# Supplementary material for: Transcriptome research of human amniocytes identifies hub genes associated with developmental dysplasia in down syndrome
Source: publisher site journal article supplement (doi:10.18632/aging.205291), 2023-12-12
Supplement: Supplementary file [file aging-v15i23-205291-supplementary-material-SD2.pdf]

## SUPPLEMENTARY TABLES

**Supplementary Table 1. Primer sequences used for RT-qPCR.**

| Gene           | Forward primer (5'–3') | Reverse primer (5'–3') |
|----------------|------------------------|------------------------|
| <b>MX1</b>     | GAGCTGGTAAAACGAGGCTG   | ATCATTCTCCAAACCTGCGC   |
| <b>MX2</b>     | AGGGAGAATGAGACCCGTTT   | TCCTTGCCTCGATACTGCTT   |
| <b>NRIP1</b>   | GCCAGAAGATGCACACTTGA   | CAAGCTCTGAGCCTCTGCTT   |
| <b>COL6A1</b>  | CTACACCGACTGCGCTATCA   | TCGGTCACCACAATCAGGTA   |
| <b>COL6A2</b>  | TGGATTCAGCTACCCAGGAC   | CTCCTTTCAAGCCAAAGTCG   |
| <b>COL18A1</b> | AGAAAGGAGCCAAGGGAGAG   | TCCTTTCAATCCGTTTCATCC  |
| <b>JAM2</b>    | TCTGTTGGATATCGCAGGTG   | TAGCATAACCAAGGCCACA    |
| <b>POFUT2</b>  | GAAAGAAGGGACCTGGGAAG   | TCCTCATAACCCAAAACCA    |
| <b>ADAMTS5</b> | CTTCACTGTGGCTCACGAAA   | TTTGGACCAGGGCTTAGATG   |
| <b>ITSN1</b>   | ATGGCTCAGTTTCCAACACC   | GATCATGCTTCGCTCTTTCC   |
| <b>SYNJ1</b>   | GGGCGTCTGTTTGTGTTGTTT  | GGCTACAGACGAAGCAAAGG   |
| <b>APP</b>     | GAGACACCTGGGGATGAGAA   | CTTGACGTTCTGCCTCTTCC   |

**Supplementary Table 2. Sequencing data filtering and mapping to the Homo sapiens (GRCh38) reference genome. “N” means normal, “T” means Trisomy.**

| Sample Name | Gender | Total raw reads (M) | Total clean reads (M) | Clean reads Q20 (%) | Clean reads Q30 (%) | Clean reads Ratio (%) | Total mapping genome ratio (%) | Uniquely mapping genome ratio (%) |
|-------------|--------|---------------------|-----------------------|---------------------|---------------------|-----------------------|--------------------------------|-----------------------------------|
| N3978       | Male   | 23.75               | 23.73                 | 97.31               | 90.94               | 99.94                 | 93.79                          | 82.07                             |
| N3994       | Male   | 23.63               | 23.62                 | 97.33               | 91.04               | 99.94                 | 93.62                          | 81.77                             |
| N992        | Male   | 21.84               | 21.82                 | 97.36               | 91.15               | 99.94                 | 93.73                          | 81.77                             |
| N1514       | Female | 23.92               | 23.76                 | 97.68               | 93.2                | 99.32                 | 95.4                           | 81.7                              |
| N1603       | Female | 23.92               | 23.76                 | 97.78               | 93.38               | 99.32                 | 95.62                          | 82.79                             |
| T521        | Male   | 23.92               | 23.7                  | 97.16               | 92.36               | 99.06                 | 94.22                          | 80.7                              |
| T418        | Male   | 23.92               | 23.83                 | 97.82               | 93.93               | 99.61                 | 95.78                          | 82.94                             |
| T2710       | Male   | 23.92               | 23.79                 | 97.7                | 93.12               | 99.43                 | 95.54                          | 83.95                             |
| T4090       | Male   | 23.92               | 23.76                 | 97.73               | 93.26               | 99.33                 | 95.58                          | 82.74                             |
| T4106       | Male   | 23.92               | 23.71                 | 97.78               | 93.42               | 99.12                 | 95.5                           | 83.85                             |
| T1787       | Female | 23.92               | 23.73                 | 98.13               | 94.38               | 99.19                 | 95.92                          | 84.22                             |
| T1797       | Female | 23.92               | 23.78                 | 97.95               | 93.88               | 99.41                 | 95.79                          | 84.3                              |
| T449        | Female | 23.92               | 23.83                 | 97.95               | 94.29               | 99.6                  | 95.85                          | 82.99                             |
| T540        | Female | 23.92               | 23.7                  | 97.25               | 92.63               | 99.07                 | 94.29                          | 80.56                             |
| T291        | Female | 23.92               | 23.79                 | 97.83               | 94.02               | 99.46                 | 95.64                          | 81.15                             |

**Supplementary Table 6. Enriched regulatory miRNAs which might regulate gene expression in Trisomy group.**

| NAME            | msigdb_c3_mir_mir_legacy_term_desc                                                                                                                             | Size (after restricting to dataset) | Original size | ES      | NES      | NOM p-val | FDR q-val | Rank at max | Leading edge                   |
|-----------------|----------------------------------------------------------------------------------------------------------------------------------------------------------------|-------------------------------------|---------------|---------|----------|-----------|-----------|-------------|--------------------------------|
| TCCAGAG_MIR518C | Genes having at least one occurrence of the motif TCCAGAG in their 3' untranslated region. The motif represents putative target (that is, seed match) of human | 127                                 | 145           | 0.52245 | 2.132416 | 0         | 0         | 2184        | tags=32%, list=17%, signal=38% |

|                                 |                                                                                                                                                                                                                                                       |     |     |          |          |          |          |      |                                      |
|---------------------------------|-------------------------------------------------------------------------------------------------------------------------------------------------------------------------------------------------------------------------------------------------------|-----|-----|----------|----------|----------|----------|------|--------------------------------------|
| CCAGGGG_<br>MIR331              | mature miRNA hsa-miR-518c* (v7.1 miRBase).<br>Genes having at least one occurrence of the motif CCAGGGG in their 3' untranslated region. The motif represents putative target (that is, seed match) of human mature miRNA hsa-miR-331 (v7.1 miRBase). | 81  | 95  | 0.508043 | 1.908009 | 0        | 0.008027 | 3059 | tags=48%,<br>list=23%,<br>signal=63% |
| GGGGCCC_<br>MIR296              | Genes having at least one occurrence of the motif GGGGCCC in their 3' untranslated region. The motif represents putative target (that is, seed match) of human mature miRNA hsa-miR-296 (v7.1 miRBase).                                               | 57  | 73  | 0.530976 | 1.862141 | 0        | 0.009899 | 2712 | tags=47%,<br>list=21%,<br>signal=60% |
| GGGACCA_<br>MIR133A_<br>MIR133B | Genes having at least one occurrence of the motif GGGACCA in their 3' untranslated region. The motif represents putative target (that is, seed match) of human mature miRNAs hsa-miR-133a and hsa-miR-133b (v7.1 miRBase).                            | 180 | 201 | 0.422789 | 1.804593 | 0        | 0.016895 | 2545 | tags=29%,<br>list=20%,<br>signal=36% |
| TTCCGTT_<br>MIR191              | Genes having at least one occurrence of the motif TTCCGTT in their 3' untranslated region. The motif represents putative target (that is, seed match) of human mature miRNA hsa-miR-191 (v7.1 miRBase).                                               | 27  | 29  | 0.585871 | 1.792728 | 0.002198 | 0.017444 | 1307 | tags=33%,<br>list=10%,<br>signal=37% |
| TTGGGAG_<br>MIR150              | Genes having at least one occurrence of the motif TTGGGAG in their 3' untranslated region. The motif represents putative target (that is, seed match) of human mature miRNA hsa-miR-150 (v7.1 miRBase).                                               | 84  | 90  | 0.46768  | 1.776212 | 0        | 0.017839 | 2071 | tags=25%,<br>list=16%,<br>signal=30% |
| TCTCTCC_<br>MIR185              | Genes having at least one occurrence of the motif TCTCTCC in their 3' untranslated region. The motif represents putative target (that is, seed match) of human mature miRNA hsa-miR-185 (v7.1 miRBase).                                               | 92  | 124 | 0.460775 | 1.755894 | 0        | 0.01902  | 2647 | tags=32%,<br>list=20%,<br>signal=39% |
| GAGCCTG_<br>MIR484              | Genes having at least one occurrence of the motif GAGCCTG in their 3' untranslated region. The motif represents putative target (that is, seed match) of human mature miRNA hsa-miR-484 (v7.1 miRBase).                                               | 87  | 104 | 0.456199 | 1.74654  | 0        | 0.021267 | 3239 | tags=38%,<br>list=25%,<br>signal=50% |
| GAGCTGG_<br>MIR337              | Genes having at least one occurrence of the motif GAGCTGG in their 3' untranslated region. The motif represents putative target (that is, seed match) of human                                                                                        | 141 | 160 | 0.42081  | 1.720128 | 0        | 0.024449 | 3035 | tags=38%,<br>list=23%,<br>signal=48% |

|                   |                                                                                                                                                                                                                                                        |     |     |          |          |          |          |      |                                      |
|-------------------|--------------------------------------------------------------------------------------------------------------------------------------------------------------------------------------------------------------------------------------------------------|-----|-----|----------|----------|----------|----------|------|--------------------------------------|
| CCCACAT_ MIR2993P | mature miRNA hsa-miR-337 (v7.1 miRBase).<br>Genes having at least one occurrence of the motif CCCACAT in their 3' untranslated region. The motif represents putative target (that is, seed match) of human mature miRNA hsa-miR-299-3p (v7.1 miRBase). | 48  | 53  | 0.499246 | 1.707622 | 0        | 0.025486 | 3657 | tags=50%,<br>list=28%,<br>signal=69% |
| GACAGGG_ MIR339   | Genes having at least one occurrence of the motif GACAGGG in their 3' untranslated region. The motif represents putative target (that is, seed match) of human mature miRNA hsa-miR-339 (v7.1 miRBase).                                                | 54  | 67  | 0.481195 | 1.678705 | 0.008734 | 0.030485 | 2980 | tags=39%,<br>list=23%,<br>signal=50% |
| TCCCCAC_ MIR491   | Genes having at least one occurrence of the motif TCCCCAC in their 3' untranslated region. The motif represents putative target (that is, seed match) of human mature miRNA hsa-miR-491 (v7.1 miRBase).                                                | 54  | 60  | 0.476821 | 1.66031  | 0        | 0.034482 | 2968 | tags=41%,<br>list=23%,<br>signal=53% |
| GTGCCAA_ MIR96    | Genes having at least one occurrence of the motif GTGCCAA in their 3' untranslated region. The motif represents putative target (that is, seed match) of human mature miRNA hsa-miR-96 (v7.1 miRBase).                                                 | 253 | 304 | 0.368728 | 1.632026 | 0        | 0.044122 | 1686 | tags=17%,<br>list=13%,<br>signal=19% |

### Supplementary Table 7. Differentially expressed genes on HSA21.

| Gene symbol | Full name                                                 | log2 (FC)    | Pvalue      | Qvalue      |
|-------------|-----------------------------------------------------------|--------------|-------------|-------------|
| GATD3B      | Glutamine amidotransferase class 1 domain containing 3B   | 2.044072127  | 2.81E-06    | 6.07E-05    |
| SIK1B       | salt inducible kinase 1B                                  | 1.18341546   | 3.66E-04    | 0.002686298 |
| ADARB1      | adenosine deaminase RNA specific B1                       | 1.205730836  | 6.49E-06    | 1.17E-04    |
| WDR4        | WD repeat domain 4                                        | -0.828616592 | 4.01E-04    | 0.00288081  |
| HSF2BP      | heat shock transcription factor 2 binding protein         | 1.554568088  | 3.87E-07    | 1.36E-05    |
| ADAMTS5     | ADAM metalloproteinase with thrombospondin type 1 motif 5 | 1.494856859  | 1.65E-07    | 7.13E-06    |
| COL6A1      | collagen type VI alpha 1 chain                            | 2.405796299  | 1.03E-15    | 1.92E-12    |
| COL6A2      | collagen type VI alpha 2 chain                            | 2.538711535  | 9.15E-11    | 1.87E-08    |
| CSTB        | cystatin B                                                | 0.848378824  | 8.78E-08    | 4.40E-06    |
| CXADR       | CXADR Ig-like cell adhesion molecule                      | 0.904156319  | 0.001373754 | 0.007497903 |
| RCAN1       | regulator of calcineurin 1                                | 0.799566386  | 0.010044804 | 0.035748108 |
| POFUT2      | protein O-fucosyltransferase 2                            | 1.202986389  | 4.64E-06    | 9.1E-04     |
| ICOSLG      | inducible T cell costimulator ligand                      | 1.555339436  | 4.80E-05    | 5.42E-04    |
| CLDN14      | claudin 14                                                | 2.178118778  | 8.40E-05    | 8.44E-04    |
| USP25       | ubiquitin specific peptidase 25                           | 0.675280692  | 1.16E-07    | 5.39E-06    |
| HLCS        | holocarboxylase synthetase                                | 0.663546966  | 0.003451792 | 0.015483813 |
| PRMT2       | protein arginine methyltransferase 2                      | 0.858043744  | 4.14E-15    | 6.18E-12    |
| IFNGR2      | interferon gamma receptor 2                               | 0.961551152  | 2.03E-13    | 1.45E-10    |

|          |                                                         |              |             |             |
|----------|---------------------------------------------------------|--------------|-------------|-------------|
| APP      | amyloid beta precursor protein                          | 1.064880765  | 3.05E-08    | 2.02E-06    |
| IL10RB   | interleukin 10 receptor subunit beta                    | 0.940053243  | 6.67E-10    | 9.31E-08    |
| LSS      | lanosterol synthase                                     | 0.76232269   | 1.71E-05    | 2.47E-04    |
| MX1      | MX dynamin like GTPase 1                                | 2.38236566   | 5.89E-05    | 6.36E-04    |
| MX2      | MX dynamin like GTPase 2                                | 3.409728684  | 3.03E-04    | 0.002315045 |
| NCAM2    | neural cell adhesion molecule 2                         | 2.571356425  | 2.12E-04    | 0.001729262 |
| NDUFV3   | NADH:ubiquinone oxidoreductase subunit V3               | 0.69376096   | 3.45E-06    | 7.20E-05    |
| PIGP     | phosphatidylinositol glycan anchor biosynthesis class P | 1.060262717  | 8.48E-05    | 8.48E-04    |
| PFKL     | phosphofructokinase, liver type                         | 1.161556614  | 1.38E-09    | 1.65E-07    |
| ATP5PF   | ATP synthase peripheral stalk subunit F6                | 0.775627977  | 2.56E-05    | 3.32E-04    |
| ATP5PO   | ATP synthase peripheral stalk subunit OSCP              | 0.607605947  | 3.67E-05    | 4.39E-04    |
| SLC37A1  | solute carrier family 37 member 1                       | 0.796543997  | 8.87E-04    | 0.005314895 |
| YBEY     | ybeY metalloendonuclease                                | 0.807321852  | 9.50E-07    | 2.72E-05    |
| CLIC6    | chloride intracellular channel 6                        | -1.188893687 | 0.013363273 | 0.044642897 |
| DNAJC28  | DnaJ heat shock protein family (Hsp40) member C28       | 1.03247852   | 0.003655606 | 0.016217814 |
| AGPAT3   | 1-acylglycerol-3-phosphate O-acyltransferase 3          | 0.755542626  | 2.36E-09    | 2.55E-07    |
| MAP3K7CL | MAP3K7 C-terminal like                                  | 2.174940448  | 1.45E-05    | 2.17E-04    |
| BACH1    | BTB domain and CNC homolog 1                            | 0.760421541  | 0.003499126 | 0.015625733 |
| JAM2     | junctional adhesion molecule 2                          | 1.062419506  | 0.002731337 | 0.012890977 |
| EVA1C    | eva-1 homolog C                                         | 1.570067836  | 3.79E-04    | 0.002763159 |
| ITSN1    | intersectin 1                                           | 0.868284327  | 4.61E-10    | 6.82E-08    |
| MRPS6    | mitochondrial ribosomal protein S6                      | 1.248989197  | 8.04E-06    | 1.40E-04    |
| TMPRSS2  | transmembrane serine protease 2                         | 4.232191202  | 4.43E-05    | 5.09E-04    |
| TTC3     | tetratricopeptide repeat domain 3                       | 0.986379526  | 4.77E-11    | 1.11E-08    |
| CFAP410  | cilia and flagella associated protein 410               | 1.461576147  | 4.23E-08    | 2.56E-06    |
| TMEM50B  | transmembrane protein 50B                               | 0.707728774  | 0.003073185 | 0.01413362  |
| COL18A1  | collagen type XVIII alpha 1 chain                       | 1.24220949   | 2.23E-06    | 5.09E-05    |
| LRRC3    | leucine rich repeat containing 3                        | 1.226185586  | 0.003436494 | 0.015433252 |
| NRIP1    | nuclear receptor interacting protein 1                  | 0.751780285  | 9.60E-04    | 0.005639749 |
| SPATC1L  | spermatogenesis and centriole associated 1 like         | 1.394378994  | 6.50E-10    | 9.16E-08    |
| PDXK     | pyridoxal kinase                                        | 0.732069197  | 8.14E-06    | 1.41E-04    |
| CBS      | cystathionine beta-synthase                             | 1.162119708  | 3.61E-05    | 4.32E-04    |
| SYNJ1    | synaptojanin 1                                          | 0.652982456  | 7.33E-05    | 7.54E-04    |
