# Supplementary material for: Transcriptome research of human amniocytes identifies hub genes associated with developmental dysplasia in down syndrome
Source: Aging (Albany NY). 2023 Dec 12;15(23):14086–108. doi: 10.18632/aging.205291 (PMC10756088; doi:10.18632/aging.205291)
Supplement: Supplementary Table 3 [file aging-15-205291-s003.xls]

## Sheet: UP
Supplementary Table 3. Selected differentially expressed genes (DEGs) from RNA-seq.
Gene Symbol	log2(Trisomy/Normal)	Pvalue(Trisomy/Normal)	Qvalue(Trisomy/Normal)
PRODH	6.1513	0.00216121	0.0106513
HAND2	5.78121	3.95008e-08	2.4297e-06
UBD	5.56869	2.09244e-07	8.4132e-06
HAPLN1	5.42973	7.04762e-07	2.20172e-05
ABCA8	5.37734	0.000384772	0.00279058
KCTD8	5.33603	0.00464445	0.0195533
SLC24A3	5.32127	7.2805e-05	0.000750826
APOD	5.16951	0.00109095	0.00622991
FAIM2	4.97225	0.00266441	0.012639
RPSAP58	4.94086	1.19339e-05	0.000185634
TSPAN8	4.94079	0.000175596	0.00147728
TRIL	4.87897	0.000160999	0.00138571
BGN	4.84901	6.04994e-14	5.31434e-11
RTP4	4.7386	0.00180688	0.00928181
CACNG7	4.70579	1.22061e-05	0.000188174
PTPRQ	4.68405	0.00206022	0.0102571
TEK	4.59152	1.93519e-08	1.40967e-06
PRRG3	4.51852	7.60305e-06	0.00013373
PALM	4.49785	5.61829e-08	3.09197e-06
TMOD1	4.48766	1.94909e-05	0.000269594
ISLR	4.46364	1.06006e-06	2.95464e-05
RIPPLY1	4.44735	0.0104494	0.036863
FOXF1	4.43799	3.02792e-07	1.15053e-05
NR0B2	4.3946	0.000428558	0.00303014
DHRS3	4.39446	3.16361e-10	4.92107e-08
FLT1	4.37598	3.25997e-07	1.20716e-05
EXTL1	4.37259	1.82392e-07	7.67229e-06
ZNF467	4.34372	2.17275e-09	2.42132e-07
IL1B	4.32598	4.01609e-06	8.08252e-05
POSTN	4.31808	7.03061e-06	0.000125637
TGIF2-RAB5IF	4.29387	0.00059118	0.00387537
H2AC7	4.2455	0.00966529	0.0346368
SULF1	4.23842	8.51958e-08	4.29807e-06
TMPRSS2	4.23219	4.42994e-05	0.000508864
ARHGEF38	4.21967	0.0109673	0.0382726
ANO1	4.16967	0.000130746	0.00117545
CFTR	4.10792	1.77343e-07	7.50215e-06
ANGPTL7	4.10423	3.95377e-08	2.4297e-06
SYNDIG1	4.08809	0.0121606	0.0415647
SFRP5	4.087	0.010137	0.0359814
TMEM35A	4.05299	1.1146e-07	5.21764e-06
PRRX1	4.02296	0.000345966	0.00256775
COL5A3	4.02218	0.00335525	0.0151572
IL33	4.00323	0.00186187	0.00947948
IQCN	3.96476	2.21514e-09	2.45027e-07
FAP	3.95055	1.73147e-13	1.36085e-10
SCNN1A	3.94573	4.40404e-05	0.000506576
CXCL12	3.92701	1.72685e-07	7.36771e-06
PAMR1	3.90192	4.46523e-06	8.80836e-05
BDKRB1	3.87786	1.06089e-05	0.00017066
CD248	3.86102	1.4458e-08	1.13037e-06
LYPD6B	3.83347	2.87085e-06	6.16839e-05
EMILIN1	3.80435	7.01838e-11	1.51892e-08
PCDH10	3.77581	4.81693e-06	9.39049e-05
BMP6	3.76498	0.000100391	0.000966566
GFPT2	3.75838	1.54582e-09	1.80342e-07
FAM43A	3.74976	1.21738e-05	0.000187996
BST2	3.74879	4.34951e-07	1.49313e-05
CYP4X1	3.73783	0.000775902	0.00479377
SGCD	3.73221	3.37586e-07	1.23072e-05
CAMK1G	3.727	0.0014603	0.0078753
OAS2	3.70613	0.000184878	0.00154666
UGT1A1	3.70592	0.0151361	0.0490511
ESM1	3.69449	1.55286e-06	3.84991e-05
MAL	3.64364	0.000154791	0.00134467
SLC22A2	3.63939	4.84934e-05	0.000545706
CCL2	3.62708	4.3082e-13	2.79714e-10
HEPH	3.60605	4.35164e-05	0.000501412
COL3A1	3.55755	6.92678e-10	9.40342e-08
UNC5B	3.54444	5.28305e-05	0.000581369
COL1A2	3.52277	6.83426e-10	9.36293e-08
TIMP3	3.51281	8.38169e-06	0.000144364
CACNA1H	3.50265	0.000134685	0.00120218
DDR2	3.49987	5.28148e-08	2.9988e-06
ZNF804A	3.49769	3.79484e-08	2.37304e-06
AGTR1	3.49602	0.000868384	0.00522255
BDKRB2	3.49488	0.000193382	0.00160898
GAL3ST3	3.48121	3.32841e-18	1.65677e-14
KCNG1	3.44003	1.85556e-07	7.78344e-06
LCN12	3.42246	6.40643e-06	0.000116242
PDGFRA	3.41941	0.00163168	0.00855242
ACSM1	3.41547	0.000162353	0.00139334
MX2	3.40973	0.000303081	0.00231504
KLRG2	3.38457	1.19723e-06	3.2506e-05
LRRC31	3.37963	0.00170241	0.00885788
IFI27	3.36464	0.000306321	0.0023374
FIBIN	3.35847	0.000496752	0.00340119
C5orf46	3.35613	0.000866419	0.00521283
PITX1	3.35196	3.38047e-05	0.000413098
IRAG1	3.34914	0.00167002	0.00871971
PGAM4	3.34799	0.00107653	0.00617027
RERG	3.33845	0.00749487	0.0284569
STRA6	3.327	4.05943e-13	2.75543e-10
DIRAS3	3.32155	9.95014e-09	8.39975e-07
ADAMTS2	3.31223	0.000537872	0.00360505
ADAMTS10	3.28686	7.02094e-07	2.20172e-05
XYLT1	3.27985	3.74838e-05	0.000446724
TSPAN32	3.24816	0.00334185	0.0151132
CHRNA1	3.22599	0.000540123	0.00361851
LRRC15	3.21865	0.00115886	0.00652288
GAP43	3.19428	2.33415e-06	5.24148e-05
NPPC	3.18863	8.63218e-06	0.000147151
H2BC8	3.18793	0.000265886	0.00206796
NTSR1	3.17232	8.90504e-05	0.00087717
AQP4	3.16815	0.00510148	0.021126
CNTN6	3.16124	0.00446794	0.0189761
PCDHB3	3.15194	0.0037078	0.0163909
EGR2	3.14462	0.00232015	0.0112893
CCN4	3.13564	0.00105657	0.00607773
ZNF385B	3.13366	0.00775661	0.0292056
HMGCLL1	3.12687	0.000897573	0.00536782
SUSD2	3.08657	3.09451e-05	0.000384126
LDHD	3.0727	0.00112407	0.00636789
NFATC4	3.07144	7.44309e-11	1.58782e-08
CCDC85A	3.05252	0.00428756	0.0183719
HSPB7	3.04714	0.00540779	0.0221447
TMEM63C	3.04137	7.06843e-05	0.000736587
RHOU	3.03008	0.000320136	0.00241933
IFITM1	3.01969	2.72936e-07	1.05316e-05
CCKAR	3.01837	3.20766e-06	6.76553e-05
GNAO1	3.01748	0.000476327	0.00329153
INHBE	3.00606	0.000209428	0.00171363
NDUFA4L2	2.98774	0.00166164	0.00868507
CLSTN2	2.98306	2.91712e-09	3.0251e-07
LMOD1	2.97679	0.000382153	0.00277614
THY1	2.97161	7.34616e-15	9.14168e-12
CCDC184	2.96369	0.000648005	0.00417457
APLP1	2.95616	3.75799e-06	7.70971e-05
NOTCH3	2.93516	2.21442e-07	8.84168e-06
SYNPO	2.93165	1.02794e-09	1.33481e-07
MFAP5	2.92706	0.00282635	0.0132445
SUCNR1	2.90093	0.00227045	0.01108
RFX8	2.8995	0.00127479	0.00707149
TBC1D3	2.88685	0.0141416	0.0465046
DKK2	2.87525	2.74362e-05	0.000351075
PRRT1	2.87444	8.93006e-08	4.4308e-06
WNT10A	2.86821	0.00131617	0.0072445
SLC2A12	2.85642	3.17714e-16	6.77774e-13
DACT3	2.85219	0.000320977	0.00242446
CHST1	2.85162	8.75889e-05	0.000867351
FBLN2	2.85041	6.19652e-08	3.31658e-06
TSLP	2.84683	0.00102315	0.00594502
KY	2.83986	0.00591373	0.0237519
ALDH1A1	2.8344	0.00100801	0.00587531
GLI1	2.82531	3.52716e-09	3.58307e-07
FAXDC2	2.82387	1.079e-06	2.98383e-05
LRRC32	2.82053	3.12432e-07	1.17138e-05
SAMD9L	2.8164	2.41412e-05	0.000317341
PRSS35	2.81519	4.67053e-06	9.15289e-05
IGF2	2.81328	0.000113674	0.00106027
BAAT	2.81137	3.41157e-05	0.000415036
PTGIS	2.80922	4.31691e-05	0.000499337
NDP	2.805	0.0042608	0.0183045
SAMD11	2.80111	0.000314023	0.00238583
FABP4	2.77803	0.00544839	0.0222968
CYP2E1	2.76638	0.0038151	0.0167762
RARB	2.75088	3.12985e-07	1.17138e-05
CLIC5	2.74773	0.000149828	0.00130914
HLA-DMB	2.73957	0.00111678	0.00633859
FLJ44635	2.73898	0.00242999	0.0117206
TWIST1	2.73724	0.000265299	0.00206447
EFS	2.73568	0.000132585	0.00118557
PNCK	2.72922	0.00154318	0.00817754
ABI3BP	2.72521	4.51084e-08	2.67303e-06
CEND1	2.72442	2.56661e-05	0.000332413
ASIC3	2.72013	0.000117308	0.00108401
PLPPR3	2.70719	0.000479008	0.0033026
VAT1L	2.70004	6.18596e-05	0.000661238
PCOLCE	2.69753	4.55922e-07	1.55086e-05
PLEKHG7	2.69458	0.00277007	0.0130408
C1S	2.69099	3.7987e-05	0.00045164
ELFN1	2.69029	0.000149045	0.00130386
CCL26	2.68959	0.00574316	0.0231854
LGR5	2.68657	0.000982746	0.00574827
H2AC6	2.67892	2.05413e-09	2.35956e-07
ICAM5	2.67751	0.000102835	0.000984382
PDGFRB	2.66897	1.41385e-12	7.40663e-10
TMEM229B	2.6645	2.60317e-05	0.000336565
H2BC4	2.65559	0.000259339	0.0020276
TBX2	2.65455	0.000177088	0.00148732
ADAMTS14	2.65297	1.11409e-07	5.21764e-06
DSC3	2.65122	1.60728e-05	0.000235989
COL1A1	2.64856	3.20102e-12	1.54196e-09
SMTNL2	2.64287	0.000805781	0.00493549
COL5A1	2.64058	0.000130677	0.00117545
AQP5	2.63772	0.00801098	0.0299294
CFB	2.63079	4.76224e-07	1.6053e-05
IL1A	2.62974	0.000751051	0.00466727
FOXS1	2.62059	0.000220493	0.00178559
SYT3	2.61886	0.00488001	0.0203955
RHOJ	2.61774	2.69408e-06	5.9076e-05
SLAMF7	2.61334	0.00370334	0.0163809
ADGRA2	2.60136	1.03772e-05	0.000168255
DOC2A	2.60097	0.000676568	0.0043134
SLC6A9	2.59641	2.38221e-10	3.90917e-08
SARDH	2.58811	1.11297e-05	0.000177051
IFI6	2.58738	5.12996e-06	9.79612e-05
TWIST2	2.58472	0.000127087	0.00115069
SSC4D	2.57853	0.00134334	0.00735878
NCAM2	2.57136	0.000211801	0.00172926
SCG2	2.56433	0.00179685	0.00924935
FBXO2	2.56402	3.06121e-10	4.8119e-08
TMEM37	2.56329	6.13042e-05	0.000658128
MFNG	2.55311	0.00154787	0.00819074
COL6A2	2.53871	9.14642e-11	1.86697e-08
GDF6	2.53773	0.00176124	0.00911392
AJM1	2.53672	9.41997e-06	0.000157189
COL26A1	2.53532	0.00644324	0.0252936
LIMS2	2.53362	4.85447e-05	0.000545872
BMP4	2.53199	2.11038e-06	4.87126e-05
SOX6	2.53139	8.43255e-08	4.2831e-06
KCNK2	2.52501	0.000675614	0.00431297
KLK10	2.51502	0.00323866	0.0147403
PANX2	2.515	7.09865e-05	0.000738705
MOV10L1	2.5117	0.00837336	0.030926
FRY	2.50944	2.19092e-06	5.03339e-05
CLIP3	2.50706	9.68804e-14	8.0373e-11
NPY4R	2.50406	3.51026e-05	0.000422732
CX3CL1	2.49482	5.3778e-08	3.01905e-06
CCDC160	2.4891	0.00281525	0.0132035
SAA1	2.48858	0.00154991	0.00819863
EDN2	2.48543	5.45474e-06	0.000103239
HSPB6	2.48396	4.98746e-08	2.87559e-06
CLIC3	2.47929	7.37521e-07	2.25684e-05
PRR15	2.46833	0.000124952	0.00113498
CCNA1	2.46565	0.000832742	0.00505709
CD34	2.46268	0.000389537	0.00281613
RGS5	2.4524	2.65413e-06	5.85437e-05
NYNRIN	2.44328	3.1788e-07	1.18483e-05
RAB17	2.44123	7.12372e-05	0.000739253
CALHM5	2.44042	2.09763e-05	0.000284504
HAS2	2.44041	0.000169121	0.00143739
IGSF10	2.43875	4.08211e-05	0.000478104
PSG3	2.43512	0.00470593	0.0197787
SLC22A17	2.43465	3.66564e-07	1.30954e-05
EPHB6	2.43161	0.00137927	0.00751494
LRP1	2.42598	4.0895e-09	3.99093e-07
TBC1D3H	2.42479	0.00595403	0.0238817
NXPH4	2.42154	0.000120902	0.00110899
LTB	2.41755	6.03513e-08	3.25352e-06
UGT1A6	2.41407	1.96224e-06	4.60003e-05
UTS2	2.40822	0.0109773	0.0382733
VSIR	2.40666	1.08733e-05	0.000174217
IFI44L	2.40656	0.000495371	0.00339329
COL6A1	2.4058	1.02978e-15	1.92221e-12
NEURL3	2.40477	0.000128607	0.00116112
ENPP5	2.39152	0.00273926	0.0129202
ANKRD24	2.39065	5.65117e-06	0.00010575
PIANP	2.38749	2.355e-05	0.000311489
PKNOX2	2.38438	0.00271489	0.0128255
HEPHL1	2.38294	0.0005868	0.00385004
LAG3	2.38264	0.0118536	0.0407856
MX1	2.38237	5.89139e-05	0.000635853
KCNH3	2.38146	0.00493108	0.0205802
CXXC4	2.38032	0.000219586	0.00178044
PLPPR4	2.37722	0.00342395	0.0153959
DACT2	2.3767	0.00702923	0.0271094
CRYAB	2.36994	0.00168722	0.00879108
PAPPA	2.36482	7.5553e-06	0.000133046
PLXNA4	2.35373	0.0105643	0.0371891
SCUBE3	2.35311	0.00011394	0.00106209
PTGS2	2.35093	0.000689046	0.00437666
H2BC5	2.34426	2.33154e-08	1.6346e-06
COL6A3	2.33874	8.85283e-06	0.000149886
SSC5D	2.3316	1.46268e-06	3.70206e-05
SOWAHD	2.32827	0.0102802	0.036421
CA11	2.32814	0.000116408	0.00107769
H3C4	2.32401	0.00313149	0.0143355
KCNK15	2.3203	0.00306753	0.0141163
ADGRB2	2.31139	4.45594e-10	6.72127e-08
GGT5	2.30605	6.90157e-05	0.000722223
LGALS9	2.30575	0.00153811	0.00816225
PLXDC2	2.29719	8.23553e-10	1.09805e-07
PCDH19	2.29711	0.0122075	0.0416958
PBX1	2.29677	2.72885e-11	8.6702e-09
MN1	2.29209	0.000193545	0.00160898
ADAM23	2.29173	0.00578437	0.0233139
B4GALNT1	2.28845	0.00120702	0.00676085
TSPAN10	2.28837	8.17565e-11	1.71954e-08
SLC12A5	2.28268	0.00464164	0.0195533
CACNG8	2.28244	0.000104314	0.000997258
AQP1	2.27966	4.68097e-06	9.16132e-05
MXRA5	2.27817	0.000123654	0.00112799
SLC4A11	2.27555	4.02247e-08	2.454e-06
OLFML3	2.27216	9.44913e-11	1.87799e-08
MMP17	2.26874	1.95608e-05	0.000270215
PLSCR4	2.26412	4.05558e-05	0.000475758
CHD5	2.25945	0.00456781	0.0193086
P2RX6	2.2577	0.000525347	0.00353724
MATN2	2.253	1.24483e-12	6.88484e-10
PLCH2	2.24955	0.00409567	0.0177432
PCSK1N	2.24744	0.0105089	0.0370117
H1-2	2.23535	0.00023356	0.00187189
PCDHGA3	2.23328	0.00110038	0.00626697
GPRC5B	2.23117	5.34203e-08	3.01028e-06
KCNJ8	2.2183	0.000902242	0.00539143
PPFIA4	2.21327	0.000167772	0.00142915
RNF150	2.20853	5.2823e-05	0.000581369
OGDHL	2.20827	0.000418763	0.00298064
LIMCH1	2.20443	2.10388e-06	4.87088e-05
IFITM10	2.20026	1.39486e-05	0.000209974
PLEKHG4B	2.19871	3.69338e-06	7.62839e-05
ACTBL2	2.19766	0.000534726	0.00358879
SLC12A3	2.19581	0.0140799	0.0463628
POU5F1B	2.19303	0.011024	0.038418
H4C8	2.19302	0.00141233	0.00765389
IL21R	2.19135	5.09121e-05	0.000564418
KCTD4	2.1882	0.000272492	0.00211054
CLDN14	2.17812	8.39602e-05	0.000843726
ERBB4	2.17601	0.00559006	0.0226838
MAP3K7CL	2.17494	1.44956e-05	0.00021668
NPAS1	2.17178	0.000206343	0.00169583
ASAP3	2.17016	3.52341e-11	9.33836e-09
RND1	2.16927	0.000246002	0.00195194
H2BC21	2.16617	0.000101159	0.000972075
SERPIND1	2.16578	0.0130761	0.0439095
MCHR1	2.16444	0.0106159	0.0373182
CFAP221	2.16431	0.00210146	0.0104325
ADAMTS15	2.1615	8.59445e-05	0.00085444
LRRC17	2.15425	1.5305e-09	1.7996e-07
PCDHB14	2.15286	0.00050054	0.00341929
NFATC1	2.15144	8.73855e-10	1.1548e-07
SESN3	2.15066	1.03064e-06	2.8946e-05
PCDHGA12	2.14851	5.93764e-09	5.36854e-07
NID2	2.14405	5.01657e-05	0.000559466
FLI1	2.13859	0.000310912	0.00236718
THBS2	2.1298	0.000100536	0.000967339
GRIK2	2.12703	0.000153626	0.00133611
KRT17	2.12534	0.00847298	0.0312104
SCN2A	2.12329	6.17549e-05	0.000660591
ALKAL2	2.12062	1.49084e-05	0.00022174
CDKN2B	2.12053	1.59724e-20	1.19258e-16
NYAP1	2.11843	2.40234e-05	0.00031635
PIK3IP1	2.11571	7.17981e-12	2.90927e-09
ZBTB46	2.11571	1.24365e-08	9.87846e-07
OAS1	2.1135	0.00104096	0.00600916
PPL	2.11321	0.000108036	0.00102038
MDGA1	2.1113	0.000255162	0.00200438
KCTD16	2.10945	0.00057272	0.00378593
ANK3	2.10638	2.88739e-10	4.58696e-08
EPN3	2.10001	0.00629237	0.0248589
SHC2	2.0987	0.0103415	0.0365687
MMP2	2.09828	7.81675e-07	2.3677e-05
PRRT2	2.09411	2.1259e-05	0.000286517
NPC1L1	2.0898	0.00557152	0.0226578
ADGRL3	2.08403	1.19967e-05	0.00018603
COL16A1	2.08234	8.43628e-06	0.00014497
LIPH	2.08149	0.000994016	0.00580283
PXDNL	2.08047	0.00107626	0.00617027
CSDC2	2.07794	5.61403e-08	3.09197e-06
CCL20	2.07719	0.00396056	0.0172983
GALNT5	2.07646	0.000937395	0.00553723
CYP1B1	2.06793	0.000439481	0.00309095
COL8A2	2.06684	1.15994e-05	0.000181756
MAB21L2	2.06508	0.000264271	0.00205969
COL21A1	2.06425	0.0142043	0.0466181
FAM180A	2.06368	0.00105434	0.00606723
SLC45A1	2.06069	3.89248e-05	0.000460225
CPT1B	2.05543	5.44488e-05	0.000596102
CYTL1	2.05379	1.58009e-06	3.89365e-05
CDK18	2.05337	9.90206e-06	0.000162492
STON1	2.05119	1.2311e-08	9.87846e-07
CAPN6	2.04801	0.00660563	0.0257955
GATD3B	2.04407	2.8077e-06	6.06764e-05
MGARP	2.04368	0.001482	0.00795819
KCNAB2	2.03947	4.09126e-07	1.41751e-05
PADI2	2.03786	0.000201428	0.00166092
TMEM86A	2.03543	0.000431816	0.00305029
PRRX2	2.03198	0.00100655	0.00586911
VASN	2.03109	5.46241e-09	5.06647e-07
CD200	2.02986	1.71894e-05	0.000247006
ADCY5	2.02605	0.0147523	0.0480051
NTNG2	2.02587	9.09016e-06	0.000152864
PCDHGA4	2.02084	0.000921621	0.00547873
IFI44	2.01944	2.7632e-05	0.000353277
PCDH18	2.01888	3.3977e-05	0.000414864
GATA6	2.01133	0.000192447	0.00160279
KCNT2	2.01033	8.04613e-08	4.12896e-06
EGR3	2.00719	0.0146273	0.0476815
SUPT20HL2	2.00681	0.000774934	0.00478977
PLAAT4	2.00423	0.00857185	0.0315046
RAP1GAP	1.99985	0.000141225	0.00124861
LDB3	1.99738	0.00103184	0.00597688
DBP	1.99698	0.00282687	0.0132445
CFH	1.989	2.0835e-09	2.37503e-07
DEPTOR	1.98143	0.00169265	0.00881018
TCF7L1	1.97893	3.08645e-05	0.000383443
DNAAF3	1.97707	0.000509063	0.00345853
TNFAIP6	1.97482	0.00607865	0.0242358
LYL1	1.97117	0.000525753	0.00353811
CGREF1	1.96534	0.00863494	0.0317287
ATP6V1G2	1.96307	0.000129629	0.00116893
GIPC3	1.95775	7.28773e-05	0.000751054
ARHGEF25	1.9522	1.68942e-05	0.000244696
SLC34A2	1.94905	0.0142269	0.0466821
MAP1A	1.94704	0.000104632	0.000999661
MUC19	1.94526	0.00329366	0.0149315
TFEB	1.93811	2.42881e-06	5.43508e-05
ASB2	1.93798	0.00944167	0.0339659
MEGF6	1.9352	1.70279e-07	7.28589e-06
OPRL1	1.93492	1.30947e-05	0.00019933
MYOM1	1.93047	0.010906	0.0381137
RNF144B	1.92466	1.03284e-06	2.8946e-05
FILIP1	1.92324	0.00787344	0.0295561
CLEC11A	1.92211	0.000502495	0.00342325
ACSM3	1.91877	0.000745286	0.00465064
ULBP1	1.91875	7.39474e-05	0.000759143
PODNL1	1.91712	5.86128e-06	0.000108729
BRSK2	1.91605	0.00258545	0.0123232
CLEC18C	1.91039	0.0134343	0.0448199
PDGFRL	1.90564	0.000747078	0.00465226
NR2F1	1.90116	2.38608e-06	5.35005e-05
HMCN1	1.89911	0.000288684	0.00221983
PRRT3	1.89718	2.84628e-08	1.93198e-06
GLIS2	1.89572	2.66081e-06	5.86046e-05
LMO2	1.89498	0.00293762	0.0136234
MMP13	1.89455	0.00282742	0.0132445
DLL1	1.8944	0.00333225	0.0150835
TMEM200C	1.89385	0.011082	0.0385753
CEMIP	1.893	0.0136252	0.0453051
ZNF497	1.89247	0.00137624	0.00750327
GYG2	1.8923	0.00308673	0.0141663
SPEG	1.89143	1.35469e-06	3.51819e-05
MSX1	1.88642	0.0016439	0.00860742
SOX17	1.87959	0.00805637	0.0300543
TMEM178A	1.87786	0.00148003	0.00795581
SYTL1	1.87597	9.12448e-17	2.72512e-13
ANXA8L1	1.8756	0.00980821	0.0350397
C1R	1.87335	2.41388e-05	0.000317341
GPER1	1.87234	3.06897e-09	3.16061e-07
HSF4	1.87074	1.73395e-05	0.000248017
GPRIN2	1.87068	5.16272e-07	1.71322e-05
SERPINA6	1.86936	0.0107067	0.0375667
ADAMTS16	1.86162	8.78781e-06	0.000149123
UBE2L6	1.86126	4.1442e-07	1.43253e-05
CFI	1.86012	0.00412846	0.0178438
MYO15B	1.8582	0.00295329	0.0136834
OLFM2	1.85779	0.00109275	0.00623781
NPY1R	1.85769	0.00211089	0.0104655
SYNGR1	1.85534	3.0588e-07	1.15638e-05
MFAP2	1.85381	1.86736e-07	7.78919e-06
UBA7	1.84937	2.73147e-06	5.95354e-05
PCDH17	1.84633	0.00634093	0.0250037
GPR162	1.84287	0.000985779	0.00576326
SEPTIN4	1.83991	0.000561166	0.00373269
PTPRS	1.83768	8.08969e-05	0.000818451
ADGRL1	1.83453	3.2292e-11	9.2065e-09
GLT8D2	1.83444	2.1436e-08	1.53159e-06
LMF1	1.83328	1.28577e-07	5.77985e-06
PTCHD4	1.83316	1.11062e-08	9.07882e-07
SAMD9	1.83232	1.05377e-05	0.000170118
TNFSF10	1.83072	0.0142343	0.046696
FBLN5	1.83008	0.00303077	0.0139978
B3GNT4	1.8285	0.000254584	0.0020009
FGF18	1.82652	0.00067404	0.00430713
DUOX1	1.82527	0.00423117	0.0181877
CACNG6	1.82463	0.000603197	0.00394375
CHAC1	1.82322	5.0073e-06	9.6049e-05
PID1	1.81772	0.000733237	0.00459096
ITGA11	1.81366	0.0115968	0.0400406
ADSS1	1.8053	2.41018e-07	9.49635e-06
SRPX2	1.80152	3.89799e-08	2.4153e-06
ISM2	1.79834	0.00442196	0.0188279
EGR1	1.79825	0.000467878	0.00324968
NFIX	1.79777	5.66002e-06	0.000105784
DHX58	1.79744	9.78003e-08	4.72985e-06
AXIN2	1.79118	0.00128188	0.00710025
BCAM	1.78951	0.000212668	0.00173539
SCX	1.78929	0.001149	0.00647643
PCDHGB3	1.78652	8.72314e-05	0.000864384
PCDHB15	1.7858	0.00162868	0.0085402
IGFBP4	1.783	1.45474e-05	0.000217236
NLGN2	1.78274	1.43837e-12	7.40663e-10
ANXA10	1.78267	0.0100504	0.0357595
MEF2B	1.78203	0.00297037	0.013754
C14orf132	1.78165	0.000421932	0.00299696
MISP3	1.77787	0.000162175	0.00139261
CD4	1.77768	0.000335249	0.00250689
KIAA1755	1.77726	0.00146747	0.0078997
SATB1	1.77459	6.08284e-09	5.43922e-07
SERPING1	1.76695	0.0135743	0.045176
SEMA3D	1.76586	0.00717547	0.0274677
F10	1.7641	0.00535799	0.0219984
CDH11	1.76032	0.000918765	0.00546828
SERPINF1	1.75871	8.55775e-05	0.000852521
SEMA3B	1.75518	0.000674061	0.00430713
PLXNB3	1.75179	0.000140686	0.00124459
KCND1	1.74524	6.37136e-08	3.39799e-06
RSAD2	1.74175	0.00887218	0.0323932
CHST9	1.74029	0.00149146	0.00799714
TREX1	1.73995	0.000979311	0.00573492
CREB3L1	1.73825	0.000195908	0.00162437
PNPLA7	1.73352	0.000191304	0.00159417
ANKRD34A	1.73178	1.8515e-05	0.000260099
LTBP3	1.73123	0.000140233	0.00124205
PROC	1.73006	0.00278157	0.0130702
LDLRAD4	1.72852	0.00865392	0.0317828
IZUMO4	1.72378	0.000187126	0.00156283
EPSTI1	1.721	0.00234227	0.0113784
ACTA2	1.71983	0.000101515	0.000974874
GNG7	1.70981	0.000147059	0.00129103
PRSS16	1.70599	0.00239961	0.0115966
H2AC8	1.70563	0.0134442	0.0448404
PCDHGA10	1.70522	3.25255e-08	2.11175e-06
FGF11	1.7031	2.49521e-06	5.55305e-05
PDLIM3	1.70079	0.00153666	0.00815875
CPAMD8	1.69878	3.00856e-05	0.000376902
AK8	1.69732	0.00317228	0.0144868
BEGAIN	1.6972	0.0141311	0.0464801
STXBP6	1.69336	0.0144442	0.0472393
TMEM171	1.69192	2.546e-05	0.000330603
ZFPM2	1.69164	0.000219619	0.00178044
ANKRD2	1.68938	0.000223436	0.00180453
APOL1	1.68922	0.00125598	0.00698642
DYRK1B	1.6872	5.49784e-06	0.000103923
PRSS12	1.685	0.00103387	0.00598403
C1orf54	1.68174	2.11056e-06	4.87126e-05
TTC34	1.68171	0.00048349	0.0033287
SLC2A10	1.68071	4.30798e-05	0.00049869
ADAMTS13	1.6792	7.04034e-07	2.20172e-05
CDC42EP5	1.67637	0.0024368	0.0117421
ZPLD1	1.67569	0.0151856	0.0491582
ITGB4	1.67336	0.000433871	0.00305976
HCST	1.66994	0.00750618	0.0284781
SLC27A1	1.66838	4.74401e-12	2.14674e-09
ANGPT1	1.66678	0.00647515	0.0253988
CTHRC1	1.66416	9.21211e-05	0.00090122
SEPTIN5	1.66334	0.00142615	0.00770543
RAB7B	1.66305	0.000777547	0.00479858
NRSN1	1.6629	0.00431889	0.0184796
ATP6V1FNB	1.66153	0.00438508	0.0186986
LOX	1.65892	0.00414276	0.0178849
DPEP1	1.65611	0.00434735	0.0185695
CARNS1	1.65501	8.66556e-06	0.000147552
PDK2	1.65355	1.51893e-06	3.79301e-05
REEP2	1.65306	0.000125585	0.00113948
PLEKHB1	1.65076	8.92539e-05	0.000878595
TCP11L2	1.65067	0.000160956	0.00138571
NPTXR	1.64906	7.14615e-05	0.000740551
EIF5AL1	1.64896	0.0108084	0.037843
TRIM22	1.64759	3.93754e-12	1.83748e-09
MFGE8	1.64639	1.65737e-05	0.000241223
CFAP206	1.64571	0.00284305	0.0133005
ELF3	1.64309	0.00465967	0.0196063
TSHZ3	1.64149	4.8716e-05	0.000546974
H2BC12	1.63836	0.0001256	0.00113948
PCDHGA6	1.63605	0.000206853	0.00169908
ADGRB1	1.63193	0.00498517	0.0207653
EDARADD	1.63172	0.000171805	0.00145357
SOBP	1.63036	0.00750131	0.0284741
ST3GAL5	1.62596	8.24882e-07	2.46393e-05
ITGBL1	1.62434	0.00347114	0.0155426
PLAT	1.6241	8.51786e-05	0.000850599
ZFHX2	1.62259	2.90327e-08	1.95291e-06
GLI2	1.62233	0.000455044	0.00317977
RASAL1	1.62129	0.0108018	0.037829
CYP39A1	1.62067	0.0112562	0.0391087
RCAN2	1.62009	0.00191991	0.00971204
RAB43	1.61961	8.87047e-05	0.000874919
SCN8A	1.61453	0.000863414	0.00519684
EFNB3	1.61307	0.000579842	0.00382286
STAT4	1.60939	0.000585139	0.0038458
B3GNT7	1.60761	0.000305992	0.00233608
AQP3	1.60739	0.00181027	0.00929278
EXD3	1.60723	5.26155e-05	0.000580213
CCDC110	1.60366	0.000977826	0.00572847
RARG	1.60214	4.80216e-11	1.11472e-08
RHBDL1	1.60041	0.000351637	0.00259693
PRKCG	1.59752	1.1434e-05	0.000179731
TNFRSF9	1.59234	3.42848e-05	0.000415953
MRGPRF	1.59077	0.000501927	0.00342289
IFIT1	1.58983	0.00286289	0.0133557
SYTL5	1.58695	0.0140227	0.0462255
CTF1	1.58332	5.58388e-09	5.14717e-07
TMEM240	1.58214	0.000114279	0.00106392
FBXO32	1.57945	9.6578e-05	0.000934066
SHH	1.57835	0.00656765	0.025674
STX1B	1.57699	4.53365e-06	8.91976e-05
HSPG2	1.57696	3.03301e-06	6.43581e-05
DRP2	1.57688	0.0115179	0.0397956
ODAPH	1.57379	0.00213396	0.0105584
GBP2	1.57112	3.34592e-05	0.000410219
GXYLT2	1.57109	6.81243e-07	2.15074e-05
EVA1C	1.57007	0.000379326	0.00276316
ST8SIA4	1.56976	2.87596e-06	6.1705e-05
SBK1	1.56861	0.00599808	0.0239875
TNNC1	1.56778	0.000761644	0.00472523
ABCG4	1.56496	0.00404138	0.0175538
CSRNP3	1.56428	1.5141e-06	3.78727e-05
ITGAM	1.56333	0.0147478	0.048001
OSCAR	1.56181	0.000608542	0.00396654
EVI5L	1.56069	1.17272e-05	0.000182801
ALDH1L2	1.55862	3.59473e-05	0.000431512
SAMD14	1.55577	2.38243e-09	2.55949e-07
ICOSLG	1.55534	4.80114e-05	0.000542326
HSF2BP	1.55457	3.8656e-07	1.35694e-05
CFHR3	1.55449	0.000462884	0.003224
COL14A1	1.55436	0.000225613	0.00181817
TTYH2	1.55189	0.00262941	0.0125008
GNG2	1.55016	3.70985e-06	7.64126e-05
H3C6	1.54955	0.0128372	0.0433216
KIF5A	1.54808	0.000890303	0.00533075
MTRNR2L10	1.5467	0.00701011	0.0270566
B4GALNT4	1.54652	0.0073539	0.0280285
NOXA1	1.54613	0.00595904	0.0238954
KNDC1	1.54439	0.010762	0.0377253
CHRD	1.54033	0.000986117	0.00576326
CYBRD1	1.5396	0.00396579	0.0173076
LRRC43	1.53331	8.5999e-05	0.00085444
PCDHGA7	1.53255	5.42864e-05	0.000594761
MYL9	1.52973	0.000251458	0.00198272
NUTM2B	1.5269	0.0135974	0.0452328
MEIS1	1.52446	0.00826576	0.0306422
SPON2	1.52401	0.00541482	0.0221654
TRIB2	1.5227	0.00161393	0.00848024
MAP6	1.52166	0.00414714	0.0178935
SRGAP3	1.52105	0.001293	0.00714066
SOCS1	1.52101	0.0037001	0.0163714
COL4A3	1.51916	0.0134144	0.0447738
MAPRE3	1.51645	2.82739e-05	0.000360251
ARMC12	1.51608	0.0061363	0.024416
RAB26	1.51596	0.00023777	0.00189873
ABCA4	1.51423	0.00522673	0.021555
MRC2	1.51371	1.61149e-05	0.000236156
MMP23B	1.51345	0.0140176	0.0462201
BCL3	1.51276	7.48174e-05	0.000767341
PPP1R32	1.51141	0.0140006	0.0461951
RASSF4	1.50913	4.43471e-06	8.77134e-05
LGSN	1.50424	8.56393e-07	2.53238e-05
DAAM2	1.50308	0.000585989	0.00384641
UST	1.50257	3.45077e-07	1.25074e-05
SELENOM	1.50199	0.0012793	0.00709121
COL4A6	1.5017	0.0141212	0.0464681
CRISPLD2	1.50137	0.000819562	0.00499531
ABHD4	1.49961	2.62725e-09	2.80234e-07
PCDHB13	1.49787	0.00448402	0.0190248
TMEM59L	1.49488	0.00641916	0.0252389
ADAMTS5	1.49486	1.64913e-07	7.13024e-06
PBXIP1	1.49361	3.11656e-07	1.17138e-05
PRDM8	1.49341	0.000547416	0.00365753
ADHFE1	1.49092	0.000727017	0.00455583
SEMA4G	1.49072	1.34013e-07	5.99164e-06
GLP2R	1.49048	5.67112e-05	0.000616353
PRICKLE4	1.48963	1.11259e-08	9.07882e-07
SHF	1.4889	0.00149397	0.00800485
PPFIBP2	1.48532	0.0048999	0.0204672
KCNC3	1.48335	0.0153514	0.0495445
PRR36	1.47953	0.000585532	0.0038458
CALHM2	1.47846	0.00365255	0.0162091
CORO6	1.47729	7.1358e-05	0.000739993
FAM131B	1.47643	0.00068002	0.00432853
ATOH8	1.47532	0.0146013	0.0476282
PPM1N	1.47369	0.00946503	0.0340335
PLA2G6	1.47033	2.24225e-05	0.000299495
SORBS2	1.47031	0.00222862	0.0109114
SLC25A42	1.47022	9.01709e-07	2.6248e-05
CNIH2	1.46842	0.00558933	0.0226838
MAP1LC3C	1.46744	0.00609751	0.0243005
KMO	1.46729	0.0133293	0.0445594
PLOD2	1.46717	0.000110698	0.00103964
SYNE3	1.46687	0.000442617	0.00310602
LOXL1	1.46338	0.000657429	0.00422435
LRRN3	1.46247	0.00971932	0.0347887
PCDHGA5	1.46223	0.00194804	0.0098178
TXK	1.46205	1.85481e-05	0.000260318
CFAP410	1.46158	4.23475e-08	2.56022e-06
CD177	1.46074	0.00896618	0.0326248
PLEKHH2	1.46023	0.000231836	0.00186229
IDUA	1.46019	0.000932266	0.00551785
PCSK4	1.45896	0.00152784	0.00812796
ADAMTS12	1.45758	0.00217882	0.0107339
DEPP1	1.45658	4.61454e-05	0.00052482
ADM2	1.45582	0.00136454	0.00745579
DCN	1.45351	0.00154507	0.00818468
JUP	1.44879	2.87312e-05	0.000363596
GPR153	1.44819	0.000150313	0.00131035
CRTC1	1.44704	1.3501e-06	3.5129e-05
INPP5D	1.44504	0.0102253	0.0362608
ACSF2	1.445	1.99543e-07	8.18621e-06
SLC6A16	1.44288	0.000247784	0.00196399
NMNAT3	1.44257	0.00416667	0.017957
SARM1	1.43846	0.00192141	0.00971473
ZNF219	1.43464	0.000167865	0.00142915
PRAF2	1.43288	6.73803e-07	2.14083e-05
PLLP	1.43073	0.0104461	0.03686
CASTOR1	1.43052	0.000251474	0.00198272
SHISA4	1.42838	3.87925e-05	0.000459388
PDZK1IP1	1.42752	0.0136433	0.0453553
SLC44A2	1.42692	3.74767e-06	7.70853e-05
PDZD7	1.42683	3.91396e-07	1.36879e-05
TNFAIP2	1.42663	0.000784445	0.00483277
MMP19	1.42583	0.000432467	0.00305344
WBP1	1.42419	1.11809e-06	3.07484e-05
CNGA1	1.4218	0.00671534	0.0261214
EBI3	1.42173	0.000652213	0.00419625
C19orf18	1.41779	0.0139769	0.0461559
KCNIP3	1.41738	0.00998609	0.0355985
RGL1	1.4143	2.03822e-05	0.000279493
ABCA2	1.41189	1.63555e-06	3.99081e-05
TP53INP2	1.41041	2.70194e-07	1.04719e-05
PAPLN	1.40824	0.00256786	0.012255
SLC29A4	1.40466	5.10686e-05	0.000565313
GASK1B	1.40237	6.56052e-06	0.000118462
CARD9	1.39842	0.00238137	0.0115286
ABAT	1.39791	0.000944705	0.005565
ARHGAP24	1.39585	9.62497e-06	0.000159169
CUBN	1.39555	1.57441e-07	6.91488e-06
SPATC1L	1.39438	6.49913e-10	9.1558e-08
SBK2	1.3916	4.09898e-05	0.000479328
THRA	1.39104	2.2401e-08	1.58537e-06
LAYN	1.39103	0.0015157	0.00808357
YPEL3	1.38966	0.000311406	0.00236894
SCNN1D	1.38766	0.00104049	0.00600916
GUCA1C	1.38667	0.00188441	0.0095714
VWF	1.38666	0.0138557	0.0458166
ANXA8	1.38591	0.00764755	0.028875
LPCAT2	1.38581	0.00193893	0.00978179
SLIT3	1.38476	0.000964197	0.00566155
KIF12	1.38161	0.00138555	0.00753833
MBOAT7	1.38123	1.6673e-05	0.000242085
ANK1	1.37893	0.00189879	0.00962633
FOXP3	1.377	0.0106797	0.0374893
FSCN2	1.37654	9.58375e-05	0.000928709
FAM117A	1.3755	8.85149e-09	7.64042e-07
SECTM1	1.37493	0.0111899	0.0389054
VPS37D	1.37345	0.000816938	0.00498135
TRPM4	1.37339	0.000141544	0.0012507
C15orf65	1.37183	2.66673e-05	0.000342705
SLC25A27	1.37067	0.00590945	0.0237457
LOXL4	1.36967	1.1057e-08	9.07882e-07
MAPK3	1.36862	5.96206e-08	3.22578e-06
KCNN3	1.36812	4.43353e-05	0.000508885
GAL3ST1	1.36648	0.0152344	0.0492653
CXCL6	1.3663	0.00629402	0.0248589
TINAGL1	1.36515	0.000108844	0.00102544
SMIM1	1.36162	0.0141979	0.0466181
ISG15	1.36071	0.002799	0.0131438
VASH1	1.36022	2.32087e-12	1.15525e-09
TCEA3	1.35982	0.00160242	0.00842864
SH2B2	1.3594	0.011671	0.0402667
CERCAM	1.35935	0.000173367	0.00146347
DDR1	1.35756	2.23234e-10	3.74556e-08
SPOCD1	1.35724	0.00201294	0.0100667
KLHL24	1.35719	0.00177064	0.00914912
PLD3	1.35628	1.05777e-05	0.000170395
GSTM2	1.35304	1.79286e-06	4.25641e-05
GAA	1.35165	0.000106281	0.00100829
OLFML2A	1.35162	0.000403509	0.00288997
SHANK1	1.35133	0.0144996	0.047348
PSCA	1.35113	0.00798212	0.0298515
C17orf97	1.35086	0.00532291	0.0218731
BACH2	1.35032	0.00311989	0.0142912
ARRDC4	1.34962	0.0050848	0.0210833
SLC16A4	1.34509	1.10563e-05	0.000176392
KALRN	1.34503	3.69173e-06	7.62839e-05
SGPP2	1.34258	0.00774691	0.0291838
ATP2A3	1.34234	0.0003189	0.00241243
RASSF9	1.34166	6.44977e-05	0.000683565
TMCC2	1.34096	7.25681e-08	3.80231e-06
ADGRG1	1.34094	0.00381517	0.0167762
TCEA2	1.33988	9.56714e-08	4.65362e-06
GPR68	1.33863	2.98102e-05	0.000374081
FRAT1	1.33824	0.00339829	0.015312
CRABP2	1.3379	0.00537035	0.0220317
CAMK1D	1.3366	6.38399e-07	2.04575e-05
CALCOCO1	1.33619	4.04262e-08	2.454e-06
STARD5	1.33376	0.000382928	0.00277856
KRT23	1.33214	0.00570715	0.0230587
TPBG	1.33188	1.87161e-10	3.21251e-08
LZTS3	1.33006	5.36309e-05	0.000588875
HSD17B14	1.32834	0.00475589	0.0199438
CDH18	1.32736	0.0112721	0.0391325
LMNTD2	1.32599	0.00019836	0.00164015
RAB3A	1.32551	0.00827271	0.0306466
SPARC	1.32532	1.16786e-05	0.000182423
SYT15	1.32525	2.6349e-05	0.000340077
CTXN1	1.3249	0.00936946	0.0337794
CHPF	1.32487	0.00220144	0.0108138
GLI4	1.32304	0.00164372	0.00860742
TBC1D17	1.32256	3.58613e-09	3.61835e-07
RALGPS1	1.32219	0.000410187	0.00292518
HCFC1R1	1.32124	0.00024334	0.00193493
VPS9D1	1.32105	6.74369e-10	9.3244e-08
ADAMTS7	1.32058	5.52459e-06	0.000104188
TNFSF4	1.32031	0.000554858	0.00369897
CCDC146	1.32031	0.00355166	0.0158272
FOXO4	1.31925	9.09122e-08	4.49534e-06
KCNMB4	1.31835	9.98813e-06	0.000163366
IGSF23	1.31562	0.00837506	0.030926
KAZALD1	1.3153	1.3776e-06	3.55913e-05
ST6GAL2	1.31392	0.0100438	0.0357481
ABCA7	1.31055	1.2223e-07	5.57745e-06
TSC22D3	1.30947	1.90448e-05	0.000264801
SELENBP1	1.30853	0.0011173	0.00633918
HOXB8	1.30822	4.3483e-05	0.000501412
S1PR1	1.30735	0.00580207	0.02336
PAQR6	1.30659	0.00290624	0.0135157
RAPGEF3	1.30623	0.013804	0.0456861
SOX4	1.30623	4.22887e-06	8.45377e-05
SYT1	1.30535	0.000943301	0.00555892
CDKN2A	1.3043	0.000255597	0.00200569
CD74	1.30203	0.00348957	0.0155924
RNF152	1.30041	0.0109526	0.0382317
THBS3	1.29771	2.97283e-11	9.05984e-09
MAML3	1.29656	1.59601e-06	3.90069e-05
COL24A1	1.29613	0.000708382	0.00447473
HSD11B1L	1.29455	0.000106584	0.00100927
MMP25	1.29419	0.00699204	0.0270078
B3GALT4	1.29418	0.00442359	0.0188279
NFIA	1.29072	0.00407507	0.0176689
RNASE4	1.2895	9.52188e-06	0.000158165
TM7SF2	1.28873	6.45636e-05	0.000683778
GDF5	1.28809	0.000216856	0.00176379
ZNF862	1.28519	1.07443e-10	1.99406e-08
MYPOP	1.28506	0.000316325	0.00239902
FHDC1	1.28454	0.0104864	0.036941
AEBP1	1.28434	0.00144894	0.00781967
NAALADL2	1.28431	0.000797206	0.00489698
ZNF575	1.2831	0.000377876	0.00275441
OBSL1	1.28093	3.31866e-07	1.22063e-05
ORAI3	1.27916	3.41278e-05	0.000415036
TOM1L2	1.27806	2.79885e-05	0.000356918
CSPG4	1.27636	0.0135358	0.0450681
NATD1	1.27298	0.000129208	0.00116584
RASL10B	1.27296	0.00146302	0.00788141
TRIM2	1.27283	0.00500028	0.020805
BRSK1	1.27283	0.0113181	0.0392402
ECM1	1.26946	0.000337124	0.00251713
PIK3C2B	1.26868	3.92065e-06	7.94397e-05
SNCG	1.26761	0.00151186	0.00807171
FBXL8	1.2676	0.00188079	0.00955627
ABHD14B	1.26731	1.92603e-13	1.43807e-10
LHPP	1.26451	0.00285549	0.0133378
PCDH9	1.26444	0.00396616	0.0173076
MPP2	1.26407	0.000145533	0.00127989
LRRC75B	1.26275	0.0073434	0.0279957
PLPPR2	1.26228	0.00776772	0.0292327
MIB2	1.26114	1.97912e-05	0.000272892
LDLRAD2	1.25734	0.00133476	0.00731988
PHF21A	1.2573	9.75737e-18	3.64267e-14
HID1	1.25715	5.83929e-05	0.000632787
RHBDF1	1.25612	1.37137e-05	0.000207065
NLRP10	1.25447	0.00763048	0.0288325
OCEL1	1.25436	0.00056328	0.00374126
MRPS6	1.24899	8.04159e-06	0.000139999
ALPK2	1.24892	0.011451	0.0396011
PLCD1	1.24769	3.26809e-15	5.4225e-12
PML	1.24732	9.47888e-06	0.000157802
CMTM1	1.24637	0.000140149	0.00124205
CASS4	1.24282	0.00789214	0.0296077
COL18A1	1.24221	2.23399e-06	5.0854e-05
RETREG1	1.24157	0.00659791	0.0257721
ITGA10	1.24104	0.00308608	0.0141663
HLX	1.24006	0.00652576	0.0255504
SLC9A9	1.23983	0.0126703	0.042894
C17orf100	1.23933	0.000196221	0.00162519
MSLN	1.23613	0.000947097	0.00557689
SULF2	1.23449	0.000675843	0.00431297
SHFL	1.22977	2.47471e-05	0.000323032
TNC	1.22878	0.000750697	0.00466701
BHLHE40	1.22731	5.58276e-06	0.000104865
SMPDL3B	1.22707	0.00413385	0.0178518
LRRC3	1.22619	0.00343649	0.0154333
MXI1	1.22615	2.48204e-05	0.000323627
NREP	1.2256	1.5638e-06	3.85988e-05
SEZ6L2	1.22499	0.00347936	0.0155701
LYRM9	1.22466	0.00188519	0.00957209
CEL	1.22423	0.00318409	0.0145273
SLC9A4	1.22102	0.0122393	0.0417474
SNX32	1.21897	0.0143509	0.0470167
BTN3A3	1.21819	2.62471e-08	1.80448e-06
SLC7A8	1.21816	0.0119045	0.040939
LOXL2	1.21728	4.06303e-10	6.25497e-08
FAM171A2	1.21712	0.0052153	0.0215139
TMEM139	1.21679	1.14201e-05	0.000179731
MST1	1.2157	0.000869637	0.00522797
CBLN3	1.21559	0.00260869	0.0124141
GPR173	1.21446	4.7329e-05	0.000535427
CAPS	1.21396	1.04166e-06	2.91293e-05
LXN	1.21256	5.33391e-08	3.01028e-06
KLHL4	1.21216	0.0121607	0.0415647
MED12L	1.21093	0.000193442	0.00160898
FN1	1.21007	6.81542e-08	3.58361e-06
SLC29A3	1.20861	0.00351905	0.0156912
ADARB1	1.20573	6.48892e-06	0.000117311
TPM2	1.20343	0.0141914	0.0466181
MXD4	1.20339	0.00102614	0.00595314
POFUT2	1.20299	4.63928e-06	9.1036e-05
MBD6	1.20289	3.20226e-06	6.76369e-05
ABHD8	1.20181	0.000470389	0.0032618
DAB2	1.20102	0.00385825	0.0169357
SLC46A3	1.20053	4.47135e-05	0.000512378
SLC9A3R2	1.1949	0.000814739	0.00496997
NIPSNAP3B	1.19489	0.00179871	0.00925449
SEC31B	1.19403	3.45297e-05	0.000417854
TNFSF13B	1.19397	0.00392673	0.0171757
SYNGAP1	1.19348	1.38968e-07	6.19466e-06
LINGO2	1.19308	5.96549e-07	1.94242e-05
MAST3	1.19254	1.70193e-05	0.000245317
AIF1L	1.19095	0.000350006	0.00258744
MOK	1.19005	0.00741263	0.0282105
GGN	1.18681	0.000208246	0.00170583
BBS1	1.18546	8.04387e-06	0.000139999
PTMS	1.18528	0.00345043	0.0154824
TAMALIN	1.18505	0.00554622	0.0225789
RGS9	1.18484	0.00979709	0.0350168
CDH6	1.1841	0.014127	0.0464768
SIK1B	1.18342	0.000365716	0.0026863
TGFB2	1.18131	0.00183006	0.00936863
TRPV4	1.18121	0.0121457	0.041534
SHROOM2	1.18013	0.000567369	0.00375806
WFS1	1.1792	0.000372051	0.00272165
CLSTN3	1.17848	7.28414e-07	2.24276e-05
SPATA6L	1.1771	0.000118166	0.00108723
HECW2	1.1754	0.00176351	0.00911859
TTLL1	1.17506	5.26848e-11	1.19203e-08
ZER1	1.1748	1.28371e-05	0.000195608
HOXC6	1.17377	0.000479035	0.0033026
IRF9	1.17313	2.75996e-06	5.9992e-05
EFNA3	1.17226	0.00434488	0.0185643
IFITM3	1.17189	1.69923e-05	0.000245317
NPFFR2	1.16983	0.0108134	0.037843
TIMP1	1.1685	0.000407442	0.00291256
GABARAPL1	1.16688	2.27803e-05	0.000303918
RHPN1	1.1641	0.00326739	0.0148484
HOXC8	1.16383	0.00464433	0.0195533
A1BG	1.1637	8.1481e-05	0.000822688
GSTM4	1.1623	0.00554173	0.0225742
CBS	1.16212	3.60822e-05	0.000432437
SEMA6B	1.16194	0.00875988	0.0320852
PFKL	1.16156	1.38473e-09	1.65425e-07
FAM214A	1.15972	3.02254e-05	0.000377969
MAP2K6	1.15641	0.00598472	0.0239469
CASR	1.15472	0.0146191	0.0476757
TBKBP1	1.15301	0.00158636	0.00835594
PLEKHG1	1.15197	0.0024362	0.0117421
DNAJB4	1.15004	9.22162e-05	0.00090122
IGFBP7	1.14892	0.000519521	0.00350882
DTX4	1.14832	0.0132107	0.0442713
CPLX1	1.14769	0.00385715	0.0169357
FBXO44	1.14563	1.98063e-06	4.62859e-05
COPZ2	1.14174	0.00982548	0.035093
ANKRD53	1.14109	0.00080636	0.00493701
TMEM150A	1.13937	9.56033e-06	0.000158627
COL4A5	1.13926	0.00241224	0.0116538
PPFIA3	1.13902	0.00830771	0.0307457
PRKN	1.138	0.00194715	0.0098178
GDF15	1.13621	0.00201674	0.010079
MAP3K12	1.13568	3.55138e-07	1.28098e-05
PDGFD	1.13304	0.000365298	0.00268454
KSR1	1.13068	8.48253e-06	0.000145435
TMEM25	1.13013	7.5175e-05	0.000770479
ARHGAP28	1.12982	0.00303146	0.0139978
COL11A2	1.12933	0.00158072	0.00832919
IRF7	1.12888	0.00424056	0.0182228
SPATA20	1.12822	4.65911e-11	1.11472e-08
EFEMP2	1.12812	0.000138833	0.00123331
ADPRHL1	1.1274	0.00692412	0.0268214
SLC44A3	1.12652	0.00284806	0.0133198
NACAD	1.12613	9.45762e-06	0.000157623
BMERB1	1.1252	1.72027e-05	0.000247006
L1CAM	1.12232	0.00109809	0.00626006
ZFYVE28	1.12204	1.72191e-05	0.000247006
TMOD2	1.1203	0.00605542	0.0241782
LARP6	1.11948	0.000908637	0.00542097
FAM131C	1.11833	0.00381068	0.0167713
FAM78A	1.11737	0.00180457	0.00927311
HOXD11	1.11673	0.0126512	0.0428487
ZSWIM4	1.11604	1.89597e-05	0.00026396
ZNF521	1.116	0.00976266	0.0349188
NCKAP5L	1.11569	1.22106e-05	0.000188174
ZNF358	1.11505	0.00597453	0.0239189
ADAM19	1.11504	0.00883164	0.0322926
TUBB2B	1.1145	0.0114404	0.0395737
KAZN	1.11386	7.22576e-05	0.000746728
WBP2	1.11217	4.04037e-08	2.454e-06
TTC36	1.11151	0.0123904	0.0421566
TMEFF1	1.10872	0.00779761	0.029323
ZBTB47	1.10814	0.000404889	0.00289708
TLR3	1.10812	0.00773401	0.0291499
ANKRD34B	1.1069	0.0113177	0.0392402
PNRC1	1.10657	0.0011266	0.00637575
SYTL2	1.10603	0.0109364	0.0381842
FAM222A	1.10544	0.000933276	0.00552164
ROGDI	1.10473	0.000698654	0.00442451
IL11RA	1.10429	8.13306e-09	7.06111e-07
IFIT2	1.10279	0.0101286	0.0359691
SCN1B	1.10252	0.000746245	0.00465226
GRINA	1.10242	0.00807576	0.0300956
HLA-C	1.10203	0.000248927	0.00197096
TRIM62	1.10163	3.58393e-07	1.28651e-05
TNS2	1.09994	6.23038e-05	0.000665034
FAT4	1.09896	0.00186458	0.00948358
VEGFB	1.09747	0.000963002	0.00565717
PDE6B	1.09746	0.00664159	0.0259156
C2orf81	1.09617	0.00607965	0.0242358
PDLIM4	1.09553	0.00732204	0.0279251
BICDL1	1.09516	0.0117503	0.0404804
TEAD2	1.09468	4.03071e-11	1.00318e-08
PNPLA2	1.09352	0.00328019	0.0148925
HOXB5	1.09324	0.0014761	0.00793757
SEMA5A	1.09319	0.00911266	0.033037
ADAMTSL5	1.09169	0.0144562	0.047258
CHADL	1.09142	0.00713211	0.0273789
EGFL7	1.09077	0.000366871	0.00269213
PLXND1	1.08954	8.42078e-05	0.000844509
FHL3	1.08827	0.000100689	0.000968183
DENND2B	1.08788	1.25116e-07	5.6617e-06
ATP7B	1.08616	7.97273e-05	0.00080936
FAM89B	1.08452	0.00125618	0.00698642
FYN	1.08415	4.32871e-08	2.58562e-06
FKBP7	1.08405	3.03773e-08	2.01726e-06
ADGRF4	1.08401	0.00881692	0.0322546
C8orf82	1.08327	0.0046792	0.019683
CCDC106	1.08237	0.000839954	0.00508845
ICAM1	1.08116	0.00154102	0.00816973
MICALL2	1.0795	0.000372107	0.00272165
CASTOR2	1.07925	0.000238363	0.00190244
CACNB3	1.07714	8.42787e-08	4.2831e-06
TP53INP1	1.07699	0.0011346	0.00640565
NLGN3	1.07479	0.0122208	0.0417223
PTK2B	1.0745	0.00157128	0.00829405
MAMSTR	1.07446	4.34675e-05	0.000501412
CDON	1.07415	0.000705005	0.00445528
OLFML2B	1.07269	0.000606754	0.00395662
EPHX1	1.07199	6.0792e-05	0.000653098
MAPK8IP3	1.07036	5.65576e-09	5.18144e-07
AHRR	1.0701	0.012566	0.0426571
SOX15	1.06987	0.00247533	0.0119047
SMIM3	1.06864	0.00168937	0.00879919
MARK4	1.0678	0.000857498	0.00516957
DNM1	1.06748	0.00192809	0.00973697
MAGED4	1.06698	0.000115829	0.001073
ADAMTSL1	1.0669	0.0153072	0.0494447
ABCD1	1.06665	0.000879604	0.00527939
SOWAHB	1.06641	0.00809865	0.0301288
EHD3	1.06564	4.04895e-06	8.12674e-05
ZCCHC24	1.06498	0.000101964	0.000977669
APP	1.06488	3.05298e-08	2.01726e-06
TTYH3	1.06334	0.000122941	0.00112286
NUMBL	1.0627	0.00394669	0.0172479
JAM2	1.06242	0.00273134	0.012891
CELSR3	1.06083	0.00298616	0.0138099
PIGP	1.06026	8.48112e-05	0.000848304
DNAJB5	1.06018	7.12706e-07	2.21265e-05
SESN2	1.06009	0.00104099	0.00600916
NISCH	1.05974	1.72848e-06	4.15641e-05
QPRT	1.05807	0.00418574	0.0180236
P2RY6	1.05691	0.0137982	0.0456812
MEIS3	1.05677	4.16077e-05	0.000485033
ANO8	1.05666	0.00215568	0.0106351
CCDC102A	1.05547	0.00437556	0.0186793
LAMA5	1.05502	0.000501537	0.00342289
RNF207	1.05492	6.96365e-05	0.000726682
LPAR2	1.05384	0.000424324	0.00300875
BOC	1.0537	0.000585639	0.0038458
WIPI1	1.05232	0.000150803	0.00131385
GSN	1.05187	4.94846e-10	7.17431e-08
DTX3	1.05017	0.000776567	0.0047959
C1RL	1.04916	1.86507e-05	0.000261023
YPEL2	1.04883	0.00561745	0.022764
SIDT2	1.0465	1.88675e-05	0.000263316
SLC9A5	1.0437	0.00132922	0.00730021
PLPP1	1.04347	0.000347756	0.00257591
PLSCR3	1.04099	0.000812051	0.00495965
DNAJC4	1.0408	0.0010523	0.00606014
CRAT	1.03937	0.000103568	0.000990759
CYB5D2	1.03779	1.47985e-08	1.14509e-06
DENND6B	1.03734	0.000112438	0.00105203
ZDHHC1	1.03469	0.0124062	0.042201
METRNL	1.0328	0.00840794	0.0310091
COX6B2	1.03279	0.0122987	0.0418996
FKBP10	1.03262	7.98304e-07	2.40344e-05
DNAJC28	1.03248	0.00365561	0.0162178
THAP8	1.03181	0.000122684	0.00112178
PALLD	1.03122	0.00180074	0.0092598
TNFSF13	1.02692	0.00473138	0.0198744
APOBEC3F	1.02603	5.64849e-08	3.09197e-06
WAS	1.02555	0.00938461	0.0338095
HYAL3	1.02484	0.000133424	0.00119235
IQSEC2	1.02196	0.00069404	0.00440276
STXBP1	1.02117	0.000150046	0.00130931
CDC42BPG	1.02079	0.0108592	0.0379766
SLC22A3	1.01993	0.00891835	0.0324926
MAL2	1.01803	0.0118004	0.0406213
SV2A	1.01788	0.00713989	0.0273946
SPX	1.01766	0.010015	0.0356674
PANO1	1.0172	0.00120493	0.00675168
PLXNA3	1.01662	0.00550566	0.022473
CNTNAP3	1.01575	6.55686e-05	0.000692458
PPP2R5B	1.01572	0.000257698	0.00202006
AMIGO3	1.01521	0.00189334	0.0096102
TMEM8B	1.015	3.40407e-05	0.000415036
SNCA	1.01437	0.00459422	0.0193965
SREBF1	1.01393	0.000194747	0.00161564
MXRA8	1.01358	0.00253735	0.0121521
PCDHGB6	1.01315	0.00295254	0.0136834
ZNF385A	1.0113	0.00761227	0.0288001
SEMA6C	1.00935	3.09861e-05	0.000384316
TMEM80	1.00927	2.32028e-06	5.21818e-05
ZNF362	1.00821	7.95194e-05	0.000807798
MR1	1.00715	0.00351193	0.0156689
SLC4A5	1.00642	0.000656107	0.00421767
KIFC2	1.00596	0.000399696	0.00287313
MAP2	1.00491	0.0100137	0.0356674
RPS6KA2	1.00459	0.00228809	0.0111561
KIAA1522	1.00396	0.000144401	0.00127293
LTB4R	1.00327	0.000337883	0.00252154
ZNF503	1.00269	0.00577236	0.0232841
IFI16	1.00134	0.00267357	0.0126744
CADM4	1.00085	6.26341e-05	0.000667606
PIK3R2	1.00082	0.000175375	0.00147626
TRIM16L	0.99911	0.00331304	0.0150102
GPR137	0.998687	1.8188e-05	0.000256955
LGALS3BP	0.998653	6.90059e-06	0.000123705
ATP2A1	0.997342	0.011626	0.040132
ULK1	0.996881	0.000513305	0.00347785
ANOS1	0.996198	0.00368106	0.0163017
ARHGEF6	0.996088	0.000553646	0.00369419
CCDC24	0.993719	0.000148742	0.00130349
TMEM92	0.993559	0.00404313	0.0175552
PCDHGA2	0.99281	0.00157894	0.00832271
CCDC92	0.992466	0.00328658	0.014913
MZF1	0.992086	0.012037	0.0412834
PLOD1	0.991897	1.38439e-05	0.000208819
WDTC1	0.991034	1.42715e-06	3.6368e-05
BCL2A1	0.989131	0.00313465	0.0143456
TGFB1	0.988139	0.00961658	0.03448
SLC16A13	0.987175	0.000342981	0.00255194
NDRG4	0.987087	0.000451553	0.00315789
SKIDA1	0.986503	0.0016839	0.00877687
TTC3	0.98638	4.76981e-11	1.11472e-08
C6orf132	0.986353	0.00181188	0.00929788
ANG	0.986304	0.00445718	0.0189411
TGFBI	0.984437	0.00148207	0.00795819
SLC25A23	0.983888	0.000177282	0.00148811
SPRED3	0.983833	0.00121312	0.00678231
YPEL1	0.983632	0.00581674	0.0234002
AGBL5	0.982713	1.31211e-06	3.43751e-05
PHLDB3	0.981729	0.0113368	0.039279
NPIPB3	0.981184	0.00134667	0.00737162
NOVA1	0.981118	0.000439642	0.00309095
FAM189B	0.981104	0.00165367	0.00864949
ROM1	0.980524	0.00197493	0.00991647
LYNX1	0.980243	0.00285087	0.0133246
SH3BGRL	0.979948	1.98869e-09	2.30211e-07
DAPK1	0.979774	0.000617494	0.00401788
TRO	0.978891	8.44428e-05	0.000846133
TGFB1I1	0.978796	0.00112717	0.00637579
PIP5K1C	0.978576	0.000211279	0.00172689
CLDN15	0.978518	0.000349414	0.00258489
TMEM187	0.975949	0.000131761	0.00118103
CCDC40	0.975083	0.00256418	0.0122452
DNAH1	0.974792	0.00460867	0.019441
PACS1	0.974785	0.00108782	0.00622155
ALAD	0.974121	1.76585e-06	4.21237e-05
SOX12	0.973673	2.66197e-05	0.000342552
NME4	0.973485	0.00345674	0.0154921
TMEM91	0.973289	0.0107424	0.0376652
TNFRSF10D	0.972489	0.00387498	0.0169991
KLC4	0.971394	5.48276e-08	3.055e-06
PCMTD1	0.97028	8.77174e-05	0.000868048
TCIM	0.969996	0.00821956	0.0305224
MAGED1	0.969778	3.0454e-07	1.15424e-05
SLC22A18	0.969505	0.00560491	0.0227193
S1PR2	0.969354	2.2082e-05	0.000295741
LY6E	0.968937	0.000760132	0.00471977
TRIM46	0.964962	0.00011552	0.00107213
FAM214B	0.964354	0.00277882	0.0130614
HERPUD1	0.963671	4.45438e-07	1.52213e-05
TMEM217	0.962341	0.000618539	0.00402118
IFNGR2	0.961551	2.03426e-13	1.44655e-10
HMG20B	0.961089	2.37796e-05	0.000313971
GPX3	0.960352	0.0139661	0.0461305
SLC26A11	0.959022	0.000841695	0.0050928
VAMP2	0.958946	0.00230205	0.0112085
ARRB1	0.95877	0.000245478	0.00194882
LPXN	0.958291	0.000525386	0.00353724
SYVN1	0.957454	0.000714414	0.00449383
RRAGB	0.95732	4.54522e-05	0.00051812
RAB9B	0.956998	0.00109069	0.00622991
APOM	0.956094	0.0105835	0.0372394
LAMB2	0.955731	1.99159e-05	0.000274278
PITPNM1	0.954851	0.000877701	0.00527009
MMP24	0.953869	0.0066843	0.0260444
MAN2B2	0.953391	0.000346541	0.00257074
AKT1S1	0.952976	0.000567376	0.00375806
USP20	0.952058	0.000124774	0.0011349
PINK1	0.950618	9.37177e-06	0.000156717
GAL3ST4	0.950544	0.00239899	0.0115966
PLEKHH3	0.950513	0.0001581	0.00136627
PDE4A	0.950401	1.15456e-05	0.000181104
TMEM175	0.949067	0.00356187	0.0158632
PDLIM2	0.948607	0.00633151	0.0249732
SIX5	0.947959	0.00364267	0.0161748
MYL5	0.947888	1.72362e-05	0.000247013
RTL8C	0.947813	0.00348622	0.0155822
IFITM2	0.947426	0.000252369	0.00198691
TTC28	0.947409	0.00215579	0.0106351
ENDOV	0.947321	0.000874255	0.00525151
CA12	0.945473	0.00193625	0.00977483
TSPYL2	0.945227	2.6735e-07	1.03967e-05
JAZF1	0.944444	0.00146815	0.00790049
DAB2IP	0.943773	2.83436e-05	0.000360831
EPB41L1	0.940933	0.00148265	0.00795844
TGFB3	0.940502	9.50209e-05	0.000923193
IL10RB	0.940053	6.67037e-10	9.30922e-08
IFT27	0.939198	0.00651379	0.0255169
SNAI2	0.938139	0.000415184	0.0029594
BMT2	0.937631	1.74753e-06	4.18204e-05
S100A4	0.936438	0.00891905	0.0324926
LRFN3	0.936294	0.0094715	0.0340486
CSAD	0.93608	9.60082e-06	0.000158946
NECTIN2	0.934442	3.8339e-05	0.000455101
UBALD1	0.933993	0.0134818	0.0449282
TRAPPC6A	0.933708	0.00753361	0.0285531
CKAP4	0.93329	0.00282753	0.0132445
PIK3AP1	0.93307	0.00401742	0.0174853
FILIP1L	0.931241	9.75063e-06	0.00016084
HOXD10	0.930746	0.00820108	0.030472
PLA2R1	0.930447	1.01485e-05	0.000165264
PGGHG	0.930049	0.00106415	0.00611424
BTBD19	0.929209	0.00393421	0.0172034
HEG1	0.929191	0.00379445	0.0167245
DIPK1B	0.928835	0.00486085	0.0203325
CIART	0.928376	0.00928852	0.0335524
CHST2	0.928062	0.000488421	0.00335184
PDCD4	0.928045	0.00238636	0.0115437
MOSPD3	0.927166	0.00540576	0.0221447
FMN1	0.926912	0.00181669	0.00931298
LDOC1	0.926779	1.3142e-05	0.000199643
KDM6B	0.926103	0.0061785	0.0245121
JDP2	0.925732	0.00215188	0.0106228
FCGRT	0.925507	0.000871405	0.00523649
PCDHGB7	0.925359	0.00152882	0.00813029
SMPD1	0.922558	0.00116295	0.0065426
ZYX	0.922392	0.00431175	0.0184597
YIPF2	0.921329	7.64265e-05	0.000782233
SSBP3	0.921212	1.09698e-12	6.30044e-10
DDAH2	0.920951	9.86778e-06	0.000162107
D2HGDH	0.919472	3.01332e-07	1.14791e-05
TNRC18	0.917969	0.000910588	0.00543043
ANK2	0.917219	0.00177042	0.00914912
MMP15	0.916605	0.00533938	0.0219348
CBLB	0.916144	5.72213e-05	0.000620992
CDRT1	0.91466	0.0148734	0.048336
TMEM129	0.914251	0.00225871	0.0110335
AQP11	0.911655	0.00649802	0.0254618
ARHGEF40	0.911415	0.0120633	0.0413451
TMEM184B	0.911103	0.000183771	0.00153912
C7orf31	0.910745	0.000512074	0.00347266
TENM3	0.910061	0.00388228	0.0170262
AHDC1	0.909998	5.56047e-05	0.000607421
SMAD3	0.908817	4.24097e-05	0.000492461
CIC	0.906815	0.000476811	0.00329334
ARSA	0.905982	1.20996e-06	3.27324e-05
TIAM2	0.905408	0.00397492	0.0173256
TSC22D4	0.904307	0.00015606	0.00135334
CXADR	0.904156	0.00137375	0.0074979
QSOX1	0.903139	0.00616548	0.02448
PHLDB1	0.90292	3.93394e-05	0.000464025
SPOCK1	0.902428	0.000858009	0.00517056
PCDHGB4	0.901663	0.00432759	0.0185063
CEACAM19	0.901085	0.0104229	0.0368042
HSPA2	0.897293	0.0106288	0.0373546
ING4	0.896811	0.000131452	0.00118038
PBLD	0.896184	6.94067e-05	0.000725297
ITGA1	0.895505	0.00427785	0.0183514
FAM171B	0.894944	0.000844551	0.00510595
IFT140	0.894501	1.92899e-07	8.00156e-06
CGNL1	0.893458	0.0153245	0.0494896
CDKN1A	0.893152	1.35269e-05	0.000204658
FBXL19	0.891585	0.000159328	0.0013737
C11orf68	0.891347	1.35885e-05	0.000205382
PIP5KL1	0.891254	0.00607416	0.0242334
CNTNAP1	0.890331	0.00396945	0.0173169
BCAS3	0.890163	6.24806e-06	0.000114341
NCOR2	0.889309	0.00699522	0.0270131
CTSD	0.887439	0.00882881	0.0322901
C12orf57	0.886944	0.00140197	0.00760742
EVA1B	0.885314	0.00629358	0.0248589
PLXNB2	0.884907	0.000311016	0.00236718
OBSCN	0.884505	6.22449e-05	0.000664881
ACSS2	0.883281	0.000837496	0.00507929
PLTP	0.88228	0.00375882	0.0165919
BAHCC1	0.880955	0.000264483	0.00206026
KIAA0513	0.878783	0.000380931	0.00277215
ZSCAN18	0.878287	0.00196036	0.00986655
ASIC1	0.877818	0.00461502	0.0194623
SLC40A1	0.877769	0.0011027	0.00627778
SLC4A3	0.877325	4.49818e-05	0.000513935
ZNF425	0.876658	2.28772e-08	1.61144e-06
SERPINH1	0.876646	0.00327618	0.0148793
PGAP6	0.874346	0.000403422	0.00288997
GFUS	0.874124	1.22716e-11	4.26165e-09
APOBEC3C	0.873212	0.000112884	0.00105422
FANK1	0.872818	0.00366039	0.0162294
GPR155	0.871965	0.00332515	0.0150605
ATN1	0.871931	0.00149227	0.00799861
SUFU	0.871557	1.46203e-05	0.00021789
VAMP1	0.871102	0.00384783	0.0168999
FAM102A	0.870905	0.00596205	0.023901
PRSS23	0.870024	1.20428e-05	0.00018655
BNIP3L	0.86991	4.98559e-05	0.000557259
LTBP4	0.869769	0.00948212	0.0340704
MED25	0.869655	0.0019596	0.00986606
SCD5	0.869643	0.0101044	0.0359088
HGSNAT	0.869411	8.97589e-07	2.62178e-05
PLAU	0.86931	0.00173534	0.00901038
MED12	0.868831	3.32921e-11	9.2065e-09
PGLS	0.868826	0.00202831	0.0101271
HOXA2	0.868486	0.00751696	0.0285045
ITSN1	0.868284	4.61195e-10	6.81883e-08
CLIP2	0.867893	1.01173e-05	0.000165116
RABL2A	0.866745	2.11037e-05	0.000285387
ETHE1	0.866659	0.000458321	0.00319818
FBXL2	0.866353	0.000127276	0.00115118
DBNDD1	0.8662	0.00255295	0.0122035
INKA2	0.865573	0.00199524	0.0100017
GPSM1	0.864854	0.0102906	0.0364493
CDIP1	0.863925	0.00410837	0.0177775
MAN2B1	0.863858	2.15075e-05	0.000289083
PHETA1	0.863781	0.00464232	0.0195533
NINJ1	0.862919	0.0120568	0.0413325
SH3PXD2A	0.862903	0.0041301	0.0178457
APOBEC3G	0.861724	0.0132054	0.0442713
YPEL5	0.86153	8.20878e-05	0.000828255
PRMT2	0.858044	4.14035e-15	6.18278e-12
SMYD3	0.857717	0.00452076	0.0191568
ERBB2	0.857238	6.41204e-07	2.05034e-05
ALDH1A3	0.856045	0.0056468	0.0228581
TMEM38A	0.855717	0.00239653	0.0115892
MRGPRX3	0.854251	0.00180313	0.00926891
PABPC1L	0.853626	0.000813051	0.00496171
EVL	0.85268	0.0105575	0.0371741
AMT	0.85199	0.012586	0.0426959
NCOA7	0.850549	0.00776299	0.0292223
PTK7	0.85022	0.000118077	0.00108723
FLYWCH1	0.849801	0.000477197	0.00329449
TRAM1	0.848849	0.00164894	0.00862775
HAPLN3	0.8485	0.00832501	0.0307945
CSTB	0.848379	8.78434e-08	4.4019e-06
ROBO3	0.847696	0.00743913	0.0282812
C3orf18	0.847341	0.00210236	0.0104336
RUSF1	0.846875	8.18969e-13	4.89187e-10
ZNRF1	0.844391	6.31192e-06	0.000115194
UBXN6	0.843625	0.000467486	0.00324899
LRCH4	0.843115	0.000215893	0.00175787
CTSO	0.84248	0.00681393	0.0264468
PARP10	0.84221	0.0152344	0.0492653
FRAS1	0.841292	0.00213459	0.0105584
GMIP	0.84052	0.00970389	0.0347418
ACBD4	0.840517	0.000290334	0.00223022
LDB1	0.838591	7.52596e-06	0.000132975
CACFD1	0.838477	0.0131134	0.0440178
KDM4B	0.838472	1.14634e-05	0.000180003
DHRS12	0.837768	0.0071255	0.0273605
HOXA6	0.836245	0.00142622	0.00770543
CYB5R3	0.835843	0.00322858	0.0146989
DRAM1	0.835554	0.00742815	0.0282466
PTP4A3	0.835479	0.0143201	0.046939
G6PD	0.834629	8.26143e-06	0.000142622
TIMP2	0.833807	4.18651e-05	0.000487274
FAM234A	0.832176	1.47505e-05	0.000219611
RECK	0.831061	0.00453663	0.0192099
RFNG	0.829806	0.0129898	0.0436982
TMEM53	0.826772	0.00146209	0.00787925
P3H1	0.824877	0.00212582	0.0105255
S1PR3	0.824683	0.00540474	0.0221447
FBXL7	0.824619	3.41301e-05	0.000415036
BCKDHA	0.823413	1.64403e-05	0.000240161
ELAPOR1	0.823207	6.03531e-06	0.000110824
CAPN5	0.822956	0.00027588	0.00213568
FADS2	0.821889	0.00759448	0.0287474
KLHL3	0.820556	0.000510624	0.00346755
SLC29A2	0.818568	0.00451251	0.0191327
FCHSD1	0.817491	0.00151549	0.00808357
SSH3	0.817473	0.000243185	0.00193472
FBLIM1	0.816928	0.000130603	0.00117545
BLVRB	0.815857	0.000561944	0.00373543
MARCKSL1	0.815022	0.000222699	0.00180052
CRELD1	0.813694	8.67967e-05	0.000860647
TBC1D10A	0.813618	0.00586311	0.0235803
RRAS	0.812919	0.0112744	0.0391325
ALDH2	0.812791	0.00205296	0.0102292
TENM4	0.81244	0.00328109	0.0148925
CCDC28B	0.811289	0.000398691	0.00286785
CYHR1	0.810095	0.000217379	0.00176707
DNASE1L1	0.809967	0.0131954	0.0442602
SH3D21	0.808951	0.00808723	0.0300956
PCGF2	0.80816	0.0120323	0.0412769
PCED1A	0.807987	0.000501067	0.00342132
BCL2L2-PABPN1	0.807669	0.0141462	0.0465094
YBEY	0.807322	9.49695e-07	2.72203e-05
ARL8A	0.806836	0.00036296	0.00266868
GAMT	0.80599	0.00819671	0.0304633
NAPA	0.805897	2.43918e-05	0.000319511
MANBA	0.805853	0.000512308	0.00347267
SNX29	0.805487	0.00453715	0.0192099
OPLAH	0.805464	0.00316139	0.0144458
PLEKHA4	0.805417	0.0103335	0.0365578
TMEM63B	0.804855	0.000721023	0.00452396
ZBTB4	0.804583	0.000161997	0.00139189
TSPAN15	0.80386	0.00157057	0.00829327
MCOLN1	0.802915	0.00806505	0.0300713
TMEM143	0.801396	0.000623256	0.00404304
NFKBID	0.801372	0.00559494	0.0226913
WASHC3	0.800987	0.000329097	0.00246707
MEX3B	0.799844	0.000848007	0.00512269
RCAN1	0.799566	0.0100448	0.0357481
SSBP2	0.798619	0.00013176	0.00118103
SLC37A1	0.796544	0.000886943	0.0053149
CCDC69	0.794767	0.00777946	0.0292621
KCTD11	0.794691	0.000674027	0.00430713
PARD3B	0.793949	8.41e-05	0.000844509
MAML2	0.792711	7.32728e-06	0.00013026
FADS3	0.792283	0.00161327	0.00847976
ZNF513	0.791901	0.000811345	0.0049594
BNC2	0.790919	0.00205257	0.0102292
LRCH2	0.790878	0.000110766	0.00103964
SPSB3	0.789608	0.000201698	0.00166223
CDH13	0.789514	0.000999155	0.00583055
PKD2	0.788139	0.000738404	0.00461557
ARNT2	0.787575	0.00183223	0.0093765
SNX21	0.785939	0.000421873	0.00299696
CMIP	0.785912	0.00233476	0.0113493
CFAP70	0.784346	0.00852271	0.0313549
PNKD	0.783927	1.0617e-05	0.00017066
NR2F2	0.78026	0.000396867	0.00285748
BCL6	0.779984	1.19214e-05	0.000185633
ZNF821	0.779232	0.00050425	0.00343364
SPACA9	0.779002	0.000822375	0.00500795
PLEKHG5	0.776483	0.00825822	0.0306233
ATP5PF	0.775628	2.56127e-05	0.00033201
ANTXR1	0.774787	8.86139e-05	0.000874601
VAT1	0.77401	0.000624341	0.00404832
ATG2A	0.773668	0.00020874	0.00170895
PLEKHG4	0.772683	0.0114353	0.0395652
GRAMD1A	0.772564	0.0116901	0.0403066
PNPLA3	0.772489	0.0144644	0.0472641
DHRSX	0.772484	0.0074714	0.028375
TNFRSF1A	0.772363	2.90076e-06	6.21478e-05
EVC	0.77215	0.00254603	0.012178
RAB5B	0.771777	3.08894e-07	1.16483e-05
APBB2	0.771599	0.000517115	0.00349731
FAM228B	0.770886	0.00745316	0.0283129
LAMA2	0.7708	0.00411917	0.0178128
PLCD3	0.770416	0.00262578	0.0124875
GABARAP	0.770404	0.000942401	0.00555582
PKIG	0.769911	1.43878e-05	0.000215499
ADGRL2	0.769818	0.00547143	0.0223665
C11orf54	0.769633	0.0127012	0.04295
TRIM16	0.769526	0.00346506	0.01552
RAB40B	0.7691	0.00787968	0.0295721
FBXW5	0.767937	0.000197156	0.001632
RERE	0.767897	0.000324143	0.00243728
KCNK6	0.767102	0.00888707	0.0324317
CD276	0.766485	3.42891e-05	0.000415953
TAPBP	0.76609	0.000124623	0.0011349
L3MBTL1	0.765717	0.00494446	0.0206302
ATAT1	0.765475	8.76615e-06	0.000149037
CCDC136	0.765027	9.62346e-07	2.74921e-05
GBP1	0.764388	0.00295221	0.0136834
SALL2	0.763537	0.000713441	0.0044931
CTNS	0.76352	0.00877371	0.0321122
CCDC189	0.763455	0.00832767	0.0307967
ARHGEF17	0.763301	2.67551e-06	5.88415e-05
SMIM14	0.762506	0.000376554	0.00274833
TOM1	0.762409	0.00134249	0.00735687
LSS	0.762323	1.71343e-05	0.000246737
NPAS2	0.762223	0.0070924	0.0272966
WHRN	0.761593	9.27599e-05	0.0009055
STAT2	0.761518	0.0135564	0.0451266
GDPD1	0.761454	2.03625e-07	8.26306e-06
SYNE1	0.761332	0.0132157	0.0442713
BACH1	0.760422	0.00349913	0.0156257
HSPA12A	0.760122	0.0119064	0.040939
VSIG10L	0.758938	0.00315621	0.014431
HPS1	0.75833	0.000318492	0.00241178
SNRPN	0.757419	0.000924879	0.00549371
MOB3C	0.757263	9.57735e-06	0.000158733
SLC25A34	0.756755	0.0011642	0.00654554
TRAPPC1	0.755648	0.00151495	0.00808357
SMO	0.755587	0.000606274	0.00395662
AGPAT3	0.755543	2.35998e-09	2.55373e-07
RNF5	0.754963	1.13789e-05	0.000179621
DNAL4	0.75455	1.60876e-05	0.000235989
AGPAT1	0.754384	6.04105e-06	0.000110824
RNF44	0.753648	0.00231481	0.011267
HOXA5	0.753115	0.0137326	0.0455406
ARHGEF3	0.752861	0.000790569	0.00486427
ACOT8	0.752054	0.00129188	0.00713977
NRIP1	0.75178	0.00095966	0.00563975
NBDY	0.751187	0.00285387	0.0133344
NUCB1	0.75113	0.00094189	0.00555499
INPPL1	0.750655	0.00913116	0.033088
AK9	0.750275	0.00965964	0.0346249
GLMP	0.750197	0.00153397	0.00815052
PCED1B	0.749433	0.00312337	0.0143028
RARA	0.749413	0.0041036	0.0177672
RFX1	0.748719	0.00438509	0.0186986
DNAJC30	0.748455	0.00501528	0.0208558
EPS8L2	0.748045	0.00639523	0.0251713
ZMYM3	0.747936	1.15205e-14	1.32335e-11
TTLL3	0.747569	0.00218499	0.0107543
CC2D1A	0.746896	0.000121052	0.00110968
EFNB1	0.746752	0.0109176	0.0381451
GNAI2	0.746711	4.52967e-05	0.000516743
HOXB9	0.745864	0.000905366	0.00540793
YIPF3	0.744965	0.000269352	0.00208947
C20orf96	0.744225	0.00015507	0.00134632
HSPB8	0.743488	0.000239826	0.0019131
DVL3	0.743033	0.000129933	0.00117096
POLD4	0.742928	0.0094182	0.0338978
TTC21A	0.742839	0.0113204	0.0392402
RNF187	0.74282	0.00246325	0.0118581
LITAF	0.742285	0.0121405	0.041534
HOXB3	0.742063	0.00232193	0.0112943
RHBDF2	0.742016	0.000979951	0.00573642
CUL7	0.741701	1.15655e-23	1.72708e-19
TP53	0.739624	2.72068e-14	2.53925e-11
SEC14L2	0.739538	5.12436e-05	0.000566831
ST6GAL1	0.739385	0.000617292	0.00401788
HDAC10	0.738225	0.0111076	0.0386463
CBX7	0.737876	0.00211293	0.0104686
HOXA7	0.737464	3.14301e-05	0.000387889
TMEM44	0.736566	0.00038814	0.00280818
NDST1	0.736465	0.0106144	0.0373182
CCDC88B	0.73563	0.0111217	0.0386862
TSPAN9	0.735177	1.41521e-06	3.62492e-05
TRAPPC9	0.733328	4.79173e-07	1.6116e-05
SLC9A1	0.732344	0.00235747	0.0114373
SLCO1A2	0.732254	0.00399981	0.0174137
PIGV	0.732219	0.000442958	0.00310695
SSPN	0.732124	0.00741558	0.0282132
PDXK	0.732069	8.14011e-06	0.00014118
NPEPL1	0.73058	0.0020862	0.0103637
NXN	0.73009	0.00751041	0.0284869
FBXO41	0.729344	0.0112785	0.0391325
ALPK1	0.728158	0.00757513	0.0286814
CNNM2	0.7277	0.000784973	0.00483382
WWC3	0.726591	0.00741298	0.0282105
TMEM47	0.726246	0.00402177	0.0174941
PIM1	0.725819	0.00292439	0.0135789
DMPK	0.725148	0.00753274	0.0285531
SEPTIN9	0.725036	5.14933e-08	2.94617e-06
FBRS	0.725005	0.00270362	0.0127804
C2orf68	0.723975	3.36304e-07	1.23072e-05
MRTFA	0.72369	0.00157284	0.00829937
FAM193B	0.723551	0.00448451	0.0190248
COQ8B	0.723284	4.6354e-07	1.56962e-05
SLC35E2B	0.721358	1.58628e-06	3.89672e-05
MICAL1	0.720894	0.000999609	0.00583092
MS4A4E	0.720094	0.0079735	0.0298342
BHLHE41	0.718985	0.00208209	0.0103502
FKBP8	0.71884	0.000673076	0.00430636
SPATS2	0.718724	0.00018465	0.00154561
PHLDA3	0.71853	0.00519951	0.0214583
BTBD2	0.718368	0.0109316	0.0381763
CTSK	0.716546	0.00836763	0.0309138
IDS	0.716069	3.02243e-05	0.000377969
PPP1R3F	0.715733	0.000601095	0.00393173
HBP1	0.715503	0.00407617	0.0176689
SIRT2	0.715482	8.05738e-05	0.000815735
KLF9	0.715252	0.0027767	0.0130597
DISP1	0.714667	3.07948e-05	0.000382896
HSF1	0.714088	0.00241743	0.0116719
MLLT11	0.713482	0.00529879	0.021798
MAGEH1	0.713454	0.0045557	0.0192829
HLA-A	0.712857	0.00789313	0.0296077
RALGDS	0.712853	0.00634505	0.0250125
EFNA4	0.712612	0.00545231	0.0223067
ISYNA1	0.711956	0.000442107	0.0031039
TANC1	0.711588	0.00269511	0.0127523
RTL8A	0.711334	0.00263121	0.0125053
SPATA7	0.71087	0.00612965	0.0243961
MAGI2	0.710583	0.00254589	0.012178
BDH2	0.710383	0.00179477	0.0092452
PVRIG	0.710347	0.00978747	0.0349907
PRKACA	0.709592	7.32867e-05	0.000753951
TRIOBP	0.708445	0.000396344	0.00285509
FAM8A1	0.707775	2.48361e-05	0.000323627
TMEM50B	0.707729	0.00307318	0.0141336
XYLT2	0.706147	0.010367	0.0366415
BCORL1	0.7057	0.00132254	0.00727153
JMJD7	0.705664	0.000951105	0.00559467
SLC35E2A	0.704844	0.0112749	0.0391325
SAMD10	0.704561	0.00943986	0.0339659
ERICH5	0.704077	0.00907765	0.0329329
HOXB2	0.703528	0.00892106	0.0324926
RPS6KA6	0.703275	4.48407e-05	0.000512715
CTIF	0.701254	0.0114891	0.0397237
ALDH3B1	0.699522	0.0126414	0.042836
MEX3A	0.699062	1.24983e-06	3.32685e-05
APH1B	0.69721	0.00341857	0.0153763
LPAR6	0.695309	0.0022237	0.0108937
DYSF	0.694822	0.00458976	0.0193832
DMWD	0.694122	0.00457188	0.0193149
NDUFV3	0.693761	3.44775e-06	7.19865e-05
ATP6V1F	0.693365	0.00643626	0.0252861
NBEA	0.692794	0.00176139	0.00911392
ZBTB7B	0.692027	0.00260342	0.012393
NICN1	0.691637	1.07659e-05	0.000172682
TMEM59	0.690567	0.000374446	0.00273428
TBC1D3E	0.690279	0.00285034	0.0133246
CAPN1	0.690191	3.85746e-06	7.83721e-05
ZDHHC9	0.688607	0.00260141	0.0123874
CASP9	0.688499	0.00673027	0.0261727
DCAF5	0.687742	7.91373e-07	2.39222e-05
PLEKHG2	0.687139	0.00367049	0.0162645
JMY	0.6868	0.00901527	0.0327714
PRKCZ	0.685816	0.00183429	0.00938386
CDK5	0.685659	0.0010835	0.00620397
FN3K	0.683368	0.0146874	0.0478463
DLG4	0.682882	0.00123092	0.00686894
TLE5	0.682777	0.00924495	0.0334354
PGM1	0.682489	5.69412e-05	0.000618402
PRKD2	0.681965	6.38124e-06	0.000115974
SH3BP5	0.681949	0.00146392	0.0078834
ZNF251	0.68192	1.4023e-05	0.000210881
RHOF	0.681764	0.0133708	0.0446479
TRANK1	0.681691	0.00830374	0.0307457
CCDC85B	0.680563	0.01178	0.0405697
SIN3B	0.680373	0.000168881	0.00143616
GSTA4	0.680261	0.0150285	0.048766
NCSTN	0.679964	3.33113e-07	1.2222e-05
SYT11	0.679163	9.85586e-07	2.80873e-05
STN1	0.679112	9.29186e-05	0.00090595
CLCN7	0.678033	0.00834581	0.0308485
WBP1L	0.677267	0.000207668	0.0017039
GRAMD4	0.676759	0.00214003	0.0105758
AP1G2	0.675658	0.00291523	0.0135406
CCDC149	0.675655	0.0015234	0.00811049
HDAC11	0.675378	0.00197103	0.00990368
USP25	0.675281	1.16222e-07	5.38987e-06
MVB12A	0.674036	0.000609577	0.00397156
VGLL4	0.67376	0.000518135	0.00350165
TRADD	0.673699	0.00872379	0.0319922
TCTA	0.6735	0.00505164	0.0209836
ZBTB12	0.672712	0.00873636	0.0320226
H2AJ	0.672254	0.00280611	0.0131731
VLDLR	0.671457	0.001665	0.00869653
TOB1	0.671456	0.00575048	0.0232086
LRP10	0.671413	0.00706369	0.0272124
BLCAP	0.671044	0.0104323	0.0368199
PXDN	0.670785	0.000471349	0.0032662
SEPTIN6	0.670647	0.00101341	0.00590091
KCTD13	0.667591	0.00711694	0.0273417
FEZ1	0.667129	0.00265501	0.0126064
MC1R	0.664712	0.00413389	0.0178518
CAMTA2	0.664411	0.0012365	0.00689295
ETNK2	0.664215	0.00488562	0.0204133
SHC1	0.66377	0.00133089	0.00730669
HLCS	0.663547	0.00345179	0.0154838
HOOK2	0.663297	0.00927288	0.0335121
DNASE2	0.662944	0.00175008	0.00907227
INO80B	0.662905	0.000803862	0.0049282
SPHK2	0.662094	0.0115583	0.0399166
C11orf49	0.661717	0.00146104	0.00787644
APBB1	0.660996	0.00892116	0.0324926
TUBA1A	0.660314	0.00103599	0.00599362
AP2A1	0.659802	0.011242	0.0390683
ACAP3	0.659424	0.0122385	0.0417474
DGAT1	0.658786	0.00121672	0.00679482
AK1	0.658021	0.00123873	0.00689966
CASKIN2	0.65627	0.01059	0.0372533
LCA5	0.656138	0.00459775	0.0194059
INCA1	0.656085	0.0139145	0.0459842
ACADS	0.654995	0.000830356	0.00504669
ARPC4-TTLL3	0.654447	0.00671051	0.0261094
DOCK6	0.654337	0.00258388	0.0123196
FASTK	0.653849	0.0151677	0.0491321
ATF6B	0.653687	1.5082e-06	3.78519e-05
ATP6AP1	0.653577	0.00551754	0.0225118
PRR14	0.653186	0.0125744	0.0426661
SYNJ1	0.652982	7.33099e-05	0.000753951
TMEM102	0.652855	0.00057497	0.00379745
CACNB1	0.652087	0.00497457	0.0207327
PHF1	0.651449	0.000555197	0.00369958
RDH10	0.6512	0.00932364	0.0336467
RAB4B	0.650645	0.00701335	0.0270621
COL4A2	0.650521	0.00109833	0.00626006
PARP16	0.650161	0.00306114	0.0141086
SAT1	0.649891	0.00701821	0.0270739
CTSA	0.648885	0.00306637	0.0141163
GOLM2	0.648679	0.00011581	0.001073
PNPLA6	0.647207	7.08098e-05	0.00073738
TPTEP2-CSNK1E	0.647188	0.0126483	0.0428487
KIZ	0.646527	0.00318161	0.0145249
ERCC5	0.646413	0.000344057	0.00255739
GALNS	0.64583	1.42212e-06	3.63478e-05
LPAR1	0.645203	0.000322601	0.00243303
DZIP1	0.64295	0.000958924	0.00563764
EHD2	0.642106	0.00106064	0.00609877
PLXNA1	0.642004	0.00989555	0.0353095
CDK20	0.641346	0.00389023	0.0170491
IQSEC1	0.641145	0.00133461	0.00731988
PPARA	0.640848	0.00393828	0.0172161
AGRN	0.640073	0.00375296	0.016571
FBXL20	0.639864	0.00193692	0.00977494
SH2B1	0.639334	0.000395082	0.00285012
TSC2	0.639257	0.000393659	0.00284398
DDA1	0.639102	0.00509445	0.0211028
FIBP	0.638648	0.000233783	0.00187189
PDLIM1	0.637631	0.00406685	0.0176388
OTUD5	0.636349	0.000709699	0.00447927
NHSL1	0.635812	0.00309866	0.0142158
DYNLRB1	0.635129	3.78084e-05	0.000449875
ERG28	0.635071	0.000466652	0.0032457
RGS3	0.634218	0.00178405	0.0092025
DNASE1	0.634125	0.00402762	0.0175144
ZFP90	0.634067	0.000314265	0.00238583
HHAT	0.633621	0.00516845	0.0213501
ZBTB22	0.633325	5.28723e-05	0.000581401
SPPL2B	0.633248	0.00557603	0.0226607
BSCL2	0.632505	0.0136557	0.0453828
SPSB1	0.632468	0.00162595	0.00853436
AZIN2	0.632359	0.00336877	0.0151998
ECH1	0.632246	0.00222425	0.0108937
PGAP3	0.631247	0.000466264	0.00324451
TEAD3	0.631121	0.0035648	0.0158716
PACS2	0.631031	0.00730409	0.0278885
SCRN2	0.630855	0.0018272	0.00935717
OSBPL7	0.630632	0.0082547	0.0306178
BEX3	0.630008	1.84809e-05	0.000259864
LMBR1L	0.629652	5.88305e-05	0.000635853
TK2	0.628542	0.00210596	0.010448
OSBPL5	0.628228	0.000475989	0.00329107
ARHGEF37	0.627915	0.0143946	0.0471297
ARMC7	0.627164	0.00693331	0.0268286
EVA1A	0.627094	0.000515312	0.0034877
SNPH	0.626507	0.00629501	0.0248589
SLFN5	0.626344	0.0040566	0.0175994
TST	0.625928	0.0133409	0.0445796
GSTK1	0.62509	0.00108457	0.00620768
MTHFR	0.624018	0.000365926	0.00268652
BTBD9	0.623873	0.000327142	0.00245859
PLBD2	0.622707	0.000920488	0.00547635
TVP23C-CDRT4	0.622651	0.014918	0.0484601
CAV2	0.621399	1.70065e-05	0.000245317
PTPN13	0.619504	0.00588553	0.0236641
CD99L2	0.619474	0.000322538	0.00243303
ADCY6	0.619105	0.000695553	0.00440875
DBN1	0.617889	0.00316025	0.0144451
TANK	0.617152	1.13067e-05	0.000179049
DOK4	0.616147	0.00775353	0.0292014
KDELR1	0.615897	0.00928421	0.0335449
PTRHD1	0.615503	0.0153597	0.0495606
TPP1	0.613614	0.00798209	0.0298515
CAPNS1	0.613387	0.0011493	0.00647643
NAV1	0.612845	0.0121418	0.041534
ACP2	0.612178	0.00840551	0.0310078
LRRC27	0.611862	0.000487291	0.00334716
ZFPL1	0.611727	0.00661513	0.0258191
MBD5	0.611711	0.000173795	0.00146544
ARSK	0.610695	0.00101688	0.0059133
ZFYVE1	0.610579	0.00286011	0.0133548
GLIPR2	0.610467	0.00642597	0.0252524
B4GALT1	0.609306	2.23382e-07	8.89536e-06
TMEM219	0.609053	0.000839607	0.00508842
ZFP36L1	0.608927	0.012237	0.0417474
CCDC120	0.608378	0.0110484	0.0384943
ANKRA2	0.608281	0.00019362	0.00160898
FAM114A1	0.607787	0.00505749	0.0210021
ATP5PO	0.607606	3.66881e-05	0.000438993
MARCKS	0.60587	0.00284105	0.0132984
GDF11	0.605289	0.000605428	0.00395315
PLEKHM1	0.60458	0.0144343	0.0472174
AKAP8L	0.603565	0.0105735	0.0372129
ATXN2	0.60311	0.00185203	0.00944549
IPO13	0.602694	0.00181625	0.00931298
SNX18	0.602597	0.00791751	0.0296768
ATG13	0.60247	8.68695e-07	2.56368e-05
SMARCC2	0.602275	1.05542e-05	0.0001702
SDK1	0.602258	0.0103094	0.0364983
FAM168A	0.601763	0.000165443	0.00141498
EAPP	0.600565	0.00949002	0.0340905
MEGF8	0.600134	4.10938e-05	0.000480168
PTPRM	0.599858	0.0107769	0.0377595
INPP5J	0.599532	0.0144224	0.047189
MTMR11	0.598931	0.00644256	0.0252936
MBNL2	0.598777	5.59035e-05	0.000610239
BABAM2	0.598582	0.00597427	0.0239189
BBS9	0.598323	0.00191498	0.00969038
USP35	0.5975	0.00762824	0.0288325
ZFAND3	0.597161	0.000711759	0.00448658
DTNA	0.596804	0.000911288	0.00543244
NPRL3	0.595444	0.00504176	0.0209543
TFDP2	0.5943	0.00291208	0.0135344
RFXANK	0.59211	0.00223347	0.0109316
AGFG2	0.592019	0.00550651	0.022473
DGKQ	0.591934	0.0148882	0.0483738
FAM222B	0.591562	0.00343348	0.0154249
LMO4	0.590693	0.00476562	0.0199736

## Sheet: DOWN
Gene Symbol	log2(Trisomy/Normal)	Pvalue(Trisomy/Normal)	Qvalue(Trisomy/Normal)
TADA2A	-0.591084	0.00184301	0.00940912
ZNF17	-0.59131	0.00141431	0.00765991
ODF2	-0.591545	0.00121209	0.00677943
UTP23	-0.591607	4.47426e-05	0.000512378
STK39	-0.591643	0.000405237	0.00289818
SLC35F2	-0.592518	2.26144e-06	5.1191e-05
ERH	-0.592624	1.86336e-06	4.39582e-05
TMEM181	-0.593047	0.00422894	0.0181869
TRMT5	-0.593271	0.000102003	0.000977669
UTP11	-0.593836	2.96654e-05	0.000373204
SMU1	-0.593927	3.55255e-06	7.35787e-05
RPP14	-0.593979	0.00216042	0.0106513
TIMM9	-0.594015	0.00107006	0.00614586
GIN1	-0.594402	0.00178756	0.00921423
GABPB2	-0.59467	0.000358097	0.00263422
TYW3	-0.595353	0.00071394	0.0044931
THUMPD3	-0.596205	0.000258988	0.00202591
ANAPC10	-0.596711	2.43016e-05	0.000318906
EEF1AKNMT	-0.596987	1.86133e-07	7.78577e-06
CEP57L1	-0.59705	0.0034852	0.0155822
MRPL18	-0.597214	0.000114018	0.00106215
TIGD2	-0.597419	0.000748042	0.00465485
CCT3	-0.597555	0.000154125	0.00133967
FAM126A	-0.59767	0.0108283	0.0378777
NUP43	-0.598819	4.49028e-07	1.5309e-05
GTF2H2C	-0.598951	0.00372411	0.0164533
CORO2A	-0.599021	0.00910469	0.0330161
STOML2	-0.599542	0.00182611	0.00935481
CAND1	-0.599722	0.000190395	0.00158837
ADSL	-0.599975	0.00128894	0.00712879
ZNF273	-0.600121	0.00200666	0.0100419
TMEM33	-0.600219	1.50058e-09	1.77843e-07
SRPK1	-0.600559	2.85182e-05	0.000362745
PRDX3	-0.600601	1.53668e-05	0.000226527
VIRMA	-0.600603	0.00016443	0.00140712
BRD9	-0.601017	0.000109862	0.00103245
NIN	-0.601524	0.00628791	0.0248589
KLHDC4	-0.60169	9.38283e-05	0.000913388
RPP30	-0.602101	0.00040165	0.00288081
IARS2	-0.602273	9.91156e-05	0.000955515
GOLT1B	-0.602292	0.0010272	0.00595648
FUT4	-0.603123	0.000927134	0.00550274
ZFP30	-0.603497	0.00379583	0.0167256
SPAG9	-0.604303	0.000542606	0.00363314
IMP4	-0.604549	0.0010708	0.00614771
PIK3R4	-0.604757	5.85475e-06	0.000108729
TATDN1	-0.604765	0.0113427	0.0392905
DCAF1	-0.604878	4.19437e-06	8.39605e-05
GNAI3	-0.604893	2.45012e-06	5.469e-05
DERA	-0.60508	0.00283579	0.013279
RRN3	-0.605136	0.000309036	0.00235571
NRDC	-0.605253	1.49818e-05	0.00022239
EDEM1	-0.605831	0.00179481	0.0092452
EIF2B5	-0.606055	4.6209e-07	1.56827e-05
SLC25A13	-0.606107	0.00291369	0.0135377
ZNF281	-0.606254	0.000174019	0.00146567
ACTR2	-0.606796	0.0119182	0.0409701
RBM17	-0.606928	3.32635e-05	0.000408826
WDCP	-0.607259	0.00258735	0.0123283
EIF1AD	-0.607269	6.44988e-06	0.000116747
LYRM2	-0.607427	0.00131472	0.0072392
ZBTB39	-0.607922	9.13782e-06	0.000153493
NSMCE4A	-0.60879	0.00175589	0.00909808
GTF3C6	-0.609008	0.000499813	0.00341588
PBDC1	-0.609106	0.000163151	0.00139851
NBN	-0.609545	0.00131787	0.00725117
KIAA0586	-0.609821	0.00340157	0.0153184
MDC1	-0.609972	0.00155645	0.00822743
ANAPC4	-0.609988	0.000104811	0.00100073
AASDHPPT	-0.610743	0.000677311	0.0043134
NXT1	-0.610877	0.0144558	0.047258
UTP3	-0.611024	4.65391e-08	2.74691e-06
ZNF280B	-0.611058	0.00692581	0.0268214
NUP133	-0.611212	6.63923e-06	0.000119594
ZNF595	-0.61133	0.00129129	0.00713915
HNRNPK	-0.612157	0.000133901	0.0011959
C12orf4	-0.612255	1.25944e-06	3.34359e-05
EFTUD2	-0.612326	1.24651e-07	5.65777e-06
PRPF19	-0.612661	0.000647996	0.00417457
UHRF2	-0.612752	0.000618446	0.00402118
ZNF28	-0.61288	0.00189571	0.00961568
TMEM18	-0.613053	1.22387e-08	9.87846e-07
DCAF13	-0.613077	3.91337e-05	0.000461963
KBTBD2	-0.613147	1.47996e-08	1.14509e-06
TUBGCP4	-0.6137	7.31502e-05	0.000753347
THADA	-0.613876	2.86988e-05	0.000363494
TOMM70	-0.614173	4.72071e-07	1.59489e-05
PACRGL	-0.614371	0.000658929	0.00423216
ADH5	-0.614668	0.00037009	0.00271442
FAM169A	-0.614768	0.0112667	0.0391325
INO80D	-0.615004	0.00314322	0.0143804
MOB4	-0.615129	1.54584e-06	3.84179e-05
SNRNP40	-0.615217	0.00351821	0.0156912
QKI	-0.615772	0.000187097	0.00156283
CUTC	-0.616255	0.000792699	0.00487536
PPP2R1B	-0.616348	0.000562078	0.00373543
ZCCHC2	-0.617146	6.62134e-06	0.000119416
ZMYM1	-0.617448	0.000558972	0.00371976
CTSL	-0.617508	8.62426e-06	0.000147151
SSB	-0.617706	0.00154666	0.00819015
UHMK1	-0.617831	0.0129756	0.0436602
TRMT6	-0.617833	1.04335e-07	5.001e-06
AKAP12	-0.618716	0.0120161	0.0412402
NUP188	-0.619271	0.00151141	0.00807171
HARS2	-0.619351	0.000269204	0.00208941
PRPF3	-0.619474	1.2321e-05	0.00018968
ERCC8	-0.619556	9.29184e-06	0.00015573
KCTD9	-0.619732	0.0106384	0.0373795
HNRNPR	-0.619805	0.00108838	0.00622234
AIMP1	-0.620279	3.76373e-06	7.70971e-05
SCO1	-0.620337	3.61511e-07	1.29459e-05
BCAS2	-0.620616	3.31419e-07	1.22063e-05
CEP192	-0.621251	0.00481027	0.0201435
CHEK2	-0.621345	0.00307458	0.0141357
ACAT1	-0.621399	0.0010169	0.0059133
UBR7	-0.621589	0.00109712	0.00625794
CENPC	-0.621787	0.00578982	0.0233233
MDM1	-0.622919	0.00206061	0.0102571
UBE2N	-0.623592	1.14216e-05	0.000179731
PTMA	-0.624391	0.00178735	0.00921423
ZZZ3	-0.624435	0.00108954	0.0062266
RSL24D1	-0.624501	0.00646442	0.0253634
SYPL1	-0.624571	4.29688e-06	8.55537e-05
PES1	-0.625977	1.78165e-05	0.000252902
STK4	-0.626153	0.0019674	0.00989865
OGA	-0.626712	0.00150156	0.00803276
PARK7	-0.627142	1.12775e-05	0.000178776
KATNBL1	-0.627334	6.25906e-05	0.000667606
SLC25A40	-0.627412	0.00159584	0.00839701
VDAC3	-0.627461	0.000191221	0.00159417
MTAP	-0.627509	0.00167797	0.00875207
RANBP6	-0.62777	0.000157928	0.00136615
IFRD1	-0.629565	0.0103091	0.0364983
CCNC	-0.629959	0.00762972	0.0288325
SLBP	-0.630583	8.50228e-06	0.000145435
PNN	-0.630953	0.00259671	0.012369
SLC39A10	-0.631591	0.00311322	0.0142694
GRWD1	-0.631674	0.00046756	0.00324899
SLC30A1	-0.632077	1.85721e-06	4.3903e-05
TRMU	-0.632394	0.000737054	0.00460905
ALG6	-0.633085	8.53802e-05	0.000851577
ICMT	-0.63351	1.51264e-06	3.78727e-05
C12orf29	-0.633677	0.000156754	0.00135778
TMEM168	-0.63391	6.66972e-05	0.000702886
TASOR2	-0.633994	0.000163236	0.00139851
MRPS36	-0.634207	0.000256932	0.00201511
SIRT1	-0.634234	0.000233676	0.00187189
CEP76	-0.634516	0.000110973	0.00104028
FAM216A	-0.634554	0.0123778	0.0421234
TMEM199	-0.63461	3.05805e-11	9.13316e-09
TMX1	-0.635176	0.000433792	0.00305976
MPHOSPH10	-0.635185	4.66677e-05	0.000529954
TOP3A	-0.635746	1.82977e-05	0.000257866
NUFIP2	-0.635818	0.000137477	0.00122385
PUS7L	-0.636472	0.00247202	0.0118926
C5	-0.637673	0.0136589	0.0453828
TRA2B	-0.637698	0.000606552	0.00395662
ZFAND1	-0.637997	5.34527e-05	0.000587351
LYN	-0.638655	0.000153621	0.00133611
METAP2	-0.639077	3.61296e-08	2.30276e-06
PRDX1	-0.639834	0.000382475	0.00277661
SDR42E1	-0.639885	0.00347758	0.0155668
AGPS	-0.640034	0.0002987	0.0022886
FAM135A	-0.640186	0.00206305	0.0102658
BEND3	-0.640762	0.00141956	0.00768056
GPD2	-0.640859	0.00465577	0.0195954
COMMD8	-0.641023	0.00101358	0.00590091
STAG1	-0.641283	0.000886574	0.00531482
MTHFD2	-0.642287	0.0117843	0.0405754
RAPGEF6	-0.643097	0.000713997	0.0044931
ATRIP	-0.643479	0.00222282	0.0108937
ZCCHC4	-0.6435	0.000140164	0.00124205
ARPP19	-0.643567	0.00105178	0.00605948
NEDD1	-0.643592	0.000347362	0.00257427
ELK4	-0.644334	0.000108375	0.00102234
ZNF845	-0.644433	0.00500712	0.0208277
ACAT2	-0.644442	0.00876323	0.0320896
NDUFB6	-0.644855	0.000137277	0.00122313
C1QBP	-0.644942	0.000524775	0.00353724
PPA1	-0.6453	0.000236623	0.00189159
SS18L2	-0.64531	2.12815e-05	0.000286561
GTF3C4	-0.645793	7.85899e-06	0.000137583
ATIC	-0.645911	0.000352226	0.0026
EIF4A3	-0.646067	0.000370799	0.00271828
TRMT10C	-0.64696	2.44952e-05	0.000320245
RPA2	-0.647424	9.25172e-11	1.86697e-08
CALM1	-0.647438	1.34623e-06	3.5129e-05
TTF1	-0.647474	5.85796e-05	0.000634351
BDH1	-0.64752	0.0102477	0.0363317
RBBP7	-0.648289	0.000107636	0.0010173
GTF2A2	-0.648428	5.85795e-06	0.000108729
OPA1	-0.648946	0.000507759	0.00345123
BMS1	-0.649007	2.32722e-05	0.000309185
GALNT6	-0.649413	0.00698387	0.0269832
CTDSPL2	-0.649484	0.00598794	0.0239534
TET3	-0.649646	0.000380402	0.00276964
TTC4	-0.650993	3.25403e-05	0.000400597
RIOK2	-0.651007	0.000114607	0.00106564
ASNSD1	-0.651058	1.27979e-07	5.77374e-06
RBM27	-0.651637	0.000208003	0.0017048
ZNF473	-0.652019	2.71396e-05	0.000347578
OTULIN	-0.652073	2.67907e-08	1.82678e-06
SEM1	-0.652088	8.14714e-05	0.000822688
PSMA3	-0.654395	0.000931605	0.00551612
NCBP1	-0.654465	1.77766e-06	4.22704e-05
ZC3HAV1L	-0.654778	0.00112999	0.00638932
ZNF709	-0.655105	0.00250769	0.0120448
MMGT1	-0.655697	1.17249e-09	1.47132e-07
HERC4	-0.655834	0.00350306	0.0156339
GMFB	-0.656009	0.00303722	0.0140157
DLAT	-0.656058	4.98956e-06	9.6049e-05
SEC11C	-0.656098	0.000109537	0.00103005
QSER1	-0.656521	0.000841125	0.0050928
LRRC40	-0.656614	0.00107317	0.006159
C12orf75	-0.656963	0.000857207	0.00516957
ARL6IP1	-0.657025	0.00200564	0.0100419
FOXRED1	-0.65744	0.000146582	0.00128784
CCDC34	-0.657722	0.0101358	0.0359814
ZNF101	-0.657921	0.00202636	0.0101237
TEFM	-0.659872	0.000218286	0.00177349
ZBTB2	-0.659888	1.08162e-10	1.99406e-08
C1orf131	-0.659931	0.000667788	0.00427619
USP7	-0.659985	8.12779e-06	0.000141131
BAZ1A	-0.660176	0.00092844	0.00550612
RBM15	-0.660707	0.00112545	0.00637327
PTDSS1	-0.660761	8.36888e-07	2.48949e-05
NAA16	-0.66155	0.00219019	0.0107692
NEU3	-0.661784	1.74221e-06	4.18126e-05
DUSP7	-0.662243	0.0144115	0.0471739
EEF1E1	-0.66311	7.22664e-07	2.22966e-05
PDRG1	-0.663916	1.88984e-05	0.000263501
SMAD5	-0.664071	0.000170128	0.00144214
SFR1	-0.664163	0.000574775	0.00379745
RASA2	-0.664581	0.000244604	0.00194291
YOD1	-0.664889	0.00151978	0.00809954
LEO1	-0.665391	4.82711e-05	0.000544177
SSBP1	-0.665665	0.000118991	0.00109414
NTAQ1	-0.665791	0.000395482	0.00285163
HAUS4	-0.666468	0.00906232	0.0328996
TELO2	-0.666586	0.00362757	0.0161174
SLC38A1	-0.667049	0.00195162	0.00982917
SSR3	-0.667373	0.00302517	0.0139774
NAA25	-0.667607	3.1078e-05	0.000384816
SNRPB	-0.667731	0.00217942	0.0107339
ATP6V0A2	-0.667816	7.42955e-08	3.87323e-06
HSPA8	-0.667844	0.000285812	0.00220343
TUBB4B	-0.667894	0.0123453	0.0420236
TCHP	-0.667994	5.36544e-06	0.000101807
GABPB1	-0.668043	0.000595296	0.00389893
NUP93	-0.668948	2.62083e-06	5.79906e-05
PSMD2	-0.669116	0.00269966	0.0127657
ALKBH8	-0.669632	0.000581498	0.00382871
KBTBD6	-0.670348	0.000131001	0.00117704
UPP1	-0.670416	0.00229084	0.0111649
TMX3	-0.670593	0.00443373	0.0188576
LRRC20	-0.670629	0.00553704	0.0225667
AP4B1	-0.670996	0.000246513	0.00195496
ZNF107	-0.671039	0.00190557	0.00965585
RLIM	-0.671585	0.00014661	0.00128784
FCF1	-0.671901	0.000218728	0.00177611
RABEPK	-0.672001	6.43653e-05	0.000682647
ZW10	-0.672281	0.000204511	0.00168355
RFT1	-0.672921	1.36314e-09	1.64159e-07
RTN4IP1	-0.672944	0.000421881	0.00299696
ZNF200	-0.673298	0.000468961	0.00325569
RDX	-0.67344	2.018e-06	4.70832e-05
KCTD3	-0.674012	0.000461113	0.00321316
LINS1	-0.674544	0.000980762	0.00573892
PITPNB	-0.674978	1.68366e-06	4.07489e-05
LIN54	-0.675464	0.00128848	0.00712879
FBXO4	-0.67621	0.00124299	0.0069208
GPCPD1	-0.676482	1.48938e-06	3.74425e-05
SHLD3	-0.676486	0.00670564	0.0261041
ABHD5	-0.676534	0.000427261	0.0030224
BDP1	-0.677735	0.0054581	0.0223242
NAE1	-0.677951	6.29875e-05	0.000670165
ZNF800	-0.678405	3.06689e-06	6.49373e-05
PGAM5	-0.678741	0.000255333	0.00200467
SLK	-0.678966	0.00114315	0.00644907
GEMIN4	-0.679258	0.000619663	0.00402498
RBM3	-0.679301	0.0018467	0.00942476
TARDBP	-0.679654	5.79392e-05	0.000628327
AIFM2	-0.679656	0.000110872	0.00103999
TGDS	-0.679698	7.85856e-06	0.000137583
NOP9	-0.679709	2.10147e-07	8.4132e-06
TMEM208	-0.681269	2.04736e-08	1.47697e-06
TSEN2	-0.681824	2.8596e-06	6.15309e-05
NOM1	-0.68211	4.34362e-05	0.000501412
LPP	-0.682282	0.0020073	0.0100419
TMEM201	-0.682475	0.00506552	0.0210179
PUS1	-0.682632	0.00568175	0.022973
GAN	-0.682691	4.33687e-05	0.000501257
LCLAT1	-0.683183	0.00184058	0.00940312
TMEM170A	-0.683285	1.12226e-05	0.000178095
MRPL3	-0.683508	0.000136188	0.00121414
SNRNP48	-0.6838	0.00051546	0.0034877
ETF1	-0.684708	3.86722e-06	7.84636e-05
BUB3	-0.685552	5.33739e-06	0.000101404
DDX10	-0.685677	3.31441e-05	0.000407694
ING3	-0.685873	0.000299261	0.00229173
WDR5	-0.686145	2.02991e-06	4.72158e-05
SERBP1	-0.686585	1.74171e-05	0.000248431
POLR2B	-0.687051	0.000200794	0.00165695
SAFB	-0.687383	5.07736e-05	0.0005633
ARL13B	-0.687549	7.99404e-05	0.000810971
PLIN2	-0.687749	0.00183698	0.00939438
BCS1L	-0.688105	4.33973e-07	1.49313e-05
ZC3H12C	-0.688357	0.000307431	0.00234467
SRSF10	-0.688441	6.29128e-07	2.02474e-05
NUP153	-0.689154	4.09e-05	0.000478652
WAPL	-0.689962	0.000112694	0.0010531
APTX	-0.690179	2.61719e-08	1.80448e-06
FASTKD1	-0.690873	1.58912e-05	0.000233796
C9orf72	-0.691657	0.00292923	0.013593
TPD52	-0.691735	1.28198e-05	0.000195608
SLC19A2	-0.693021	7.7602e-05	0.00079101
ATR	-0.694072	2.69834e-05	0.000345873
RNF168	-0.694075	0.00153415	0.00815052
MIS12	-0.694131	0.00102752	0.00595648
SLC7A6	-0.694657	0.00361474	0.0160699
SMG1	-0.694892	0.00499397	0.0207903
KRR1	-0.695185	0.000745572	0.00465064
ARF6	-0.695533	4.07262e-07	1.41434e-05
GTF2A1	-0.69572	0.000822285	0.00500795
RPL7L1	-0.69595	8.24996e-07	2.46393e-05
GSTO1	-0.696128	5.99752e-06	0.000110706
MGA	-0.696442	0.000328465	0.00246605
RBMX	-0.696671	0.000386753	0.00280266
CCP110	-0.697425	0.00718501	0.0274971
ZSCAN12	-0.697613	0.000809587	0.00495271
NMD3	-0.697743	2.02242e-05	0.000277581
WDR61	-0.698171	5.09714e-08	2.92752e-06
DGKD	-0.698354	0.00703351	0.0271189
PMS1	-0.698986	0.00325009	0.0147833
PHF6	-0.699207	0.000542794	0.00363314
IPO8	-0.699591	1.65904e-05	0.000241231
KPNB1	-0.699687	1.51007e-05	0.000223522
CNBP	-0.700595	2.4012e-05	0.00031635
ANKHD1	-0.700676	0.000239959	0.00191314
ETFA	-0.701212	2.09667e-05	0.000284504
CTNNAL1	-0.701407	0.000408046	0.00291548
MTPAP	-0.701562	1.50733e-05	0.000223522
WEE1	-0.701575	2.62392e-07	1.02306e-05
TFDP1	-0.701666	6.39532e-05	0.000678758
MTFP1	-0.702267	0.00486582	0.0203476
SNRPE	-0.702313	0.000196224	0.00162519
SLC25A5	-0.702424	8.98915e-07	2.62178e-05
FUBP1	-0.702634	6.99114e-06	0.000125178
HSPH1	-0.702679	3.81475e-07	1.34671e-05
C1orf109	-0.702829	1.78977e-10	3.10775e-08
RSL1D1	-0.703906	1.08298e-06	2.98931e-05
DDX1	-0.703974	2.22389e-05	0.000297308
MFSD14B	-0.704377	1.7818e-10	3.10775e-08
ERBIN	-0.704778	0.000638262	0.00412389
PIGA	-0.704984	0.00111174	0.00631482
FDXACB1	-0.705088	0.000127535	0.00115213
ZNF202	-0.706853	3.79801e-08	2.37304e-06
LLPH	-0.707675	4.03547e-09	3.96458e-07
TSN	-0.707852	1.97637e-06	4.62587e-05
GCFC2	-0.70811	0.00339699	0.0153116
PPWD1	-0.708155	0.000692689	0.00439606
SCML1	-0.708385	0.00113303	0.00640167
TMEM64	-0.708899	2.74116e-07	1.05499e-05
MTMR2	-0.709851	8.96202e-05	0.000881297
TAF1D	-0.709881	0.00150723	0.00805851
EIF3J	-0.710818	3.84838e-08	2.3945e-06
NDUFAF6	-0.710823	5.72526e-07	1.87902e-05
EIF3A	-0.710923	2.8574e-05	0.000363003
DRG1	-0.711105	1.22346e-11	4.26165e-09
NOP14	-0.711366	2.82436e-06	6.09482e-05
ATL3	-0.711621	0.0026532	0.0126019
CKAP5	-0.711624	0.000106	0.00100821
PANK3	-0.713552	0.000534415	0.00358832
H2AZ2	-0.714088	2.33553e-05	0.000309737
PDIK1L	-0.714718	6.14053e-05	0.000658462
TMEM126A	-0.715308	9.16246e-05	0.000898378
COPS3	-0.715491	1.23421e-06	3.30888e-05
PHF10	-0.715586	0.000535368	0.00359149
BUD13	-0.715645	9.05571e-06	0.000152579
CRLF3	-0.7159	0.000343437	0.00255405
KLHL15	-0.716126	4.00243e-06	8.06589e-05
WDR17	-0.716335	0.00575619	0.0232254
RBMXL1	-0.716831	0.000487111	0.00334716
HAUS1	-0.71688	2.44357e-05	0.000319806
CHD7	-0.717316	0.00141533	0.00766043
PSMC3	-0.717428	4.72097e-05	0.000534482
SKP2	-0.717748	0.000418278	0.00297861
BLMH	-0.718378	0.000117914	0.00108723
POLR3F	-0.718942	7.53263e-07	2.29093e-05
POLR1C	-0.719115	1.73621e-07	7.38657e-06
THAP12	-0.71926	1.09231e-05	0.000174641
FAM136A	-0.719482	1.98411e-07	8.16216e-06
ZNF180	-0.719489	0.000117959	0.00108723
DBF4B	-0.72081	0.00196818	0.00989922
ZNF331	-0.720826	0.00730858	0.0278985
RBM28	-0.721455	1.06568e-05	0.000171116
MRPL1	-0.721456	0.00276075	0.013008
GEMIN6	-0.721538	8.57602e-05	0.000853715
ZBTB10	-0.721552	0.00629407	0.0248589
NT5C3A	-0.722044	1.44983e-06	3.67648e-05
SLC25A32	-0.723321	0.000172235	0.00145639
ZC3H15	-0.723576	1.19348e-06	3.24632e-05
GNL3	-0.724643	1.74727e-05	0.000248969
CCNJ	-0.724763	1.25461e-05	0.000192946
COIL	-0.724852	0.000149911	0.00130914
RCL1	-0.72544	1.78148e-05	0.000252902
MCUB	-0.726542	0.00628403	0.0248589
HNRNPU	-0.726671	4.87083e-06	9.45318e-05
STAMBPL1	-0.726788	0.0128898	0.0434304
PPP1R15B	-0.727406	2.97187e-06	6.33079e-05
ZNF485	-0.727452	0.0028729	0.0133857
DUS2	-0.727488	2.52629e-07	9.90158e-06
UBIAD1	-0.728049	4.87479e-09	4.57832e-07
PMAIP1	-0.728555	0.00311281	0.0142694
LRRC8B	-0.729024	0.00382638	0.0168205
COA6	-0.729632	3.69924e-06	7.62994e-05
RAD51D	-0.730532	2.61823e-08	1.80448e-06
AK6	-0.730599	6.15365e-06	0.000112751
ALMS1	-0.730827	0.000323729	0.00243626
ZNF844	-0.731697	0.00207931	0.0103398
TMEM126B	-0.732022	2.11016e-05	0.000285387
CHUK	-0.732092	4.32931e-06	8.60846e-05
ADTRP	-0.73244	0.00451632	0.0191434
METTL1	-0.732513	0.00426223	0.0183054
GK5	-0.733622	0.000114563	0.00106564
CBWD6	-0.73439	0.00808293	0.0300956
PSMA2	-0.734508	1.31004e-06	3.43751e-05
MRPS28	-0.734765	1.74183e-05	0.000248431
C3orf14	-0.734984	4.99273e-05	0.000557639
ADAT2	-0.735079	0.000720216	0.0045227
ZNF761	-0.73548	0.00172186	0.0089466
UCK2	-0.735617	1.49818e-05	0.00022239
ACVR2B	-0.736085	0.00101902	0.00592331
ZNF649	-0.736199	5.4261e-05	0.000594761
MED30	-0.736365	0.00140646	0.007629
GNPNAT1	-0.736441	6.75461e-05	0.000710328
FAM210A	-0.736582	0.000677353	0.0043134
GPATCH11	-0.736836	0.000525304	0.00353724
CDK5RAP2	-0.736872	1.79465e-05	0.000254264
ERLIN1	-0.736938	3.04792e-05	0.000380238
MRM3	-0.737563	0.000279862	0.00216425
BAZ1B	-0.737848	2.78541e-06	6.03693e-05
XRCC6	-0.73801	0.000106255	0.00100829
SNRNP25	-0.738133	0.000121219	0.00111053
ZUP1	-0.73824	1.02913e-05	0.000167043
SHISA2	-0.739013	0.0106486	0.0374066
ARID3B	-0.739334	0.00655011	0.0256188
DYNLL2	-0.739604	6.54223e-08	3.46437e-06
FUS	-0.739836	0.000124791	0.0011349
LPGAT1	-0.739959	2.77313e-05	0.000353942
ADCY3	-0.74008	0.00149637	0.00801481
CCDC134	-0.740306	5.74302e-07	1.88071e-05
DHX15	-0.740387	1.27075e-06	3.36236e-05
NRAS	-0.740578	0.000528841	0.00355409
ENOSF1	-0.741074	0.00214106	0.0105764
POLR1F	-0.741153	6.31782e-06	0.000115194
NOL10	-0.74116	7.15166e-05	0.000740609
KANSL2	-0.74169	9.82973e-12	3.76378e-09
RANBP2	-0.742796	0.00119326	0.00669131
FH	-0.742843	4.86798e-06	9.45318e-05
ZNF44	-0.743549	7.02966e-05	0.000733058
C18orf25	-0.746476	5.42628e-06	0.000102831
ZCCHC8	-0.746866	5.6641e-05	0.000616353
GRPEL1	-0.746936	4.15407e-07	1.43263e-05
SNAPC5	-0.746982	0.00219145	0.01077
NIFK	-0.747276	2.89271e-05	0.000365766
CCDC77	-0.747704	0.000928841	0.00550631
WDR36	-0.748397	0.000108099	0.00102038
QSOX2	-0.748431	0.000173545	0.00146415
CCDC47	-0.748893	1.89667e-05	0.00026396
CBL	-0.749017	0.000922737	0.00548318
CLP1	-0.749105	1.56449e-07	6.89161e-06
TANGO6	-0.750793	6.34463e-06	0.000115542
SLC5A6	-0.750923	4.82611e-05	0.000544177
MLH1	-0.752032	5.05753e-10	7.26193e-08
DHX9	-0.752153	0.000220703	0.00178632
CNOT9	-0.75348	3.95084e-05	0.00046565
PLD6	-0.753674	0.0125155	0.0424952
TM4SF1	-0.754225	0.00047029	0.0032618
IMPA1	-0.754566	1.16467e-06	3.1822e-05
RUVBL1	-0.754783	7.58513e-05	0.000776878
ABCF2-H2BE1	-0.756388	0.000740173	0.00462469
CORO1C	-0.756516	0.00141472	0.00765991
NUDT21	-0.756969	3.13822e-05	0.000387864
FAR1	-0.757356	4.4789e-05	0.000512517
TMEM154	-0.757674	0.0140984	0.0464031
KIF21A	-0.757681	5.07518e-05	0.0005633
LARS1	-0.757923	3.00125e-06	6.38428e-05
ACTR6	-0.758026	4.59054e-05	0.000522489
CRKL	-0.758151	7.70177e-06	0.000135147
ZNF141	-0.7582	0.00397162	0.0173213
MRPS25	-0.758755	2.12948e-09	2.40906e-07
ZNF280C	-0.758787	7.23996e-05	0.000747583
ABRACL	-0.759475	0.00121475	0.00678634
ANAPC1	-0.759749	3.95965e-06	8.01213e-05
ZNF507	-0.760018	0.000797527	0.00489698
ATP2B1	-0.760323	0.00190945	0.00966899
RAD1	-0.76071	9.09858e-12	3.5755e-09
HNRNPA2B1	-0.760715	0.00168325	0.00877653
NRIP3	-0.761634	2.76711e-05	0.000353475
SYNCRIP	-0.762468	1.51128e-05	0.000223522
GMPS	-0.762826	2.01376e-05	0.000276902
ZNF619	-0.763269	0.00107794	0.00617448
DCTPP1	-0.763421	0.000200835	0.00165695
TPRKB	-0.763505	2.9103e-06	6.22629e-05
PRMT3	-0.763726	1.73724e-05	0.00024825
FANCC	-0.763726	0.000342317	0.00254826
NLE1	-0.76434	3.8025e-06	7.76782e-05
PKD1L1	-0.764503	0.000106464	0.00100877
GNL2	-0.764804	5.06017e-05	0.000562648
FKBP4	-0.765138	0.000619963	0.00402518
INCENP	-0.765471	0.0068974	0.0267252
RPL7	-0.765752	0.000157013	0.00135923
SNX5	-0.765873	8.28449e-06	0.000142855
CHD1	-0.76679	0.000223004	0.00180201
ZNF22	-0.767139	0.00152101	0.00810321
DOCK4	-0.767238	1.1648e-05	0.000182136
CALM2	-0.7675	0.000161346	0.00138789
ZNF780A	-0.768238	0.012011	0.0412324
UTP4	-0.768533	9.1522e-07	2.64352e-05
XYLB	-0.769057	9.47258e-08	4.62268e-06
ZNF620	-0.769556	0.00598455	0.0239469
YRDC	-0.77047	0.00442424	0.0188279
CENPS	-0.770959	0.00303375	0.014004
LMNB2	-0.771094	0.00634818	0.0250125
FN3KRP	-0.771364	4.66444e-10	6.82882e-08
WDR35	-0.772206	0.00110314	0.00627791
CCT4	-0.77222	5.42852e-08	3.03611e-06
SSRP1	-0.77241	0.00123625	0.00689295
KTN1	-0.77255	0.00116985	0.0065699
TMA16	-0.773461	2.29535e-05	0.000305767
SF3A3	-0.773888	3.26363e-06	6.87388e-05
USP31	-0.773956	2.346e-05	0.000310851
CBX3	-0.774029	1.65003e-06	4.01302e-05
PSMA5	-0.776096	3.18334e-07	1.18483e-05
CBFB	-0.776158	1.81256e-05	0.000256316
FUCA2	-0.776608	5.62028e-15	7.62978e-12
GAR1	-0.777438	3.90939e-05	0.000461859
HOMER2	-0.777873	0.00276573	0.0130245
CCDC59	-0.779814	0.000425648	0.00301242
MRPL35	-0.779893	3.55625e-05	0.00042758
ATL2	-0.781066	0.000176642	0.00148441
BZW1	-0.782605	4.58117e-05	0.00052182
CHORDC1	-0.783253	0.000148427	0.00130151
SPCS3	-0.783698	0.000108909	0.00102544
ZNF486	-0.784156	0.00132573	0.00728641
NUP88	-0.785198	4.43451e-06	8.77134e-05
NGDN	-0.785259	3.44143e-06	7.1976e-05
LIAS	-0.785625	6.69572e-06	0.000120466
SLC25A19	-0.787716	0.00418224	0.0180137
RNASEH2B	-0.787936	6.04776e-05	0.000650657
ZNF267	-0.788484	0.000797225	0.00489698
CCT6A	-0.788781	1.72766e-08	1.27337e-06
CCNE1	-0.790047	0.00111642	0.00633859
PPIH	-0.791381	4.86264e-06	9.45318e-05
SNRPG	-0.791707	1.94693e-06	4.5713e-05
FBXO48	-0.792304	0.000252539	0.00198691
OTUD6B	-0.792309	0.000386825	0.00280266
ORC2	-0.79284	2.26759e-06	5.12283e-05
PHLPP2	-0.792967	2.119e-05	0.000285978
NAA20	-0.793197	1.43548e-06	3.6518e-05
HYLS1	-0.79412	8.28777e-07	2.47029e-05
NEK4	-0.795162	1.36907e-06	3.5432e-05
FARSB	-0.795404	0.000446758	0.00313213
C4orf46	-0.795948	3.68541e-05	0.000440273
POLE3	-0.796515	5.39318e-07	1.77784e-05
ZNF772	-0.796634	0.00907137	0.0329193
RPA1	-0.79822	1.64079e-06	3.99705e-05
DDX55	-0.799048	2.17864e-16	5.42227e-13
MREG	-0.799541	3.7586e-06	7.70971e-05
WDR12	-0.801052	8.98687e-06	0.000151639
GFOD1	-0.801388	0.00850536	0.0313142
HK2	-0.801603	3.3716e-05	0.000412352
XPO1	-0.802051	0.000118163	0.00108723
EPB41L3	-0.802266	0.00366034	0.0162294
PA2G4	-0.802311	7.18406e-05	0.000742933
PSMC1	-0.802415	0.000113317	0.00105761
NSUN2	-0.802905	2.40702e-07	9.49635e-06
WDR43	-0.803251	1.45011e-06	3.67648e-05
ILKAP	-0.804127	1.3503e-06	3.5129e-05
SLF2	-0.804804	0.000126447	0.00114577
ZNF85	-0.805093	1.7691e-06	4.2134e-05
MRPL33	-0.805441	7.12875e-10	9.59041e-08
EIF1AX	-0.805475	1.8892e-06	4.44974e-05
HNRNPH1	-0.805672	8.01305e-06	0.000139952
POLD1	-0.806613	0.0045723	0.0193149
EIF4E	-0.807008	6.30018e-06	0.000115154
VBP1	-0.807785	4.76343e-06	9.29833e-05
UBASH3B	-0.809136	0.00185899	0.00947125
XDH	-0.810536	0.00557533	0.0226607
CHEK1	-0.811091	0.000105343	0.00100388
RRS1	-0.81119	0.00254105	0.0121659
NUP58	-0.811445	7.93371e-07	2.39342e-05
CD109	-0.811768	0.0103542	0.0366048
RRP12	-0.812503	0.000302995	0.00231504
IDH3A	-0.813188	1.06468e-08	8.88201e-07
RBBP8	-0.813542	0.00225504	0.0110191
HSPA9	-0.813774	1.90976e-05	0.000265287
MTERF3	-0.814151	2.72549e-06	5.95354e-05
PPTC7	-0.814586	1.65209e-07	7.13024e-06
PDCD11	-0.815555	1.92938e-05	0.000267515
WDR89	-0.815679	0.000400472	0.00287512
GPSM2	-0.816628	0.00111916	0.00634732
LSM5	-0.816847	3.76666e-09	3.775e-07
DIS3L	-0.820512	1.4231e-08	1.11848e-06
CEP85	-0.820748	9.39662e-05	0.000914135
SMIM13	-0.821412	1.69058e-06	4.08502e-05
LAS1L	-0.822264	6.66365e-13	4.14618e-10
NCAPD2	-0.822938	0.000371632	0.00272165
PGM2	-0.823505	2.09801e-07	8.4132e-06
ST3GAL1	-0.825098	4.77065e-11	1.11472e-08
SOWAHC	-0.825234	2.36588e-10	3.90917e-08
RPS27A	-0.826218	1.94979e-05	0.000269594
LIN52	-0.826273	4.01691e-09	3.96458e-07
RANBP1	-0.826494	0.000300642	0.00229994
TAF5	-0.827207	0.000163165	0.00139851
MDN1	-0.828405	0.000350912	0.00259286
HNRNPAB	-0.828538	2.3484e-05	0.000310892
WDR4	-0.828617	0.000401491	0.00288081
UTP6	-0.829303	1.6423e-08	1.23238e-06
B3GNT5	-0.829333	0.00255399	0.0122044
CTSV	-0.829392	0.00531459	0.0218545
DHX36	-0.829445	0.00013925	0.00123628
FASTKD3	-0.830337	7.08456e-07	2.20864e-05
AKAP1	-0.830606	5.25935e-08	2.99763e-06
NDUFAF4	-0.831057	1.90947e-08	1.39775e-06
POU2F1	-0.832374	2.08257e-05	0.000283292
KLHL8	-0.83292	4.39861e-05	0.000506434
PAQR3	-0.83386	1.04488e-07	5.001e-06
AATF	-0.834464	1.47489e-06	3.72244e-05
MTREX	-0.835035	0.000288682	0.00221983
GNRH1	-0.83514	0.00875899	0.0320852
PSMD12	-0.835745	2.12734e-06	4.90241e-05
CHD1L	-0.836151	7.19934e-06	0.000128444
UBA2	-0.836259	3.66697e-08	2.32029e-06
IPO7	-0.83729	7.87812e-05	0.000800843
ZNF808	-0.837976	0.00298501	0.0138089
ZNF670	-0.838393	5.97048e-07	1.94242e-05
GTF2H2	-0.838422	0.00396551	0.0173076
PSMC6	-0.838643	3.50888e-05	0.000422732
DHODH	-0.839125	1.29694e-06	3.41574e-05
SUV39H1	-0.839369	0.000584974	0.0038458
BYSL	-0.841309	8.89596e-07	2.61503e-05
RBM12B	-0.841551	1.19528e-05	0.000185735
DBR1	-0.841854	1.92286e-06	4.52189e-05
DUT	-0.841949	0.00151675	0.00808628
GNB4	-0.841996	0.000889948	0.00533075
PINX1	-0.843298	6.83271e-05	0.000715518
STK26	-0.843429	0.000487876	0.00334963
FAM98B	-0.843761	0.00241755	0.0116719
TUBGCP3	-0.844669	1.52931e-05	0.000225663
UNG	-0.845059	2.70687e-07	1.04719e-05
CEP44	-0.845069	0.000225969	0.00181908
HENMT1	-0.846169	0.00186923	0.00950076
CCT2	-0.846328	3.10572e-08	2.04125e-06
KLHL23	-0.846479	0.000323103	0.00243424
ZNF121	-0.847624	2.52759e-05	0.000328785
PPP2R3C	-0.847765	2.08363e-05	0.000283292
HNRNPF	-0.848686	1.27217e-06	3.36236e-05
SAAL1	-0.849213	1.05179e-05	0.000169982
EIF2B3	-0.849228	4.37525e-06	8.67671e-05
MTX3	-0.849597	7.24404e-05	0.000747583
NOL8	-0.849713	3.871e-07	1.35694e-05
TEX10	-0.851942	9.12848e-07	2.64178e-05
ORC5	-0.852247	3.98393e-11	1.00318e-08
AHCTF1	-0.852505	8.9576e-07	2.62178e-05
GXYLT1	-0.852891	0.001482	0.00795819
NUP54	-0.853502	5.91903e-05	0.000638187
SACS	-0.853595	0.00361604	0.0160709
LSMEM1	-0.853705	0.00447607	0.0189998
PTGES3	-0.853839	2.63428e-08	1.80448e-06
ZNF215	-0.853907	9.21763e-05	0.00090122
TCOF1	-0.854604	0.000770429	0.0047718
GTPBP4	-0.854797	5.82086e-06	0.000108654
CCNT1	-0.855114	4.50834e-08	2.67303e-06
LRRC34	-0.855778	0.000329724	0.00246929
C9orf64	-0.856014	4.24782e-05	0.000492872
AFG3L2	-0.856129	2.49261e-10	4.04589e-08
DHX33	-0.856459	5.03446e-07	1.68187e-05
CDCA7L	-0.85664	0.00126283	0.00701818
SNAPC1	-0.856742	0.00025009	0.00197702
ZNF625	-0.857492	0.00174782	0.00906572
IMMP1L	-0.85842	0.000145078	0.00127815
RASSF8	-0.858851	7.70991e-07	2.34008e-05
C2orf69	-0.859783	1.16304e-06	3.1822e-05
NUP50	-0.860089	2.73353e-06	5.95354e-05
FAR2	-0.862505	0.00222358	0.0108937
COMMD3-BMI1	-0.863399	0.00229765	0.011193
ERI2	-0.863887	2.64916e-06	5.85205e-05
FABP5	-0.865577	0.000583584	0.00383906
OGFRL1	-0.86592	4.74145e-05	0.000535988
GYPE	-0.866142	0.000298102	0.0022852
NOL11	-0.866936	4.96053e-06	9.58288e-05
GPRIN1	-0.866968	0.000577802	0.00381447
KLHL11	-0.867232	2.85557e-06	6.15309e-05
GCNT4	-0.867744	0.000893234	0.00534616
COA7	-0.867828	3.67941e-07	1.31133e-05
LARP4	-0.868465	5.96936e-05	0.000643149
SFXN4	-0.86871	3.11663e-08	2.04125e-06
ZDHHC6	-0.868843	5.01053e-06	9.6049e-05
YEATS4	-0.869071	2.17243e-05	0.000291735
HPRT1	-0.869286	0.00105139	0.00605948
POLR2D	-0.871114	7.50618e-08	3.87854e-06
NARS2	-0.871161	8.84167e-05	0.00087381
MTIF2	-0.871996	8.20258e-06	0.000141922
ARNTL2	-0.872311	0.000563457	0.00374126
EXOSC3	-0.872523	1.58656e-06	3.89672e-05
CWF19L1	-0.872526	9.28435e-08	4.57568e-06
PHF5A	-0.874313	8.90958e-06	0.000150676
BCCIP	-0.875311	0.000156728	0.00135778
TMEM200B	-0.875536	0.001304	0.00719609
ZNF525	-0.875656	0.000123327	0.0011257
GSTCD	-0.875779	4.32424e-08	2.58562e-06
TTI1	-0.875789	3.37906e-07	1.23072e-05
NOC3L	-0.875895	6.7991e-07	2.15074e-05
DDX46	-0.876911	8.3066e-05	0.000836993
GTF2H3	-0.878064	1.12401e-08	9.12217e-07
MAGOH	-0.879408	4.86203e-08	2.82508e-06
PARP2	-0.880304	4.83695e-05	0.000544722
IQCC	-0.880438	0.00032003	0.00241933
LRPPRC	-0.88215	6.01951e-06	0.000110744
TIMM21	-0.883554	0.000424207	0.00300875
LRP8	-0.883627	0.00138001	0.00751555
ALG10B	-0.884165	0.000605148	0.00395315
CHST3	-0.884646	6.49484e-07	2.07238e-05
RRP9	-0.886019	0.000249701	0.0019755
NUDT15	-0.886099	6.42507e-06	0.000116439
ALYREF	-0.887331	0.01196	0.041095
RCC1	-0.887609	9.03993e-05	0.000886946
ZNF501	-0.887765	0.00340815	0.0153434
GGH	-0.887933	6.30538e-05	0.000670165
LSM11	-0.888694	0.0012883	0.00712879
PPAN	-0.889321	0.000408842	0.00291837
AGBL3	-0.891686	0.00716594	0.0274452
TOE1	-0.892009	3.00794e-05	0.000376902
NHLRC2	-0.892621	2.96437e-06	6.32385e-05
ECT2	-0.892936	0.000318145	0.00241066
EMG1	-0.893072	1.06225e-08	8.88201e-07
API5	-0.893089	6.52296e-08	3.46437e-06
DTYMK	-0.893948	0.000438906	0.00308868
NAA50	-0.894469	5.96785e-09	5.36854e-07
ERI1	-0.894631	4.9983e-05	0.000557845
TLCD4-RWDD3	-0.895105	0.00807531	0.0300956
MTHFD1	-0.895282	2.43029e-05	0.000318906
POLA2	-0.895379	9.99316e-05	0.00096276
KYNU	-0.896754	0.000160103	0.00137958
HMGCR	-0.897519	0.000328909	0.0024669
RAD21	-0.897727	5.50499e-05	0.000602242
ZNF765	-0.89791	5.2952e-07	1.74941e-05
IPO5	-0.897958	8.77276e-06	0.000149037
AGO2	-0.898351	2.79035e-06	6.03889e-05
HEATR1	-0.898817	8.48615e-06	0.000145435
CBWD3	-0.898947	0.00155099	0.00820147
HEATR3	-0.899395	3.58348e-07	1.28651e-05
RABGGTB	-0.899651	1.28299e-05	0.000195608
SLC43A3	-0.90066	0.00707586	0.027247
G3BP1	-0.900714	1.00547e-06	2.84902e-05
FASTKD2	-0.901054	1.63854e-08	1.23238e-06
MAK16	-0.902269	9.03702e-07	2.62548e-05
RAD54B	-0.902665	0.000460219	0.00320992
PI4K2B	-0.902882	1.12657e-07	5.25719e-06
POLR1E	-0.902908	5.66763e-05	0.000616353
MPHOSPH9	-0.903819	1.11085e-05	0.000177037
PARP1	-0.903956	4.07876e-05	0.000478086
INTS2	-0.90488	5.05838e-05	0.000562648
NAT10	-0.905292	3.9871e-07	1.38786e-05
MEF2C	-0.905499	0.00116324	0.0065426
RPS10-NUDT3	-0.906043	0.0151731	0.0491389
MSH5	-0.90641	0.000173129	0.00146229
RAN	-0.907867	3.32821e-06	7.00002e-05
HSPA4L	-0.908332	0.00477941	0.0200199
DDX39A	-0.909062	8.2114e-06	0.000141922
IPO11	-0.909101	2.60158e-08	1.80448e-06
NLRP3	-0.909301	0.00415307	0.0179139
ZNF468	-0.909623	0.000139511	0.00123786
G2E3	-0.909861	0.000106973	0.00101167
PNP	-0.909966	3.85648e-05	0.000457055
PRPS2	-0.910072	0.000155762	0.00135154
POLG2	-0.91055	5.52761e-06	0.000104188
PHF19	-0.912038	0.00849098	0.031269
THOC1	-0.913683	2.50886e-05	0.000326633
PM20D2	-0.91372	1.02264e-05	0.000166171
RIOK1	-0.915438	1.74441e-06	4.18126e-05
DIAPH3	-0.916078	4.88594e-06	9.45844e-05
USP37	-0.916249	0.00016561	0.0014156
DNTTIP2	-0.91633	3.78526e-06	7.74319e-05
NOG	-0.9209	0.00565844	0.022899
PTTG1	-0.920969	0.0080541	0.0300543
NUCKS1	-0.921269	1.72716e-05	0.000247283
TFB2M	-0.921692	6.0719e-07	1.96916e-05
ACTL6A	-0.921902	1.96103e-07	8.08952e-06
PSMD14	-0.921925	1.66697e-06	4.04762e-05
FBXO30	-0.922121	3.06335e-05	0.000381527
GRPEL2	-0.92602	2.13618e-05	0.000287383
MARS2	-0.926048	1.00736e-06	2.84902e-05
SYBU	-0.926153	0.0108663	0.0379928
TWNK	-0.926735	1.31668e-11	4.46862e-09
FANCL	-0.928415	0.000528516	0.0035535
TTC27	-0.929938	3.03409e-06	6.43581e-05
ZNF700	-0.930592	1.2143e-05	0.000187714
SLC25A15	-0.931444	1.54374e-10	2.74437e-08
HNRNPM	-0.931444	2.30368e-05	0.000306603
MRPL15	-0.9322	2.68329e-09	2.84181e-07
RPIA	-0.932681	1.20544e-07	5.53873e-06
IQCB1	-0.933792	5.20501e-06	9.92675e-05
TBC1D31	-0.934062	9.7344e-05	0.000940257
SNRPA1	-0.934609	9.78394e-06	0.000161084
WDR75	-0.934984	2.99956e-07	1.14559e-05
HSPA14	-0.935232	2.57559e-14	2.53925e-11
DNMT1	-0.935586	0.000518225	0.00350165
ANKRD36	-0.935825	0.00693377	0.0268286
CSTF2	-0.93649	7.3549e-07	2.25684e-05
ATAD3B	-0.937154	0.000921477	0.00547873
DDX6	-0.937469	6.46774e-05	0.000684498
ITGB3BP	-0.937716	0.00235871	0.0114396
U2SURP	-0.938118	4.98983e-06	9.6049e-05
MYO19	-0.939034	0.00116607	0.00655113
DCLRE1B	-0.943593	7.1018e-07	2.2094e-05
ABCE1	-0.944235	7.73696e-05	0.00078972
MCMBP	-0.945863	1.26059e-06	3.34359e-05
UTP14A	-0.946332	1.67633e-08	1.2454e-06
MIOS	-0.948373	2.97237e-05	0.000373623
PAICS	-0.949848	0.000327719	0.00246169
SRSF7	-0.949987	1.06621e-06	2.95944e-05
GPN3	-0.950807	3.44567e-09	3.52425e-07
CKAP2	-0.951175	0.000833164	0.00505758
PUM3	-0.951202	1.39875e-06	3.58894e-05
DEK	-0.951655	3.44188e-05	0.000417188
SMCHD1	-0.951959	4.05572e-05	0.000475758
TIMM10	-0.952004	5.64854e-06	0.00010575
ABCB10	-0.95264	4.28644e-09	4.12964e-07
NBPF19	-0.953631	0.0124293	0.0422698
RBM12	-0.956865	7.39079e-09	6.53058e-07
AS3MT	-0.95868	0.00508694	0.0210833
GPAM	-0.961431	2.93877e-08	1.96792e-06
RNF138	-0.962469	5.23276e-07	1.73261e-05
FOXM1	-0.96296	0.011189	0.0389054
SPIN4	-0.964949	0.000132295	0.0011851
ZNF100	-0.965078	3.34698e-08	2.15433e-06
PRPF4	-0.965559	1.44616e-10	2.60187e-08
HROB	-0.966456	0.00306429	0.0141163
CETN3	-0.967462	1.31168e-06	3.43751e-05
NUP85	-0.968593	2.7728e-06	6.01835e-05
CENPL	-0.969253	2.98096e-05	0.000374081
MLKL	-0.970095	1.11529e-05	0.000177177
AGPAT5	-0.970146	9.34997e-06	0.000156528
NPM1	-0.970321	0.000116872	0.00108114
MPHOSPH6	-0.971372	2.61346e-05	0.000337603
RFESD	-0.971705	0.00531545	0.0218545
HNRNPD	-0.971773	5.40731e-05	0.000593294
NUDCD1	-0.972132	2.0363e-07	8.26306e-06
DGKE	-0.97247	1.48355e-06	3.73591e-05
EBNA1BP2	-0.974602	1.54195e-08	1.18082e-06
REXO5	-0.975485	9.68744e-05	0.000936327
TTC26	-0.977173	1.28116e-05	0.000195608
GLMN	-0.977797	1.93629e-05	0.000268224
PLCL2	-0.978499	0.000846408	0.0051151
ZNF587B	-0.978895	9.68359e-11	1.87799e-08
TGS1	-0.979645	5.4718e-07	1.79979e-05
SNRPD1	-0.980425	7.35896e-06	0.000130512
MYBL1	-0.980704	0.00190762	0.00966297
MGME1	-0.982302	4.88979e-06	9.45844e-05
CLMP	-0.982561	0.000126411	0.00114577
KPNA2	-0.982948	1.35719e-06	3.51856e-05
TRIM36	-0.984216	0.00348625	0.0155822
NOP16	-0.986035	2.73497e-06	5.95354e-05
SH2D5	-0.986481	4.18493e-05	0.000487274
CEBPZ	-0.986989	1.1035e-06	3.04034e-05
RRP7A	-0.989487	4.57755e-06	8.99429e-05
LTV1	-0.990107	1.66538e-08	1.24346e-06
SFT2D2	-0.990416	1.02069e-05	0.000166035
EIF2S1	-0.990819	2.74693e-09	2.88873e-07
SRFBP1	-0.991483	9.39078e-08	4.59779e-06
ZNF718	-0.992007	0.000933708	0.00552201
EED	-0.992509	1.85808e-06	4.3903e-05
TTF2	-0.992786	1.072e-08	8.89344e-07
LSM6	-0.993213	3.22677e-11	9.2065e-09
ZNF736	-0.993543	0.000161716	0.00139027
C2orf88	-0.993671	0.000611029	0.00397928
MRM2	-0.99545	1.88142e-11	6.10765e-09
HNRNPA1	-0.998386	0.00022755	0.00183082
ZNF551	-0.998712	4.92666e-08	2.85154e-06
C18orf54	-0.999514	7.77148e-05	0.000791093
PFAS	-0.999797	0.000104966	0.00100093
POLR3G	-1.00142	0.000250998	0.0019821
ENOPH1	-1.0022	3.5645e-11	9.33836e-09
POLR1B	-1.00235	7.44404e-08	3.87323e-06
GEMIN5	-1.00456	3.45275e-08	2.21287e-06
CHRNA5	-1.00728	0.00104895	0.00604787
USP13	-1.00825	9.71263e-06	0.000160441
RPA3	-1.00892	4.53037e-06	8.91976e-05
NUP160	-1.00894	4.03622e-06	8.1121e-05
ZNF443	-1.00953	0.00119585	0.0067033
DDI2	-1.01307	8.02333e-07	2.41008e-05
SEH1L	-1.01469	9.60914e-09	8.24674e-07
SLC38A5	-1.01474	0.010774	0.0377583
SMC3	-1.01514	0.000106277	0.00100829
RPF2	-1.01526	8.72826e-08	4.38852e-06
HAUS3	-1.01583	6.10392e-07	1.97294e-05
CCNF	-1.01612	0.00212459	0.0105229
RNF182	-1.01651	0.00064003	0.00413211
CDK2	-1.01673	2.21237e-05	0.000296034
TSR1	-1.01675	2.35736e-09	2.55373e-07
CEP78	-1.01755	2.20553e-06	5.05141e-05
POP1	-1.01778	0.000291528	0.00223825
DARS2	-1.01788	8.39547e-07	2.49244e-05
POLR3K	-1.01887	2.20815e-05	0.000295741
PEG3	-1.01908	0.0130364	0.0438354
PPIF	-1.01917	1.20459e-06	3.26463e-05
NAA15	-1.02054	9.06301e-06	0.000152579
FANCE	-1.02138	8.4483e-05	0.000846133
ZNF730	-1.02139	0.000719007	0.00451701
HSP90AB1	-1.02188	1.94299e-07	8.0373e-06
GPATCH4	-1.02215	1.58038e-07	6.92075e-06
DNAJA4	-1.02222	0.000178818	0.00149932
SRSF3	-1.02311	3.47002e-05	0.000419577
NETO2	-1.02339	0.000382224	0.00277614
ARHGEF39	-1.02468	0.00224022	0.0109575
HSPE1	-1.02566	6.91043e-07	2.17708e-05
CLN6	-1.02576	1.69697e-06	4.09384e-05
FOXN2	-1.0259	1.32223e-06	3.45794e-05
RRP15	-1.02652	1.56352e-08	1.18518e-06
HNRNPH3	-1.02772	2.6585e-05	0.000342531
XPO4	-1.02831	8.77859e-07	2.58562e-05
WDR62	-1.02979	0.00695914	0.0269086
CDCA4	-1.03022	3.38094e-06	7.10093e-05
GEMIN2	-1.03057	1.85967e-05	0.000260511
STRIP2	-1.03068	0.00077122	0.00477472
ANP32B	-1.03074	9.24703e-07	2.66575e-05
CRACR2A	-1.03079	0.000579374	0.00382146
PET117	-1.03268	1.9195e-05	0.000266394
HNRNPA3	-1.03286	2.6784e-05	0.000343613
LRRCC1	-1.03373	0.00782761	0.0294284
UMPS	-1.03469	2.29147e-09	2.51607e-07
CENPO	-1.03532	1.68506e-07	7.25158e-06
PCGF6	-1.0365	1.05301e-07	5.02382e-06
B3GALNT1	-1.03811	3.0474e-08	2.01726e-06
LBR	-1.04001	0.000731703	0.00458327
SRSF1	-1.04008	1.01112e-06	2.85425e-05
KIF22	-1.0408	0.000461001	0.00321316
STEAP1	-1.04146	0.00714482	0.0274007
WDR3	-1.04175	8.50236e-08	4.29807e-06
MRE11	-1.04318	1.01841e-06	2.8694e-05
AFAP1L1	-1.04843	2.24313e-06	5.09844e-05
PLGRKT	-1.04998	1.39315e-06	3.58071e-05
CCDC150	-1.0501	0.000797008	0.00489698
XRCC3	-1.05017	0.00637178	0.0250922
EEF1AKMT2	-1.05207	9.03191e-05	0.000886743
CEP83	-1.05234	7.10959e-05	0.000738848
AMD1	-1.05272	0.000169558	0.00143864
SRSF12	-1.05273	0.00689119	0.026715
TRIM61	-1.05279	0.00693488	0.0268286
HAT1	-1.05367	9.9493e-07	2.82458e-05
FBXO45	-1.05439	3.17871e-08	2.07282e-06
PNO1	-1.05461	4.50501e-10	6.72733e-08
CASP8AP2	-1.05465	0.000109009	0.00102573
HMGN2	-1.05481	0.000278459	0.00215452
SUPT16H	-1.05533	5.54463e-06	0.000104279
PRIM2	-1.05593	1.55779e-08	1.18518e-06
TOPBP1	-1.05698	8.94638e-07	2.62178e-05
ZNF678	-1.0585	7.77161e-05	0.000791093
CACYBP	-1.05973	9.7872e-08	4.72985e-06
LIN9	-1.06188	2.02105e-06	4.70832e-05
PRKDC	-1.06217	1.01408e-05	0.000165264
HAUS6	-1.06246	1.50864e-07	6.66523e-06
DEPDC1B	-1.06307	0.00189469	0.0096138
RNASEH2A	-1.06363	0.00102553	0.00595187
ADCY1	-1.06405	0.0057807	0.0233054
CHCHD4	-1.06474	1.06997e-07	5.05629e-06
TCP1	-1.06719	9.19608e-11	1.86697e-08
RMI2	-1.06728	0.00324921	0.0147833
SPATA5	-1.06771	5.02209e-05	0.000559663
SLC6A20	-1.06853	0.00325871	0.014818
MCM5	-1.07007	0.00197105	0.00990368
CEP72	-1.07039	0.00082516	0.00502124
BRIX1	-1.07068	1.38362e-06	3.56668e-05
UCHL5	-1.07209	2.83705e-09	2.96264e-07
HSP90AA1	-1.07445	4.83826e-08	2.82225e-06
REP15	-1.07571	0.00399443	0.0173985
ETS1	-1.07575	4.73269e-06	9.25042e-05
CCT5	-1.07645	4.61085e-09	4.38559e-07
CENPP	-1.07751	1.42392e-06	3.63478e-05
FRMD3	-1.07883	0.00618907	0.0245335
MTARC1	-1.07938	9.29428e-05	0.00090595
CDC7	-1.0795	0.000258611	0.00202466
PCOLCE2	-1.07951	0.00522901	0.0215585
CSE1L	-1.08037	1.59491e-06	3.90069e-05
DCP2	-1.0817	2.06712e-05	0.000281902
CCDC15	-1.08173	0.00274426	0.0129356
NECTIN3	-1.08211	5.94014e-11	1.32394e-08
PSRC1	-1.08236	0.00279545	0.0131313
HAUS2	-1.08264	1.11308e-09	1.4329e-07
TRIM59	-1.08364	2.16403e-06	4.97927e-05
DCLRE1A	-1.08596	5.65263e-08	3.09197e-06
CTPS1	-1.08654	0.000543981	0.00363946
PAK1IP1	-1.08765	5.93077e-08	3.22052e-06
UTP18	-1.08874	7.4875e-08	3.87854e-06
ESF1	-1.08932	1.69419e-07	7.26992e-06
NUP205	-1.09048	6.01429e-06	0.000110744
CNTRL	-1.09063	0.000506294	0.00344598
ZNF460	-1.09169	0.0083888	0.0309538
FANCM	-1.09239	4.68925e-05	0.000531698
PNPT1	-1.09278	7.20839e-12	2.90927e-09
BORA	-1.09289	8.54257e-05	0.000851577
OXCT1	-1.09342	2.35767e-05	0.000311567
NUP37	-1.09391	9.88061e-07	2.81042e-05
TAF4B	-1.09438	1.26179e-05	0.000193851
MSH2	-1.0958	2.10119e-05	0.000284728
CENPN	-1.09665	1.11331e-05	0.000177051
DOCK2	-1.09693	0.000292724	0.00224628
GAS2L3	-1.09863	3.50172e-05	0.000422725
NOLC1	-1.09985	1.75007e-07	7.42439e-06
TIMM8A	-1.10059	3.62384e-08	2.30276e-06
CDKN3	-1.10082	0.00885016	0.0323365
CDCA3	-1.10119	0.00941022	0.0338854
QTRT2	-1.10191	6.55223e-09	5.82407e-07
RTTN	-1.10412	1.18333e-07	5.4539e-06
ADORA2B	-1.10461	9.5901e-05	0.000928722
NUP155	-1.10604	2.16853e-09	2.42132e-07
SDE2	-1.10727	1.16565e-06	3.1822e-05
MSH6	-1.10871	6.02185e-06	0.000110744
ZNF543	-1.10879	2.0849e-05	0.000283292
SELENOI	-1.11078	2.19321e-10	3.72173e-08
TROAP	-1.11101	0.00755972	0.0286303
FANCG	-1.1113	0.000663817	0.00425806
TMPO	-1.11155	5.26478e-05	0.000580213
TLCD4	-1.11244	8.12219e-05	0.000821182
PDSS1	-1.11303	1.50283e-08	1.15679e-06
UTP15	-1.1133	1.05126e-10	1.99406e-08
RHEBL1	-1.11588	0.0106047	0.0372963
MAGOHB	-1.11669	7.20556e-07	2.22776e-05
KIF18A	-1.12142	8.168e-06	0.0001415
RFWD3	-1.12242	3.42635e-11	9.30285e-09
CCDC138	-1.12287	1.00075e-05	0.000163503
NSD2	-1.1233	3.76119e-07	1.3341e-05
PCNA	-1.12353	9.18646e-05	0.000900141
SLC35G2	-1.12752	1.07155e-11	3.9028e-09
GLDC	-1.12923	0.00251457	0.012067
EXOSC8	-1.13127	0.000862958	0.00519619
CKS1B	-1.13486	1.32135e-05	0.000200526
HS6ST2	-1.13497	0.0115162	0.0397956
PUS7	-1.13701	2.21675e-08	1.57632e-06
TACC3	-1.13748	0.000236983	0.00189345
ZNF239	-1.13815	1.18022e-07	5.4539e-06
TAF1B	-1.1384	4.87441e-06	9.45318e-05
EXOSC9	-1.13947	1.14266e-05	0.000179731
NIP7	-1.14008	7.47486e-09	6.56601e-07
FIGNL1	-1.14032	6.78231e-06	0.000121877
SASS6	-1.14178	7.65801e-06	0.000134538
ALG10	-1.14299	9.95617e-09	8.39975e-07
RFC2	-1.14401	4.34192e-06	8.62207e-05
PDE3B	-1.14442	0.00130903	0.0072105
MIS18BP1	-1.14526	0.000377628	0.00275441
NOP56	-1.14528	1.33257e-08	1.05287e-06
GEN1	-1.14541	1.00169e-09	1.31212e-07
HMGB1	-1.14594	3.39488e-06	7.12018e-05
TIMELESS	-1.14749	0.000450425	0.00315192
NCR3LG1	-1.14905	0.00912751	0.0330828
NOP58	-1.1502	1.16927e-09	1.47132e-07
ITPRIPL1	-1.15109	0.000886002	0.00531352
CIT	-1.15518	0.0017832	0.00920131
NPL	-1.15531	0.00930502	0.0335957
PASK	-1.15761	0.000164215	0.00140609
FGF5	-1.15877	0.00706209	0.0272124
DCK	-1.15879	1.05927e-11	3.9028e-09
SLC7A2	-1.16033	0.00011479	0.00106669
POLE	-1.16292	1.83662e-05	0.000258494
PRTFDC1	-1.16391	9.21422e-05	0.00090122
ZNF726	-1.16422	0.000115687	0.001073
TNFRSF10A	-1.16523	6.14776e-08	3.30232e-06
RAD18	-1.16637	7.50304e-07	2.29093e-05
TRPC4	-1.16942	0.0047511	0.0199292
KHK	-1.17092	0.00729137	0.0278476
CDC20	-1.17109	0.00905924	0.0328992
ZYG11A	-1.17178	0.00171243	0.00890688
SCLT1	-1.17314	7.3387e-06	0.000130308
RPL39L	-1.17424	0.00078448	0.00483277
SMC1A	-1.17567	4.11574e-09	3.99093e-07
CEP135	-1.17982	7.22955e-06	0.000128829
C5orf34	-1.1845	5.31271e-06	0.000101063
RIF1	-1.18812	9.42102e-06	0.000157189
TYMS	-1.18826	0.00277814	0.0130614
CLIC6	-1.18889	0.0133633	0.0446429
NEMP2	-1.19266	0.000115117	0.00106906
MRTO4	-1.19315	1.35521e-09	1.64159e-07
GCLM	-1.19336	1.73103e-08	1.27337e-06
PRR11	-1.20239	0.000447885	0.00313709
NETO1	-1.20351	0.0053176	0.0218573
CBX5	-1.20705	4.31442e-08	2.58562e-06
GGCT	-1.20822	1.242e-08	9.87846e-07
DDX18	-1.21016	3.34225e-08	2.15433e-06
GJC1	-1.21018	8.49755e-06	0.000145435
OBI1	-1.21262	1.08757e-07	5.12322e-06
NCL	-1.21374	4.85214e-11	1.11472e-08
KIF24	-1.21477	0.000590063	0.00386974
NUP210	-1.21481	0.0152104	0.049217
H2BC9	-1.21917	0.00437945	0.0186906
SCML2	-1.21953	0.00135894	0.0074279
NUP35	-1.22031	6.07903e-07	1.96916e-05
DDIT4L	-1.22184	0.000157995	0.00136615
DSN1	-1.22312	4.8857e-07	1.63951e-05
DBF4	-1.22466	6.67454e-05	0.000702898
CHAF1A	-1.22628	9.46251e-05	0.000919946
LYAR	-1.22651	6.16765e-05	0.00066043
POLD3	-1.2281	4.21561e-05	0.000489897
ANP32E	-1.22861	2.66325e-05	0.000342552
C3orf52	-1.2302	6.5874e-08	3.47596e-06
APOC1	-1.23073	0.00925965	0.0334805
GINS3	-1.23087	1.21315e-06	3.27593e-05
E2F1	-1.23113	0.00885462	0.032338
RPL22L1	-1.23186	1.04335e-05	0.000168978
TFAM	-1.232	1.65444e-05	0.000241223
TAF1A	-1.23415	5.05614e-05	0.000562648
SOAT1	-1.23517	6.05521e-11	1.32974e-08
POLR1G	-1.24155	0.000330018	0.00247025
PPARGC1B	-1.2416	7.36423e-07	2.25684e-05
KBTBD8	-1.24251	0.000664669	0.0042617
DDX11	-1.24631	8.81992e-05	0.000872238
UBE2C	-1.24701	0.00616378	0.0244797
MCM2	-1.25008	8.81047e-06	0.000149338
ZNF714	-1.25396	1.77481e-05	0.000252412
CYCS	-1.25703	1.67072e-11	5.54418e-09
CPS1	-1.25863	0.0124722	0.0423772
POC1A	-1.26059	3.1896e-07	1.18483e-05
HAUS8	-1.26081	6.65166e-05	0.000701477
CHAC2	-1.26104	1.089e-05	0.000174298
EZH2	-1.26204	1.79801e-05	0.000254499
TEX30	-1.26286	3.26588e-07	1.20716e-05
URB2	-1.26501	5.87513e-08	3.20195e-06
CALML4	-1.2654	0.00620529	0.0245857
GPR63	-1.26766	8.58118e-05	0.000853715
STIL	-1.2681	2.21749e-06	5.07102e-05
COCH	-1.26914	0.0126417	0.042836
ZNF573	-1.27415	0.00456367	0.0193058
KIF18B	-1.27444	0.00581416	0.0233995
PARPBP	-1.2762	0.000252076	0.00198642
PRIMPOL	-1.2786	1.06845e-10	1.99406e-08
CCNB2	-1.27897	0.000810549	0.00495657
LRR1	-1.28093	8.93103e-08	4.4308e-06
E2F7	-1.2817	0.000138744	0.00123325
MCM3	-1.283	5.83305e-06	0.000108729
SLF1	-1.28402	1.03316e-06	2.8946e-05
LRRC37A	-1.28404	0.00813727	0.0302574
FERMT1	-1.28489	3.12274e-05	0.000386345
CMSS1	-1.28551	5.10895e-07	1.69915e-05
DDX21	-1.28622	1.35738e-09	1.64159e-07
RFC5	-1.28734	3.60392e-05	0.000432268
MTMR8	-1.29006	0.00567048	0.0229353
MZT1	-1.29037	4.4131e-07	1.51149e-05
GOLGA8T	-1.29328	0.00139059	0.00755663
CENPM	-1.29508	0.00105341	0.00606421
COQ3	-1.29523	1.69637e-05	0.000245227
IL6R	-1.29966	7.10992e-05	0.000738848
TFRC	-1.3002	9.21623e-06	0.000154636
SUV39H2	-1.30134	2.57561e-07	1.00685e-05
FKBP5	-1.30238	0.000169522	0.00143864
MCM7	-1.30464	9.10295e-07	2.6395e-05
GTSE1	-1.30863	0.00169167	0.00880815
ZNF681	-1.31058	1.06656e-07	5.05617e-06
CCDC18	-1.31272	0.000127144	0.00115069
MCM8	-1.31303	1.65021e-07	7.13024e-06
DHFR	-1.31408	2.11178e-05	0.000285387
LONRF3	-1.31633	0.000214669	0.00174981
SMC2	-1.31685	2.68378e-06	5.89366e-05
PIGW	-1.31722	7.10433e-12	2.90927e-09
PAQR5	-1.32069	0.00388812	0.0170468
MCM4	-1.32332	0.000116925	0.00108114
CGAS	-1.33071	4.95378e-05	0.000554119
NUSAP1	-1.33258	0.00161095	0.00847053
TCF19	-1.33686	0.000703059	0.00444487
RFC4	-1.33713	5.89658e-06	0.000109112
UBE2T	-1.34043	0.000121616	0.00111349
DNAJC9	-1.34092	4.68354e-08	2.75351e-06
EXOSC2	-1.34341	7.77556e-09	6.7902e-07
TNFRSF11A	-1.34438	4.71294e-05	0.000533979
NDC1	-1.34545	4.02422e-09	3.96458e-07
CENPW	-1.34613	5.13238e-05	0.000567297
NUP107	-1.34657	4.69821e-09	4.44041e-07
CENPQ	-1.34679	6.14235e-05	0.000658462
NCAPD3	-1.35041	8.95664e-06	0.0001513
POLA1	-1.35174	3.81085e-06	7.77423e-05
TRAIP	-1.35194	0.000142491	0.00125684
ZNF519	-1.35336	3.45231e-05	0.000417854
CDC25C	-1.35608	0.000941269	0.00555499
PKMYT1	-1.35752	0.00681494	0.0264468
NR2C2AP	-1.36034	7.98968e-06	0.000139707
FAM83D	-1.36546	0.000676459	0.0043134
MASTL	-1.37223	3.98851e-06	8.04871e-05
ITGA6	-1.37234	7.15551e-07	2.21687e-05
HJURP	-1.37555	0.00131884	0.00725386
GPAT3	-1.37962	0.000206313	0.00169583
TIPIN	-1.38314	2.89089e-08	1.95291e-06
HASPIN	-1.38504	0.00172839	0.00897742
SPAG5	-1.38508	0.000695574	0.00440875
KNSTRN	-1.39025	8.83808e-08	4.41401e-06
AUNIP	-1.39276	3.47569e-07	1.25672e-05
CENPH	-1.39327	5.66368e-05	0.000616353
RRM1	-1.39581	6.85723e-06	0.000123076
ZNF530	-1.39686	6.33814e-12	2.78375e-09
CENPJ	-1.39857	2.50806e-06	5.57334e-05
EME1	-1.40257	5.88506e-05	0.000635853
C1orf112	-1.40486	3.4178e-07	1.2418e-05
KIF20A	-1.40729	0.00384359	0.0168863
TMEM97	-1.41143	8.5841e-06	0.000146666
MYBL2	-1.41462	0.00473696	0.0198867
RMI1	-1.41601	2.12608e-08	1.52638e-06
TMSB15A	-1.4164	0.000578343	0.00381635
UTP20	-1.41726	2.47274e-07	9.7172e-06
MND1	-1.41863	0.00207017	0.0102977
NASP	-1.41925	3.96831e-06	8.01878e-05
MELK	-1.4211	3.82436e-05	0.000454329
IQGAP3	-1.42375	0.000913716	0.00544257
ZWINT	-1.42529	0.000168156	0.00143081
DKC1	-1.42538	3.81795e-11	9.8299e-09
PTPRC	-1.42818	0.000950753	0.00559467
RACGAP1	-1.42904	1.81591e-07	7.66018e-06
SFMBT1	-1.43581	6.80396e-07	2.15074e-05
KNTC1	-1.43745	1.76388e-06	4.21237e-05
SGO1	-1.43866	7.12102e-05	0.000739253
GALNT13	-1.43911	0.00540826	0.0221447
ZNF695	-1.44011	2.53512e-10	4.07064e-08
AURKA	-1.44451	1.69205e-05	0.000244839
VRK1	-1.44549	1.07755e-06	2.98383e-05
NXPH2	-1.44677	0.0154575	0.0498331
ASF1B	-1.44802	0.00162878	0.0085402
SPC25	-1.45018	0.000233655	0.00187189
HMOX1	-1.45301	0.000788831	0.00485557
MCM6	-1.45375	1.58131e-05	0.000232877
CKS2	-1.45593	3.30877e-11	9.2065e-09
CD274	-1.45669	6.73326e-05	0.000708582
FANCA	-1.46514	0.000280253	0.00216616
ARHGAP19	-1.4719	1.43137e-05	0.0002148
ADGRB3	-1.47248	6.78007e-05	0.000712503
TPX2	-1.47833	4.67482e-05	0.000530464
PPAT	-1.4828	4.38407e-09	4.19662e-07
MEIOC	-1.48295	0.0124792	0.0423912
CENPK	-1.48316	5.10007e-05	0.00056498
CEP128	-1.48377	9.7583e-06	0.00016084
GMNN	-1.48683	2.93192e-05	0.00036916
FBXO43	-1.48997	0.00132856	0.00729928
ZNF492	-1.49055	1.2443e-06	3.32399e-05
OIP5	-1.49118	0.000286751	0.0022087
MT1M	-1.49316	0.000177564	0.00148964
ZWILCH	-1.49555	1.17385e-06	3.19874e-05
SPDL1	-1.49611	2.62129e-06	5.79906e-05
RGS7	-1.50373	0.0127273	0.0430187
FAM72B	-1.50444	0.00045608	0.00318403
HPDL	-1.51225	0.00110857	0.00630159
ODC1	-1.51591	5.49608e-10	7.81648e-08
MTFR2	-1.5162	1.13594e-07	5.28442e-06
ESPL1	-1.51861	0.000204504	0.00168355
SGO2	-1.521	2.92139e-05	0.000368144
FEN1	-1.52114	2.1988e-06	5.04374e-05
H2AZ1	-1.52609	8.2387e-08	4.2133e-06
ZNF90	-1.53054	0.00024294	0.00193381
KIFC1	-1.53324	0.000511338	0.00347082
ACTN2	-1.53816	0.0138477	0.0458003
CDCA8	-1.54055	0.000149155	0.00130406
SMC4	-1.54182	8.85627e-05	0.000874601
OTULINL	-1.54394	8.03735e-07	2.41008e-05
TICRR	-1.54547	0.000211456	0.00172739
WDHD1	-1.54669	2.04298e-07	8.26772e-06
ENAM	-1.5474	2.43128e-06	5.43508e-05
NEMP1	-1.55022	1.22978e-09	1.51771e-07
BUB1B	-1.55131	8.52137e-05	0.000850599
TRIP13	-1.55225	2.64164e-05	0.000340653
E2F2	-1.55309	0.00070071	0.0044333
GBX2	-1.55464	0.0055419	0.0225742
AURKB	-1.55608	0.000272321	0.00211031
CCNA2	-1.5577	0.000567496	0.00375806
PIMREG	-1.55936	0.000124891	0.00113498
XRCC2	-1.55995	2.04623e-05	0.000280333
UHRF1	-1.56453	6.64445e-05	0.000701212
PRC1	-1.56576	3.68167e-05	0.00044018
TRIM71	-1.57454	0.00761135	0.0288001
DNA2	-1.57505	1.41214e-07	6.27604e-06
USP1	-1.57702	5.9053e-07	1.92962e-05
FBXO5	-1.58417	3.7785e-05	0.000449875
MMS22L	-1.58644	1.22146e-07	5.57745e-06
HELLS	-1.59131	1.19965e-05	0.00018603
DMC1	-1.59141	2.01814e-05	0.000277248
CEP152	-1.59531	8.03528e-06	0.000139999
POLE2	-1.59927	0.000170651	0.00144545
XK	-1.6	0.0012781	0.00708722
HSPD1	-1.60319	5.92827e-09	5.36854e-07
SKA3	-1.60359	0.000135794	0.00121136
KIF20B	-1.61123	5.88272e-05	0.000635853
BRI3BP	-1.6147	1.12352e-10	2.04603e-08
KIF23	-1.61878	1.13396e-05	0.000179189
PLK4	-1.62805	0.000425248	0.00301242
TEX15	-1.63404	0.000220379	0.00178559
TMPPE	-1.64078	4.45946e-06	8.80836e-05
RTL3	-1.64156	0.00402891	0.0175149
BRIP1	-1.64326	1.34746e-05	0.000204281
ORC1	-1.64612	0.000224865	0.00181411
RAD51	-1.64769	1.23079e-06	3.30888e-05
ZNF724	-1.64828	7.52433e-07	2.29093e-05
PCLAF	-1.65438	4.66004e-05	0.000529592
NEK2	-1.65451	5.89313e-05	0.000635853
MTBP	-1.65753	1.55575e-06	3.84991e-05
CENPI	-1.65993	1.09361e-05	0.000174662
KITLG	-1.66399	0.00032286	0.00243375
GINS2	-1.66814	0.000345836	0.00256775
BIRC5	-1.67245	0.000258692	0.00202466
CDCA5	-1.67513	1.79205e-05	0.000254138
NCAPH	-1.67941	8.24278e-05	0.000831124
SKA1	-1.6797	7.03361e-06	0.000125637
CIP2A	-1.68114	2.22131e-06	5.07198e-05
MSR1	-1.68259	0.0140916	0.046391
E2F8	-1.69173	0.00130505	0.00719921
ORC6	-1.69562	1.6387e-07	7.13024e-06
HMGB2	-1.69685	4.95366e-05	0.000554119
ZNF257	-1.69735	0.000441598	0.00310178
MME	-1.70012	0.000250486	0.00197911
WDR76	-1.70165	8.65474e-05	0.00085924
CDC45	-1.70493	0.00050217	0.00342289
HLF	-1.70526	0.0142017	0.0466181
MKI67	-1.71004	0.000353435	0.0026061
ANLN	-1.71737	3.02935e-05	0.000378238
FANCD2	-1.72131	1.1505e-06	3.15816e-05
CCNB1	-1.72237	4.26015e-06	8.50492e-05
ASPM	-1.72433	0.000282763	0.00218329
BRCA1	-1.73197	1.22321e-06	3.29715e-05
CENPA	-1.73493	1.88662e-05	0.000263316
TTK	-1.74379	0.00016646	0.00141891
KIF15	-1.74685	3.88632e-05	0.00045986
ARHGAP11B	-1.74955	3.85058e-05	0.000456717
CEP55	-1.74969	5.63235e-05	0.000613926
CKAP2L	-1.75755	0.000104934	0.00100093
BLM	-1.7581	1.63062e-05	0.000238493
KIF11	-1.76257	6.94051e-05	0.000725297
ADA2	-1.76747	0.00181537	0.00931258
KIF2C	-1.78448	6.81993e-05	0.000715518
SHCBP1	-1.78716	2.27944e-05	0.000303918
ESCO2	-1.79054	0.000565692	0.0037511
GINS4	-1.79962	1.46174e-07	6.47721e-06
CDCA2	-1.80296	3.53025e-05	0.000424797
DDIAS	-1.80799	1.41724e-05	0.000212914
RAD54L	-1.80884	0.000261301	0.00203867
BUB1	-1.81131	1.52109e-05	0.000224674
LMNB1	-1.81222	3.06849e-05	0.000381848
F3	-1.81263	0.000253705	0.00199504
NDC80	-1.82149	0.000158971	0.0013722
RBL1	-1.82182	1.22619e-09	1.51771e-07
BARD1	-1.83047	5.12602e-06	9.79612e-05
POMK	-1.83151	4.13704e-05	0.000482644
FAM72D	-1.83273	0.00199817	0.010013
KIF4A	-1.8343	8.02763e-05	0.000813274
CENPE	-1.83747	3.50528e-05	0.000422732
PSMC3IP	-1.84296	9.29106e-07	2.67328e-05
NCAPG2	-1.85544	1.54584e-06	3.84179e-05
MYO3A	-1.86017	0.00176292	0.00911859
RAD51AP1	-1.86136	3.10722e-05	0.000384816
CDCA7	-1.87093	4.90941e-05	0.000549979
ZNF367	-1.87277	6.60475e-07	2.10296e-05
TOP2A	-1.8738	7.71015e-05	0.000788439
NUP62CL	-1.87733	0.000804173	0.0049282
PRIM1	-1.87738	3.45157e-06	7.19865e-05
KIF14	-1.88216	8.39322e-05	0.000843726
ZGRF1	-1.88223	1.1384e-09	1.45297e-07
BRCA2	-1.88524	3.547e-06	7.35658e-05
DTL	-1.88658	1.59308e-05	0.000234148
ATAD5	-1.88964	1.04444e-05	0.000168978
DEPDC1	-1.89244	7.73624e-05	0.00078972
CDK1	-1.89318	5.52402e-05	0.000603881
GINS1	-1.91029	4.91956e-09	4.59148e-07
RFC3	-1.91655	2.08653e-07	8.4132e-06
CENPU	-1.91859	6.12569e-07	1.9757e-05
CENPF	-1.91988	2.86334e-05	0.000363003
FANCI	-1.92384	2.03263e-07	8.26306e-06
NCAPG	-1.924	2.4004e-05	0.00031635
NEIL3	-1.93458	3.72379e-05	0.000444149
DLGAP5	-1.93555	0.000165824	0.00141662
RRM2	-1.93809	3.72079e-05	0.000444145
EXO1	-1.95759	9.51724e-05	0.000923463
ZNF878	-1.96085	0.00013021	0.00117275
ATAD2	-1.9745	1.22508e-07	5.57745e-06
PTPN20	-1.98498	9.65217e-05	0.000934066
KNL1	-1.99301	3.65203e-05	0.000437335
DSCC1	-1.99427	6.30304e-05	0.000670165
NUF2	-1.99464	2.89737e-05	0.000366044
CDC6	-2.00546	3.45685e-06	7.1996e-05
FAM111B	-2.00899	0.00010681	0.00101077
ERCC6L	-2.02948	7.53342e-06	0.000132975
ARHGAP11A	-2.03477	1.47572e-06	3.72244e-05
FAM81A	-2.04105	0.000929652	0.00550893
PBK	-2.04401	4.00425e-05	0.000471573
FANCB	-2.04801	1.64524e-05	0.000240161
HMMR	-2.07159	7.5465e-06	0.000133046
POLQ	-2.09894	3.07009e-06	6.49373e-05
MAD2L1	-2.10076	1.05688e-07	5.02624e-06
CDC25A	-2.12704	2.02347e-08	1.46682e-06
CYBB	-2.19981	0.00822344	0.0305246
MCM10	-2.2434	2.43782e-05	0.000319511
LCP1	-2.30055	1.2478e-06	3.32685e-05
A2M	-2.33524	0.0131143	0.0440178
ADAMTS18	-2.36394	0.000175761	0.00147784
CLSPN	-2.36626	2.92519e-07	1.12293e-05
GAL	-2.41259	0.00014224	0.00125536
PTGER3	-2.43444	0.00218947	0.0107692
KIF1A	-2.43805	0.000422059	0.00299696
CCNE2	-2.45733	2.95654e-07	1.13205e-05
TDRD9	-2.47449	0.00649625	0.0254615
LRRTM1	-2.63503	0.00741263	0.0282105
ZNF732	-2.69115	0.000260028	0.00203085
VGF	-2.73182	0.000408709	0.00291837
GABBR2	-2.98304	0.00341506	0.0153652
MMP12	-3.24655	0.00902361	0.0327938
CD53	-3.34309	0.00224156	0.0109605
MRC1	-3.58955	0.0023666	0.0114667
HBG2	-5.06254	0.00883787	0.0323074
