# Supplementary material for: Transcriptome research of human amniocytes identifies hub genes associated with developmental dysplasia in down syndrome
Source: Aging (Albany NY). 2023 Dec 12;15(23):14086–108. doi: 10.18632/aging.205291 (PMC10756088; doi:10.18632/aging.205291)
Supplement: Supplementary Table 4 [file aging-15-205291-s004.xls]

## Sheet: UP
Supplementary Table 4. Enriched GO terms of up- and downregulated DEGs.
GO_P Term ID	GO_P Term Desc	GO_P Term Level1	GO_P Term Level2	Term Candidate Gene Num	Total Candidate Gene Num	Term Gene Num	Total Gene Num	Rich Ratio	P value	Q value
GO:0030198	extracellular matrix organization	biological_process	cellular component organization or biogenesis	85	1650	256	17387	0.332031	4.06514e-26	2.21225e-22
GO:0007155	cell adhesion	biological_process	biological adhesion	150	1650	683	17387	0.219619	2.05576e-23	5.59373e-20
GO:0030199	collagen fibril organization	biological_process	cellular process	37	1650	102	17387	0.362745	1.77789e-13	3.2251e-10
GO:0007156	homophilic cell adhesion via plasma membrane adhesion molecules	biological_process	biological adhesion	44	1650	167	17387	0.263473	2.35079e-10	3.19824e-07
GO:0001525	angiogenesis	biological_process	developmental process	55	1650	271	17387	0.202952	4.3928e-08	4.78112e-05
GO:0008285	negative regulation of cell proliferation	biological_process	biological regulation	79	1650	456	17387	0.173246	9.21519e-08	8.35818e-05
GO:0060337	type I interferon signaling pathway	biological_process	cellular process	22	1650	68	17387	0.323529	1.50468e-07	0.000116978
GO:0045071	negative regulation of viral genome replication	biological_process	biological regulation	16	1650	45	17387	0.355556	1.80313e-06	0.00122658
GO:0032331	negative regulation of chondrocyte differentiation	biological_process	cellular process	11	1650	23	17387	0.478261	2.50122e-06	0.00139127
GO:0043065	positive regulation of apoptotic process	biological_process	cellular process	64	1650	375	17387	0.170667	2.55655e-06	0.00139127
GO:0001957	intramembranous ossification	biological_process	multicellular organismal process	6	1650	7	17387	0.857143	4.65969e-06	0.00230527
GO:0048706	embryonic skeletal system development	biological_process	developmental process	14	1650	39	17387	0.358974	6.99504e-06	0.00317225
GO:0007507	heart development	biological_process	developmental process	48	1650	269	17387	0.178439	1.34824e-05	0.00564394
GO:0007162	negative regulation of cell adhesion	biological_process	biological adhesion	16	1650	52	17387	0.307692	1.52157e-05	0.00591454
GO:0007399	nervous system development	biological_process	developmental process	85	1650	574	17387	0.148084	2.21398e-05	0.00803231
GO:0051607	defense response to virus	biological_process	multi-organism process	40	1650	217	17387	0.184332	3.20567e-05	0.0106282
GO:0048704	embryonic skeletal system morphogenesis	biological_process	developmental process	16	1650	55	17387	0.290909	3.32008e-05	0.0106282
GO:0038063	collagen-activated tyrosine kinase receptor signaling pathway	biological_process	biological regulation	7	1650	12	17387	0.583333	3.52855e-05	0.010668
GO:0031065	positive regulation of histone deacetylation	biological_process	biological regulation	8	1650	16	17387	0.5	4.14434e-05	0.0118703
GO:0042060	wound healing	biological_process	response to stimulus	25	1650	113	17387	0.221239	4.63586e-05	0.012038
GO:0070374	positive regulation of ERK1 and ERK2 cascade	biological_process	biological regulation	41	1650	228	17387	0.179825	4.64531e-05	0.012038
GO:0016079	synaptic vesicle exocytosis	biological_process	biological regulation	10	1650	25	17387	0.4	4.95665e-05	0.012261
GO:0032736	positive regulation of interleukin-13 production	biological_process	biological regulation	7	1650	13	17387	0.538462	7.0173e-05	0.0166036
GO:0007411	axon guidance	biological_process	cellular component organization or biogenesis	42	1650	242	17387	0.173554	8.76058e-05	0.0198646
GO:0002376	immune system process	biological_process	immune system process	81	1650	563	17387	0.143872	9.37228e-05	0.0204016
GO:0061061	muscle structure development	biological_process	developmental process	6	1650	10	17387	0.6	0.000108576	0.0227259
GO:0030574	collagen catabolic process	biological_process	metabolic process	13	1650	43	17387	0.302326	0.000116152	0.023411
GO:0007160	cell-matrix adhesion	biological_process	biological adhesion	22	1650	99	17387	0.222222	0.000120758	0.0234701
GO:0042476	odontogenesis	biological_process	developmental process	12	1650	38	17387	0.315789	0.00013292	0.0249431
GO:0016477	cell migration	biological_process	localization	46	1650	279	17387	0.164875	0.000146535	0.0265814
GO:0006897	endocytosis	biological_process	localization	42	1650	248	17387	0.169355	0.000153548	0.026955
GO:0098609	cell-cell adhesion	biological_process	biological adhesion	35	1650	195	17387	0.179487	0.000167784	0.0285337
GO:0010718	positive regulation of epithelial to mesenchymal transition	biological_process	biological regulation	13	1650	45	17387	0.288889	0.000193644	0.0319336
GO:0016525	negative regulation of angiogenesis	biological_process	biological regulation	21	1650	96	17387	0.21875	0.000215593	0.0341516
GO:0048251	elastic fiber assembly	biological_process	cellular component organization or biogenesis	6	1650	11	17387	0.545455	0.000219644	0.0341516
GO:0071526	semaphorin-plexin signaling pathway	biological_process	biological regulation	12	1650	40	17387	0.3	0.000229326	0.0346665
GO:0009615	response to virus	biological_process	response to stimulus	25	1650	125	17387	0.2	0.000255145	0.0375271
GO:0032332	positive regulation of chondrocyte differentiation	biological_process	biological regulation	8	1650	20	17387	0.4	0.000286765	0.0408621
GO:0060325	face morphogenesis	biological_process	developmental process	10	1650	30	17387	0.333333	0.000292837	0.0408621
GO:0008344	adult locomotory behavior	biological_process	behavior	14	1650	53	17387	0.264151	0.000313556	0.0426593
GO:1903214	regulation of protein targeting to mitochondrion	biological_process	biological regulation	5	1650	8	17387	0.625	0.000335227	0.0432539
GO:0061337	cardiac conduction	biological_process	biological regulation	11	1650	36	17387	0.305556	0.000348288	0.0432539
GO:0050808	synapse organization	biological_process	cellular component organization or biogenesis	16	1650	66	17387	0.242424	0.000350392	0.0432539
GO:1904262	negative regulation of TORC1 signaling	biological_process	cellular process	7	1650	16	17387	0.4375	0.00036206	0.0432539
GO:0018057	peptidyl-lysine oxidation	biological_process	cellular process	4	1650	5	17387	0.8	0.000373564	0.0432539
GO:0043932	ossification involved in bone remodeling	biological_process	multicellular organismal process	4	1650	5	17387	0.8	0.000373564	0.0432539
GO:0045843	negative regulation of striated muscle tissue development	biological_process	regulation of biological process	4	1650	5	17387	0.8	0.000373564	0.0432539

## Sheet: DOWN
GO_P Term ID	GO_P Term Desc	GO_P Term Level1	GO_P Term Level2	Term Candidate Gene Num	Total Candidate Gene Num	Term Gene Num	Total Gene Num	Rich Ratio	P value	Q value
GO:0007049	cell cycle	biological_process	cellular process	182	1334	671	17387	0.271237	7.39347e-55	2.88197e-51
GO:0051301	cell division	biological_process	cellular process	139	1334	432	17387	0.321759	2.17535e-51	4.23976e-48
GO:0006281	DNA repair	biological_process	metabolic process	132	1334	412	17387	0.320388	1.50656e-48	1.95752e-45
GO:0006260	DNA replication	biological_process	metabolic process	83	1334	167	17387	0.497006	5.68263e-48	5.53772e-45
GO:0007052	mitotic spindle organization	biological_process	cellular component organization or biogenesis	67	1334	129	17387	0.51938	1.713e-40	1.33021e-37
GO:0006974	cellular response to DNA damage stimulus	biological_process	cellular process	139	1334	525	17387	0.264762	2.04752e-40	1.33021e-37
GO:0006270	DNA replication initiation	biological_process	cellular process	33	1334	43	17387	0.767442	9.93668e-29	5.53331e-26
GO:0006364	rRNA processing	biological_process	cellular component organization or biogenesis	68	1334	216	17387	0.314815	7.19212e-25	3.50436e-22
GO:0007059	chromosome segregation	biological_process	cellular process	43	1334	96	17387	0.447917	4.19513e-23	1.81696e-20
GO:0042254	ribosome biogenesis	biological_process	cellular component organization or biogenesis	43	1334	104	17387	0.413462	2.00454e-21	7.8137e-19
GO:0036297	interstrand cross-link repair	biological_process	cellular process	30	1334	53	17387	0.566038	2.86528e-20	1.01535e-17
GO:0000070	mitotic sister chromatid segregation	biological_process	cellular component organization or biogenesis	24	1334	34	17387	0.705882	8.83348e-20	2.86941e-17
GO:0000278	mitotic cell cycle	biological_process	cellular process	50	1334	160	17387	0.3125	1.80765e-18	5.42018e-16
GO:0000398	mRNA splicing, via spliceosome	biological_process	cellular process	65	1334	263	17387	0.247148	1.112e-17	3.09613e-15
GO:0008380	RNA splicing	biological_process	cellular process	71	1334	308	17387	0.230519	1.99361e-17	5.18074e-15
GO:0006409	tRNA export from nucleus	biological_process	localization	22	1334	34	17387	0.647059	5.58451e-17	1.36052e-14
GO:0000086	G2/M transition of mitotic cell cycle	biological_process	cellular process	44	1334	137	17387	0.321168	6.4539e-17	1.47984e-14
GO:0051028	mRNA transport	biological_process	localization	39	1334	112	17387	0.348214	1.6861e-16	3.65134e-14
GO:0006397	mRNA processing	biological_process	metabolic process	79	1334	386	17387	0.204663	4.47927e-16	9.18958e-14
GO:0032508	DNA duplex unwinding	biological_process	cellular component organization or biogenesis	33	1334	85	17387	0.388235	8.74563e-16	1.70452e-13
GO:0010389	regulation of G2/M transition of mitotic cell cycle	biological_process	biological regulation	31	1334	79	17387	0.392405	4.58778e-15	8.51579e-13
GO:0006406	mRNA export from nucleus	biological_process	localization	36	1334	106	17387	0.339623	6.02368e-15	1.06729e-12
GO:0034080	CENP-A containing nucleosome assembly	biological_process	cellular component organization or biogenesis	23	1334	44	17387	0.522727	7.8758e-15	1.33478e-12
GO:0075733	intracellular transport of virus	biological_process	multi-organism process	23	1334	46	17387	0.5	2.77337e-14	4.50442e-12
GO:1900034	regulation of cellular response to heat	biological_process	cellular process	29	1334	74	17387	0.391892	3.64705e-14	5.68648e-12
GO:0000724	double-strand break repair via homologous recombination	biological_process	cellular process	30	1334	89	17387	0.337079	1.36775e-12	2.05057e-10
GO:0032201	telomere maintenance via semi-conservative replication	biological_process	biological regulation	18	1334	34	17387	0.529412	5.11509e-12	7.38468e-10
GO:0007084	mitotic nuclear envelope reassembly	biological_process	cellular component organization or biogenesis	22	1334	52	17387	0.423077	7.16179e-12	9.97024e-10
GO:1901796	regulation of signal transduction by p53 class mediator	biological_process	regulation of biological process	38	1334	145	17387	0.262069	1.00323e-11	1.34848e-09
GO:0006310	DNA recombination	biological_process	cellular process	31	1334	103	17387	0.300971	1.6874e-11	2.1925e-09
GO:0000723	telomere maintenance	biological_process	biological regulation	22	1334	54	17387	0.407407	1.77928e-11	2.2373e-09
GO:0006271	DNA strand elongation involved in DNA replication	biological_process	metabolic process	11	1334	13	17387	0.846154	3.52316e-11	4.16248e-09
GO:0006110	regulation of glycolytic process	biological_process	biological regulation	20	1334	46	17387	0.434783	3.5239e-11	4.16248e-09
GO:0016032	viral process	biological_process	multi-organism process	74	1334	431	17387	0.171694	3.64214e-11	4.17561e-09
GO:0036388	pre-replicative complex assembly	biological_process	cellular component organization or biogenesis	23	1334	61	17387	0.377049	4.11216e-11	4.57977e-09
GO:0031145	anaphase-promoting complex-dependent catabolic process	biological_process	cellular process	27	1334	86	17387	0.313953	1.1593e-10	1.25526e-08
GO:0051321	meiotic cell cycle	biological_process	cellular process	34	1334	130	17387	0.261538	1.30109e-10	1.37071e-08
GO:0007051	spindle organization	biological_process	cellular component organization or biogenesis	12	1334	17	17387	0.705882	1.70933e-10	1.75341e-08
GO:0097711	ciliary basal body-plasma membrane docking	biological_process	cellular component organization or biogenesis	28	1334	94	17387	0.297872	2.09861e-10	2.09754e-08
GO:0000727	double-strand break repair via break-induced replication	biological_process	cellular process	10	1334	12	17387	0.833333	3.9171e-10	3.81721e-08
GO:0007094	mitotic spindle assembly checkpoint	biological_process	biological regulation	15	1334	29	17387	0.517241	4.82752e-10	4.58968e-08
GO:0051382	kinetochore assembly	biological_process	cellular component organization or biogenesis	11	1334	15	17387	0.733333	5.33587e-10	4.9522e-08
GO:0060964	regulation of gene silencing by miRNA	biological_process	cellular process	25	1334	82	17387	0.304878	1.12765e-09	1.02223e-07
GO:0006913	nucleocytoplasmic transport	biological_process	localization	16	1334	35	17387	0.457143	1.32171e-09	1.17091e-07
GO:0034501	protein localization to kinetochore	biological_process	localization	10	1334	13	17387	0.769231	1.57997e-09	1.36861e-07
GO:0007099	centriole replication	biological_process	cellular component organization or biogenesis	13	1334	23	17387	0.565217	1.66556e-09	1.40564e-07
GO:0016925	protein sumoylation	biological_process	cellular process	22	1334	66	17387	0.333333	1.69485e-09	1.40564e-07
GO:0006302	double-strand break repair	biological_process	cellular process	29	1334	109	17387	0.266055	1.91257e-09	1.55316e-07
GO:0031297	replication fork processing	biological_process	cellular process	16	1334	36	17387	0.444444	2.20993e-09	1.75802e-07
GO:0019058	viral life cycle	biological_process	multi-organism process	25	1334	87	17387	0.287356	4.42816e-09	3.4522e-07
GO:0007080	mitotic metaphase plate congression	biological_process	cellular component organization or biogenesis	17	1334	44	17387	0.386364	9.34153e-09	7.13986e-07
GO:0006298	mismatch repair	biological_process	cellular process	14	1334	30	17387	0.466667	1.03348e-08	7.74715e-07
GO:0006297	nucleotide-excision repair, DNA gap filling	biological_process	cellular process	12	1334	22	17387	0.545455	1.24246e-08	9.13793e-07
GO:0042273	ribosomal large subunit biogenesis	biological_process	cellular component organization or biogenesis	14	1334	31	17387	0.451613	1.75161e-08	1.2644e-06
GO:0051310	metaphase plate congression	biological_process	cellular process	9	1334	13	17387	0.692308	4.83593e-08	3.42736e-06
GO:0006261	DNA-dependent DNA replication	biological_process	cellular process	13	1334	29	17387	0.448276	6.38034e-08	4.44117e-06
GO:0042769	DNA damage response, detection of DNA damage	biological_process	cellular process	14	1334	34	17387	0.411765	7.38332e-08	4.95947e-06
GO:0006287	base-excision repair, gap-filling	biological_process	cellular process	15	1334	39	17387	0.384615	7.50664e-08	4.95947e-06
GO:0070317	negative regulation of G0 to G1 transition	biological_process	biological regulation	15	1334	39	17387	0.384615	7.50664e-08	4.95947e-06
GO:0006396	RNA processing	biological_process	metabolic process	26	1334	107	17387	0.242991	9.72522e-08	6.31815e-06
GO:0007098	centrosome cycle	biological_process	cellular component organization or biogenesis	16	1334	45	17387	0.355556	1.00782e-07	6.44012e-06
GO:0000083	regulation of transcription involved in G1/S transition of mitotic cell cycle	biological_process	biological regulation	13	1334	30	17387	0.433333	1.04691e-07	6.58203e-06
GO:0042276	error-prone translesion synthesis	biological_process	cellular process	10	1334	18	17387	0.555556	1.6902e-07	1.02944e-05
GO:0051298	centrosome duplication	biological_process	cellular component organization or biogenesis	10	1334	18	17387	0.555556	1.6902e-07	1.02944e-05
GO:0006296	nucleotide-excision repair, DNA incision, 5'-to lesion	biological_process	cellular process	13	1334	32	17387	0.40625	2.62556e-07	1.57453e-05
GO:0006275	regulation of DNA replication	biological_process	biological regulation	11	1334	23	17387	0.478261	2.96938e-07	1.75373e-05
GO:0008334	histone mRNA metabolic process	biological_process	cellular process	8	1334	12	17387	0.666667	4.40334e-07	2.56182e-05
GO:0007096	regulation of exit from mitosis	biological_process	biological regulation	13	1334	34	17387	0.382353	6.06521e-07	3.37746e-05
GO:0019985	translesion synthesis	biological_process	cellular process	13	1334	34	17387	0.382353	6.06521e-07	3.37746e-05
GO:0033683	nucleotide-excision repair, DNA incision	biological_process	cellular process	13	1334	34	17387	0.382353	6.06521e-07	3.37746e-05
GO:1901990	regulation of mitotic cell cycle phase transition	biological_process	biological regulation	21	1334	82	17387	0.256098	6.40929e-07	3.51879e-05
GO:0000079	regulation of cyclin-dependent protein serine/threonine kinase activity	biological_process	biological regulation	17	1334	57	17387	0.298246	7.28658e-07	3.94487e-05
GO:0090305	nucleic acid phosphodiester bond hydrolysis	biological_process	cellular process	28	1334	134	17387	0.208955	9.09783e-07	4.85799e-05
GO:0006405	RNA export from nucleus	biological_process	localization	17	1334	58	17387	0.293103	9.57635e-07	5.0444e-05
GO:0006268	DNA unwinding involved in DNA replication	biological_process	cellular component organization or biogenesis	9	1334	17	17387	0.529412	1.2387e-06	6.35322e-05
GO:0070987	error-free translesion synthesis	biological_process	metabolic process	9	1334	17	17387	0.529412	1.2387e-06	6.35322e-05
GO:0000055	ribosomal large subunit export from nucleus	biological_process	cellular component organization or biogenesis	6	1334	7	17387	0.857143	1.32055e-06	6.4604e-05
GO:0044806	G-quadruplex DNA unwinding	biological_process	cellular process	6	1334	7	17387	0.857143	1.32055e-06	6.4604e-05
GO:1902975	mitotic DNA replication initiation	biological_process	cellular process	6	1334	7	17387	0.857143	1.32055e-06	6.4604e-05
GO:0000082	G1/S transition of mitotic cell cycle	biological_process	cellular process	19	1334	72	17387	0.263889	1.32589e-06	6.4604e-05
GO:0000387	spliceosomal snRNP assembly	biological_process	cellular component organization or biogenesis	12	1334	31	17387	0.387097	1.41362e-06	6.80285e-05
GO:0006264	mitochondrial DNA replication	biological_process	cellular component organization or biogenesis	7	1334	10	17387	0.7	1.5045e-06	6.89944e-05
GO:0051292	nuclear pore complex assembly	biological_process	cellular component organization or biogenesis	7	1334	10	17387	0.7	1.5045e-06	6.89944e-05
GO:1900264	positive regulation of DNA-directed DNA polymerase activity	biological_process	biological regulation	7	1334	10	17387	0.7	1.5045e-06	6.89944e-05
GO:1904851	positive regulation of establishment of protein localization to telomere	biological_process	biological regulation	7	1334	10	17387	0.7	1.5045e-06	6.89944e-05
GO:0006303	double-strand break repair via nonhomologous end joining	biological_process	cellular process	19	1334	73	17387	0.260274	1.66472e-06	7.54544e-05
GO:0016070	RNA metabolic process	biological_process	cellular process	15	1334	48	17387	0.3125	1.68867e-06	7.56603e-05
GO:0000462	maturation of SSU-rRNA from tricistronic rRNA transcript (SSU-rRNA, 5.8S rRNA, LSU-rRNA)	biological_process	cellular process	11	1334	27	17387	0.407407	2.14822e-06	9.4426e-05
GO:0090307	mitotic spindle assembly	biological_process	cellular component organization or biogenesis	14	1334	43	17387	0.325581	2.15596e-06	9.4426e-05
GO:0006606	protein import into nucleus	biological_process	localization	22	1334	95	17387	0.231579	2.20771e-06	9.56182e-05
GO:0000463	maturation of LSU-rRNA from tricistronic rRNA transcript (SSU-rRNA, 5.8S rRNA, LSU-rRNA)	biological_process	cellular component organization or biogenesis	8	1334	14	17387	0.571429	2.32263e-06	9.94902e-05
GO:0006283	transcription-coupled nucleotide-excision repair	biological_process	cellular process	18	1334	69	17387	0.26087	3.00035e-06	0.000127123
GO:0051276	chromosome organization	biological_process	cellular component organization or biogenesis	11	1334	28	17387	0.392857	3.29332e-06	0.000138036
GO:0033314	mitotic DNA replication checkpoint	biological_process	biological regulation	7	1334	11	17387	0.636364	3.86186e-06	0.000156808
GO:0051315	attachment of mitotic spindle microtubules to kinetochore	biological_process	cellular component organization or biogenesis	7	1334	11	17387	0.636364	3.86186e-06	0.000156808
GO:1904871	positive regulation of protein localization to Cajal body	biological_process	biological regulation	7	1334	11	17387	0.636364	3.86186e-06	0.000156808
GO:0000056	ribosomal small subunit export from nucleus	biological_process	cellular component organization or biogenesis	6	1334	8	17387	0.75	4.93674e-06	0.000190595
GO:0006267	pre-replicative complex assembly involved in nuclear cell cycle DNA replication	biological_process	cellular component organization or biogenesis	6	1334	8	17387	0.75	4.93674e-06	0.000190595
GO:0006999	nuclear pore organization	biological_process	cellular component organization or biogenesis	6	1334	8	17387	0.75	4.93674e-06	0.000190595
GO:0007088	regulation of mitotic nuclear division	biological_process	biological regulation	10	1334	24	17387	0.416667	4.93847e-06	0.000190595
GO:0044772	mitotic cell cycle phase transition	biological_process	cellular process	10	1334	24	17387	0.416667	4.93847e-06	0.000190595
GO:0008033	tRNA processing	biological_process	cellular process	22	1334	100	17387	0.22	5.43216e-06	0.000207594
GO:0000375	RNA splicing, via transesterification reactions	biological_process	cellular process	10	1334	25	17387	0.4	7.66555e-06	0.0002901
GO:0051983	regulation of chromosome segregation	biological_process	biological regulation	7	1334	12	17387	0.583333	8.65201e-06	0.000309798
GO:0030490	maturation of SSU-rRNA	biological_process	cellular component organization or biogenesis	8	1334	16	17387	0.5	8.65698e-06	0.000309798
GO:0045190	isotype switching	biological_process	cellular process	8	1334	16	17387	0.5	8.65698e-06	0.000309798
GO:1904874	positive regulation of telomerase RNA localization to Cajal body	biological_process	biological regulation	8	1334	16	17387	0.5	8.65698e-06	0.000309798
GO:0006284	base-excision repair	biological_process	cellular process	12	1334	36	17387	0.333333	8.74238e-06	0.000309798
GO:0007131	reciprocal meiotic recombination	biological_process	cellular component organization or biogenesis	12	1334	36	17387	0.333333	8.74238e-06	0.000309798
GO:0032212	positive regulation of telomere maintenance via telomerase	biological_process	biological regulation	12	1334	36	17387	0.333333	8.74238e-06	0.000309798
GO:0000281	mitotic cytokinesis	biological_process	cellular process	15	1334	55	17387	0.272727	1.10243e-05	0.000387143
GO:0006164	purine nucleotide biosynthetic process	biological_process	cellular process	9	1334	21	17387	0.428571	1.12932e-05	0.000389565
GO:0051170	import into nucleus	biological_process	localization	9	1334	21	17387	0.428571	1.12932e-05	0.000389565
GO:0000467	exonucleolytic trimming to generate mature 3'-end of 5.8S rRNA from tricistronic rRNA transcript (SSU-rRNA, 5.8S rRNA, LSU-rRNA)	biological_process	cellular process	6	1334	9	17387	0.666667	1.3843e-05	0.000473335
GO:0006269	DNA replication, synthesis of RNA primer	biological_process	cellular process	5	1334	6	17387	0.833333	1.48322e-05	0.000490818
GO:0045132	meiotic chromosome segregation	biological_process	cellular component organization or biogenesis	5	1334	6	17387	0.833333	1.48322e-05	0.000490818
GO:0006361	transcription initiation from RNA polymerase I promoter	biological_process	cellular process	11	1334	32	17387	0.34375	1.4858e-05	0.000490818
GO:0006363	termination of RNA polymerase I transcription	biological_process	cellular process	11	1334	32	17387	0.34375	1.4858e-05	0.000490818
GO:0000245	spliceosomal complex assembly	biological_process	cellular component organization or biogenesis	10	1334	27	17387	0.37037	1.71625e-05	0.000562181
GO:0000729	DNA double-strand break processing	biological_process	cellular process	7	1334	13	17387	0.538462	1.75006e-05	0.00056378
GO:0000731	DNA synthesis involved in DNA repair	biological_process	cellular process	7	1334	13	17387	0.538462	1.75006e-05	0.00056378
GO:2000042	negative regulation of double-strand break repair via homologous recombination	biological_process	biological regulation	9	1334	22	17387	0.409091	1.78117e-05	0.000569099
GO:0051726	regulation of cell cycle	biological_process	biological regulation	43	1334	289	17387	0.148789	2.08134e-05	0.000659599
GO:0006457	protein folding	biological_process	cellular process	31	1334	182	17387	0.17033	2.12405e-05	0.000667704
GO:0045815	positive regulation of gene expression, epigenetic	biological_process	metabolic process	13	1334	45	17387	0.288889	2.15038e-05	0.000670576
GO:0007095	mitotic G2 DNA damage checkpoint	biological_process	biological regulation	12	1334	39	17387	0.307692	2.20109e-05	0.000680939
GO:0007064	mitotic sister chromatid cohesion	biological_process	cellular component organization or biogenesis	8	1334	18	17387	0.444444	2.56051e-05	0.000785895
GO:0007062	sister chromatid cohesion	biological_process	cellular component organization or biogenesis	9	1334	23	17387	0.391304	2.72735e-05	0.000830564
GO:0000076	DNA replication checkpoint	biological_process	biological regulation	6	1334	10	17387	0.6	3.23509e-05	0.000957753
GO:2000001	regulation of DNA damage checkpoint	biological_process	biological regulation	6	1334	10	17387	0.6	3.23509e-05	0.000957753
GO:2000234	positive regulation of rRNA processing	biological_process	biological regulation	6	1334	10	17387	0.6	3.23509e-05	0.000957753
GO:0007093	mitotic cell cycle checkpoint	biological_process	biological regulation	7	1334	14	17387	0.5	3.26786e-05	0.000957753
GO:0016446	somatic hypermutation of immunoglobulin genes	biological_process	developmental process	7	1334	14	17387	0.5	3.26786e-05	0.000957753
GO:0006272	leading strand elongation	biological_process	cellular process	4	1334	4	17387	1	3.4508e-05	0.00100382
GO:0006369	termination of RNA polymerase II transcription	biological_process	cellular process	11	1334	35	17387	0.314286	3.87739e-05	0.00111956
GO:0009116	nucleoside metabolic process	biological_process	cellular process	9	1334	24	17387	0.375	4.06746e-05	0.00116581
GO:0006189	'de novo' IMP biosynthetic process	biological_process	metabolic process	5	1334	7	17387	0.714286	4.86113e-05	0.00135348
GO:0010032	meiotic chromosome condensation	biological_process	cellular process	5	1334	7	17387	0.714286	4.86113e-05	0.00135348
GO:0010216	maintenance of DNA methylation	biological_process	cellular process	5	1334	7	17387	0.714286	4.86113e-05	0.00135348
GO:0051383	kinetochore organization	biological_process	cellular component organization or biogenesis	5	1334	7	17387	0.714286	4.86113e-05	0.00135348
GO:0019083	viral transcription	biological_process	multi-organism process	21	1334	108	17387	0.194444	6.27568e-05	0.00173493
GO:0032465	regulation of cytokinesis	biological_process	biological regulation	12	1334	43	17387	0.27907	6.4771e-05	0.00177801
GO:0007018	microtubule-based movement	biological_process	cellular process	18	1334	86	17387	0.209302	7.61506e-05	0.00207577
GO:0030488	tRNA methylation	biological_process	cellular process	11	1334	38	17387	0.289474	9.02834e-05	0.00244392
GO:0007004	telomere maintenance via telomerase	biological_process	biological regulation	10	1334	32	17387	0.3125	9.2074e-05	0.0024752
GO:0071897	DNA biosynthetic process	biological_process	cellular process	11	1334	39	17387	0.282051	0.000117105	0.00312654
GO:0000480	endonucleolytic cleavage in 5'-ETS of tricistronic rRNA transcript (SSU-rRNA, 5.8S rRNA, LSU-rRNA)	biological_process	cellular component organization or biogenesis	5	1334	8	17387	0.625	0.000121402	0.00313395
GO:0045143	homologous chromosome segregation	biological_process	cellular component organization or biogenesis	5	1334	8	17387	0.625	0.000121402	0.00313395
GO:0051256	mitotic spindle midzone assembly	biological_process	cellular component organization or biogenesis	5	1334	8	17387	0.625	0.000121402	0.00313395
GO:0051988	regulation of attachment of spindle microtubules to kinetochore	biological_process	biological regulation	5	1334	8	17387	0.625	0.000121402	0.00313395
GO:1902570	protein localization to nucleolus	biological_process	localization	5	1334	8	17387	0.625	0.000121402	0.00313395
GO:0006289	nucleotide-excision repair	biological_process	cellular process	12	1334	46	17387	0.26087	0.000132515	0.00339831
GO:0042274	ribosomal small subunit biogenesis	biological_process	cellular component organization or biogenesis	8	1334	22	17387	0.363636	0.000141722	0.00358721
GO:0048025	negative regulation of mRNA splicing, via spliceosome	biological_process	cellular process	8	1334	22	17387	0.363636	0.000141722	0.00358721
GO:1990830	cellular response to leukemia inhibitory factor	biological_process	cellular process	19	1334	98	17387	0.193878	0.000143686	0.00361346
GO:0008283	cell proliferation	biological_process	cell proliferation	27	1334	166	17387	0.162651	0.000157183	0.00390482
GO:0016447	somatic recombination of immunoglobulin gene segments	biological_process	immune system process	4	1334	5	17387	0.8	0.000161979	0.00390482
GO:0042148	strand invasion	biological_process	cellular process	4	1334	5	17387	0.8	0.000161979	0.00390482
GO:0046602	regulation of mitotic centrosome separation	biological_process	biological regulation	4	1334	5	17387	0.8	0.000161979	0.00390482
GO:0046952	ketone body catabolic process	biological_process	cellular process	4	1334	5	17387	0.8	0.000161979	0.00390482
GO:0090666	scaRNA localization to Cajal body	biological_process	localization	4	1334	5	17387	0.8	0.000161979	0.00390482
GO:0010332	response to gamma radiation	biological_process	response to stimulus	9	1334	28	17387	0.321429	0.000162283	0.00390482
GO:0051225	spindle assembly	biological_process	cellular component organization or biogenesis	13	1334	54	17387	0.240741	0.000170578	0.00407923
GO:0000077	DNA damage checkpoint	biological_process	cellular process	11	1334	41	17387	0.268293	0.000191462	0.00455071
GO:0031573	intra-S DNA damage checkpoint	biological_process	biological regulation	7	1334	18	17387	0.388889	0.000230441	0.005444
GO:0070192	chromosome organization involved in meiotic cell cycle	biological_process	cellular component organization or biogenesis	5	1334	9	17387	0.555556	0.000255851	0.00600788
GO:0007005	mitochondrion organization	biological_process	cellular component organization or biogenesis	19	1334	104	17387	0.182692	0.000321088	0.00749463
GO:0010569	regulation of double-strand break repair via homologous recombination	biological_process	biological regulation	7	1334	19	17387	0.368421	0.0003408	0.00790738
GO:0000460	maturation of 5.8S rRNA	biological_process	cellular component organization or biogenesis	6	1334	14	17387	0.428571	0.000353616	0.00792182
GO:0001833	inner cell mass cell proliferation	biological_process	cell proliferation	6	1334	14	17387	0.428571	0.000353616	0.00792182
GO:0010457	centriole-centriole cohesion	biological_process	cellular component organization or biogenesis	6	1334	14	17387	0.428571	0.000353616	0.00792182
GO:0031571	mitotic G1 DNA damage checkpoint	biological_process	biological regulation	6	1334	14	17387	0.428571	0.000353616	0.00792182
GO:0045943	positive regulation of transcription by RNA polymerase I	biological_process	biological regulation	6	1334	14	17387	0.428571	0.000353616	0.00792182
GO:0071168	protein localization to chromatin	biological_process	localization	6	1334	14	17387	0.428571	0.000353616	0.00792182
GO:0010972	negative regulation of G2/M transition of mitotic cell cycle	biological_process	biological regulation	13	1334	58	17387	0.224138	0.000364387	0.00811647
GO:0007076	mitotic chromosome condensation	biological_process	cellular component organization or biogenesis	11	1334	44	17387	0.25	0.000375543	0.00831742
GO:0000027	ribosomal large subunit assembly	biological_process	cellular process	8	1334	25	17387	0.32	0.000389479	0.00852916
GO:0048026	positive regulation of mRNA splicing, via spliceosome	biological_process	cellular process	8	1334	25	17387	0.32	0.000389479	0.00852916
GO:0000479	endonucleolytic cleavage of tricistronic rRNA transcript (SSU-rRNA, 5.8S rRNA, LSU-rRNA)	biological_process	cellular process	3	1334	3	17387	1	0.000450704	0.00936078
GO:0007057	spindle assembly involved in female meiosis I	biological_process	cellular component organization or biogenesis	3	1334	3	17387	1	0.000450704	0.00936078
GO:0018171	peptidyl-cysteine oxidation	biological_process	cellular process	3	1334	3	17387	1	0.000450704	0.00936078
GO:0031291	Ran protein signal transduction	biological_process	response to stimulus	3	1334	3	17387	1	0.000450704	0.00936078
GO:0035984	cellular response to trichostatin A	biological_process	cellular process	3	1334	3	17387	1	0.000450704	0.00936078
GO:0042790	nucleolar large rRNA transcription by RNA polymerase I	biological_process	cellular process	3	1334	3	17387	1	0.000450704	0.00936078
GO:0071932	replication fork reversal	biological_process	cellular process	3	1334	3	17387	1	0.000450704	0.00936078
GO:0044770	cell cycle phase transition	biological_process	cellular process	4	1334	6	17387	0.666667	0.000456272	0.00936078
GO:0071035	nuclear polyadenylation-dependent rRNA catabolic process	biological_process	cellular process	4	1334	6	17387	0.666667	0.000456272	0.00936078
GO:0071038	nuclear polyadenylation-dependent tRNA catabolic process	biological_process	cellular process	4	1334	6	17387	0.666667	0.000456272	0.00936078
GO:0072719	cellular response to cisplatin	biological_process	cellular process	4	1334	6	17387	0.666667	0.000456272	0.00936078
GO:1902751	positive regulation of cell cycle G2/M phase transition	biological_process	cellular process	4	1334	6	17387	0.666667	0.000456272	0.00936078
GO:0000447	endonucleolytic cleavage in ITS1 to separate SSU-rRNA from 5.8S rRNA and LSU-rRNA from tricistronic rRNA transcript (SSU-rRNA, 5.8S rRNA, LSU-rRNA)	biological_process	cellular component organization or biogenesis	5	1334	10	17387	0.5	0.000479352	0.00963152
GO:0006390	mitochondrial transcription	biological_process	cellular process	5	1334	10	17387	0.5	0.000479352	0.00963152
GO:0030071	regulation of mitotic metaphase/anaphase transition	biological_process	biological regulation	5	1334	10	17387	0.5	0.000479352	0.00963152
GO:0046599	regulation of centriole replication	biological_process	biological regulation	5	1334	10	17387	0.5	0.000479352	0.00963152
GO:0030261	chromosome condensation	biological_process	cellular component organization or biogenesis	9	1334	32	17387	0.28125	0.000498259	0.00996008
GO:0000470	maturation of LSU-rRNA	biological_process	cellular component organization or biogenesis	6	1334	15	17387	0.4	0.00055122	0.0109069
GO:1905168	positive regulation of double-strand break repair via homologous recombination	biological_process	biological regulation	6	1334	15	17387	0.4	0.00055122	0.0109069
GO:0031124	mRNA 3'-end processing	biological_process	cellular process	13	1334	61	17387	0.213115	0.000611449	0.0120375
GO:0043928	exonucleolytic nuclear-transcribed mRNA catabolic process involved in deadenylation-dependent decay	biological_process	negative regulation of biological process	9	1334	33	17387	0.272727	0.00063895	0.0125157
GO:0010165	response to X-ray	biological_process	response to stimulus	7	1334	21	17387	0.333333	0.000686324	0.0133764
GO:0007129	synapsis	biological_process	cellular component organization or biogenesis	9	1334	34	17387	0.264706	0.000810482	0.0156399
GO:0045739	positive regulation of DNA repair	biological_process	biological regulation	9	1334	34	17387	0.264706	0.000810482	0.0156399
GO:0008608	attachment of spindle microtubules to kinetochore	biological_process	cellular process	5	1334	11	17387	0.454545	0.000823364	0.0157633
GO:0007019	microtubule depolymerization	biological_process	cellular component organization or biogenesis	6	1334	16	17387	0.375	0.000824966	0.0157633
GO:0043488	regulation of mRNA stability	biological_process	cellular process	19	1334	112	17387	0.169643	0.000835023	0.0158777
GO:0010971	positive regulation of G2/M transition of mitotic cell cycle	biological_process	biological regulation	8	1334	28	17387	0.285714	0.000910019	0.0172197
GO:0006977	DNA damage response, signal transduction by p53 class mediator resulting in cell cycle arrest	biological_process	cellular process	12	1334	56	17387	0.214286	0.000931208	0.0175355
GO:0010824	regulation of centrosome duplication	biological_process	biological regulation	7	1334	22	17387	0.318182	0.000940472	0.0176248
GO:0006166	purine ribonucleoside salvage	biological_process	cellular process	4	1334	7	17387	0.571429	0.00099982	0.0182357
GO:0017196	N-terminal peptidyl-methionine acetylation	biological_process	cellular process	4	1334	7	17387	0.571429	0.00099982	0.0182357
GO:0034502	protein localization to chromosome	biological_process	localization	4	1334	7	17387	0.571429	0.00099982	0.0182357
GO:0043504	mitochondrial DNA repair	biological_process	cellular component organization or biogenesis	4	1334	7	17387	0.571429	0.00099982	0.0182357
GO:0090267	positive regulation of mitotic cell cycle spindle assembly checkpoint	biological_process	biological regulation	4	1334	7	17387	0.571429	0.00099982	0.0182357
GO:0008630	intrinsic apoptotic signaling pathway in response to DNA damage	biological_process	biological regulation	11	1334	49	17387	0.22449	0.00100114	0.0182357
GO:0051973	positive regulation of telomerase activity	biological_process	biological regulation	9	1334	35	17387	0.257143	0.00101767	0.0184505
GO:0032259	methylation	biological_process	metabolic process	29	1334	206	17387	0.140777	0.00107897	0.0194715
GO:0009168	purine ribonucleoside monophosphate biosynthetic process	biological_process	cellular process	6	1334	17	17387	0.352941	0.0011927	0.0213264
GO:1903827	regulation of cellular protein localization	biological_process	biological regulation	6	1334	17	17387	0.352941	0.0011927	0.0213264
GO:0006400	tRNA modification	biological_process	cellular process	9	1334	36	17387	0.25	0.00126573	0.0225288
GO:0006360	transcription by RNA polymerase I	biological_process	cellular process	5	1334	12	17387	0.416667	0.00132261	0.0233281
GO:0072711	cellular response to hydroxyurea	biological_process	response to stimulus	5	1334	12	17387	0.416667	0.00132261	0.0233281
GO:0016579	protein deubiquitination	biological_process	cellular process	33	1334	249	17387	0.13253	0.00145512	0.0255498
GO:1902036	regulation of hematopoietic stem cell differentiation	biological_process	biological regulation	13	1334	67	17387	0.19403	0.0015382	0.0268875
GO:0043967	histone H4 acetylation	biological_process	cellular component organization or biogenesis	9	1334	37	17387	0.243243	0.00156031	0.0271522
GO:0001933	negative regulation of protein phosphorylation	biological_process	biological regulation	15	1334	84	17387	0.178571	0.00167688	0.028307
GO:0006521	regulation of cellular amino acid metabolic process	biological_process	biological regulation	11	1334	52	17387	0.211538	0.00167921	0.028307
GO:0007079	mitotic chromosome movement towards spindle pole	biological_process	cellular component organization or biogenesis	3	1334	4	17387	0.75	0.00169929	0.028307
GO:0032487	regulation of Rap protein signal transduction	biological_process	biological regulation	3	1334	4	17387	0.75	0.00169929	0.028307
GO:0036124	histone H3-K9 trimethylation	biological_process	cellular component organization or biogenesis	3	1334	4	17387	0.75	0.00169929	0.028307
GO:0043137	DNA replication, removal of RNA primer	biological_process	cellular process	3	1334	4	17387	0.75	0.00169929	0.028307
GO:0045003	double-strand break repair via synthesis-dependent strand annealing	biological_process	cellular process	3	1334	4	17387	0.75	0.00169929	0.028307
GO:0045876	positive regulation of sister chromatid cohesion	biological_process	biological regulation	3	1334	4	17387	0.75	0.00169929	0.028307
GO:0051754	meiotic sister chromatid cohesion, centromeric	biological_process	cellular component organization or biogenesis	3	1334	4	17387	0.75	0.00169929	0.028307
GO:0071042	nuclear polyadenylation-dependent mRNA catabolic process	biological_process	biological regulation	3	1334	4	17387	0.75	0.00169929	0.028307
GO:0014029	neural crest formation	biological_process	cellular process	4	1334	8	17387	0.5	0.00187824	0.0308919
GO:0031442	positive regulation of mRNA 3'-end processing	biological_process	biological regulation	4	1334	8	17387	0.5	0.00187824	0.0308919
GO:0034475	U4 snRNA 3'-end processing	biological_process	cellular process	4	1334	8	17387	0.5	0.00187824	0.0308919
GO:0000722	telomere maintenance via recombination	biological_process	cellular component organization or biogenesis	5	1334	13	17387	0.384615	0.00201419	0.0327138
GO:0016572	histone phosphorylation	biological_process	cellular component organization or biogenesis	5	1334	13	17387	0.384615	0.00201419	0.0327138
GO:0090656	t-circle formation	biological_process	biological regulation	5	1334	13	17387	0.384615	0.00201419	0.0327138
GO:0006401	RNA catabolic process	biological_process	metabolic process	7	1334	25	17387	0.28	0.00216313	0.0349871
GO:0006418	tRNA aminoacylation for protein translation	biological_process	cellular process	10	1334	46	17387	0.217391	0.00217252	0.0349938
GO:0000712	resolution of meiotic recombination intermediates	biological_process	cellular component organization or biogenesis	6	1334	19	17387	0.315789	0.00228908	0.0367195
GO:0010212	response to ionizing radiation	biological_process	response to stimulus	11	1334	54	17387	0.203704	0.00231114	0.0367741
GO:0006325	chromatin organization	biological_process	cellular component organization or biogenesis	42	1334	348	17387	0.12069	0.00231135	0.0367741
GO:0000132	establishment of mitotic spindle orientation	biological_process	cellular component organization or biogenesis	8	1334	32	17387	0.25	0.00233965	0.037073
