# Supplementary material for: Transcriptome research of human amniocytes identifies hub genes associated with developmental dysplasia in down syndrome
Source: Aging (Albany NY). 2023 Dec 12;15(23):14086–108. doi: 10.18632/aging.205291 (PMC10756088; doi:10.18632/aging.205291)
Supplement: Supplementary Table 5 [file aging-15-205291-s005.xlsx]

## Sheet: Trisomy
Supplementary Table 5. Enriched transcription factor (TF) binding motifs in Normal and Trisomy group.
NAME	msigdb_c3_tft_tft_legacy_term_desc	Original size	Size (after restricting to dataset)	ES	NES	NOM p-val	FDR q-val	RANK AT MAX	LEADING EDGE
VDR_Q3	Genes having at least one occurence of the transcription factor binding site V$VDR_Q3 (v7.4 TRANSFAC) in the regions spanning up to 4 kb around their transcription starting sites.	228	170	0.556303	2.33688	0	0	2179	tags=32%, list=17%, signal=38%
ZIC3_01	Genes having at least one occurence of the transcription factor binding site V$ZIC3_01 (v7.4 TRANSFAC) in the regions spanning up to 4 kb around their transcription starting sites.	254	194	0.483529	2.09898	0	0	2711	tags=38%, list=21%, signal=47%
SREBP1_Q6	Genes having at least one occurence of the transcription factor binding site V$SREBP1_Q6 (v7.4 TRANSFAC) in the regions spanning up to 4 kb around their transcription starting sites.	244	189	0.485388	2.07282	0	0	1932	tags=27%, list=15%, signal=31%
TFIII_Q6	Genes having at least one occurence of the transcription factor binding site V$TFIII_Q6 (v7.4 TRANSFAC) in the regions spanning up to 4 kb around their transcription starting sites.	206	156	0.490188	2.05246	0	0	2382	tags=37%, list=18%, signal=44%
NFKB_Q6	Genes having at least one occurence of the transcription factor binding site V$NFKB_Q6 (v7.4 TRANSFAC) in the regions spanning up to 4 kb around their transcription starting sites.	255	210	0.472094	2.03735	0	0.00044386	2136	tags=30%, list=16%, signal=35%
AP4_Q6	Genes having at least one occurence of the transcription factor binding site V$AP4_Q6 (v7.4 TRANSFAC) in the regions spanning up to 4 kb around their transcription starting sites.	218	156	0.477072	2.03232	0	0.000369883	2722	tags=39%, list=21%, signal=49%
SP1_Q2_01	Genes having at least one occurence of the transcription factor binding site V$SP1_Q2_01 (v7.4 TRANSFAC) in the regions spanning up to 4 kb around their transcription starting sites.	248	205	0.466954	2.02523	0	0.000317043	3151	tags=39%, list=24%, signal=51%
MAZR_01	Genes having at least one occurence of the transcription factor binding site V$MAZR_01 (v7.4 TRANSFAC) in the regions spanning up to 4 kb around their transcription starting sites.	222	176	0.478305	2.02513	0	0.000277412	2724	tags=39%, list=21%, signal=49%
CHX10_01	Genes having at least one occurence of the transcription factor binding site V$CHX10_01 (v7.4 TRANSFAC) in the regions spanning up to 4 kb around their transcription starting sites.	220	139	0.491294	2.02487	0	0.000246589	2026	tags=35%, list=16%, signal=40%
LHX3_01	Genes having at least one occurence of the transcription factor binding site V$LHX3_01 (v7.4 TRANSFAC) in the regions spanning up to 4 kb around their transcription starting sites.	226	137	0.491293	2.02079	0	0.00022193	2920	tags=42%, list=22%, signal=53%
TGGNNNNNNKCCAR_UNKNOWN	Genes having at least one occurence of the highly conserved motif M27 TGGNNNNNNKCCAR in the region spanning up to 4 kb around their transcription start sites. The motif does not match any known transcription factor binding site (v7.4 TRANSFAC).	425	315	0.443419	2.01918	0	0.000201754	2986	tags=39%, list=23%, signal=49%
CACCCBINDINGFACTOR_Q6	Genes having at least one occurence of the transcription factor binding site V$CACCCBINDINGFACTOR_Q6 (v7.4 TRANSFAC) in the regions spanning up to 4 kb around their transcription starting sites.	270	207	0.472588	2.00902	0	0.000184942	2953	tags=39%, list=23%, signal=49%
RTTTNNNYTGGM_UNKNOWN	Genes having at least one occurence of the highly conserved motif M107 RTTTNNNYTGGM in the region spanning up to 4 kb around their transcription start sites. The motif does not match any known transcription factor binding site (v7.4 TRANSFAC).	154	115	0.498666	2.00775	0	0.000170715	2183	tags=32%, list=17%, signal=38%
MZF1_01	Genes having at least one occurence of the transcription factor binding site V$MZF1_01 (v7.4 TRANSFAC) in the regions spanning up to 4 kb around their transcription starting sites.	236	195	0.473067	2.00745	0	0.000158521	2385	tags=33%, list=18%, signal=40%
SP3_Q3	Genes having at least one occurence of the transcription factor binding site V$SP3_Q3 (v7.4 TRANSFAC) in the regions spanning up to 4 kb around their transcription starting sites.	247	201	0.459049	2.00227	0	0.000147953	2443	tags=30%, list=19%, signal=37%
FOXO1_02	Genes having at least one occurence of the transcription factor binding site V$FOXO1_02 (v7.4 TRANSFAC) in the regions spanning up to 4 kb around their transcription starting sites.	249	196	0.464016	1.99791	0	0.000255404	2130	tags=28%, list=16%, signal=32%
AP1_C	Genes having at least one occurence of the transcription factor binding site V$AP1_C (v7.4 TRANSFAC) in the regions spanning up to 4 kb around their transcription starting sites.	272	205	0.466508	1.99208	0	0.00024038	1139	tags=23%, list=9%, signal=25%
CP2_01	Genes having at least one occurence of the transcription factor binding site V$CP2_01 (v7.4 TRANSFAC) in the regions spanning up to 4 kb around their transcription starting sites.	258	202	0.464887	1.9878	0	0.000227025	2217	tags=32%, list=17%, signal=38%
CACBINDINGPROTEIN_Q6	Genes having at least one occurence of the transcription factor binding site V$CACBINDINGPROTEIN_Q6 (v7.4 TRANSFAC) in the regions spanning up to 4 kb around their transcription starting sites.	244	196	0.460688	1.98403	0	0.000215077	2987	tags=40%, list=23%, signal=51%
WGGAATGY_TEF1_Q6	Genes having at least one occurence of the highly conserved motif M79 WGGAATGY sites. The motif matches transcription factor binding site V$TEF1_Q6 (v7.4 TRANSFAC).	376	292	0.436632	1.97595	0	0.000303929	2953	tags=37%, list=23%, signal=46%
ARGGGTTAA_UNKNOWN	Genes having at least one occurence of the highly conserved motif M65 ARGGGTTAA in the region spanning up to 4 kb around their transcription start sites. The motif does not match any known transcription factor binding site (v7.4 TRANSFAC).	121	92	0.51081	1.97561	0	0.000289456	2219	tags=36%, list=17%, signal=43%
FOXO4_02	Genes having at least one occurence of the transcription factor binding site V$FOXO4_02 (v7.4 TRANSFAC) in the regions spanning up to 4 kb around their transcription starting sites.	262	203	0.45777	1.97084	0	0.000276299	2043	tags=31%, list=16%, signal=36%
OCT_C	Genes having at least one occurence of the transcription factor binding site V$OCT_C (v7.4 TRANSFAC) in the regions spanning up to 4 kb around their transcription starting sites.	258	174	0.466803	1.96604	0	0.000264286	3059	tags=43%, list=23%, signal=55%
HNF6_Q6	Genes having at least one occurence of the transcription factor binding site V$HNF6_Q6 (v7.4 TRANSFAC) in the regions spanning up to 4 kb around their transcription starting sites.	237	173	0.462676	1.95245	0	0.000253274	2022	tags=31%, list=16%, signal=36%
OCT_Q6	Genes having at least one occurence of the transcription factor binding site V$OCT_Q6 (v7.4 TRANSFAC) in the regions spanning up to 4 kb around their transcription starting sites.	260	177	0.462538	1.94741	0	0.000323461	3059	tags=43%, list=23%, signal=55%
HEN1_01	Genes having at least one occurence of the transcription factor binding site V$HEN1_01 (v7.4 TRANSFAC) in the regions spanning up to 4 kb around their transcription starting sites.	200	145	0.467275	1.94515	0	0.000388248	2369	tags=33%, list=18%, signal=40%
SMAD3_Q6	Genes having at least one occurence of the transcription factor binding site V$SMAD3_Q6 (v7.4 TRANSFAC) in the regions spanning up to 4 kb around their transcription starting sites.	240	168	0.461124	1.94275	0	0.000373869	2349	tags=35%, list=18%, signal=42%
VDR_Q6	Genes having at least one occurence of the transcription factor binding site V$VDR_Q6 (v7.4 TRANSFAC) in the regions spanning up to 4 kb around their transcription starting sites.	271	201	0.447806	1.93272	0	0.000434277	2855	tags=34%, list=22%, signal=43%
GATA_C	Genes having at least one occurence of the transcription factor binding site V$GATA_C (v7.4 TRANSFAC) in the regions spanning up to 4 kb around their transcription starting sites.	265	170	0.454907	1.92866	0	0.000419302	2183	tags=31%, list=17%, signal=37%
AP2GAMMA_01	Genes having at least one occurence of the transcription factor binding site V$AP2GAMMA_01 (v7.4 TRANSFAC) in the regions spanning up to 4 kb around their transcription starting sites.	251	207	0.446685	1.92704	0	0.000405325	2625	tags=33%, list=20%, signal=41%
IRF_Q6	Genes having at least one occurence of the transcription factor binding site V$IRF_Q6 (v7.4 TRANSFAC) in the regions spanning up to 4 kb around their transcription starting sites.	241	186	0.446549	1.91942	0	0.00052523	2719	tags=34%, list=21%, signal=42%
CCCNNGGGAR_OLF1_01	Genes having at least one occurence of the highly conserved motif M130 CCCNNGGGAR sites. The motif matches transcription factor binding site V$OLF1_01 (v7.4 TRANSFAC).	323	243	0.436234	1.91339	0	0.000508816	2780	tags=34%, list=21%, signal=42%
OCT1_Q5_01	Genes having at least one occurence of the transcription factor binding site V$OCT1_Q5_01 (v7.4 TRANSFAC) in the regions spanning up to 4 kb around their transcription starting sites.	269	178	0.449392	1.90899	0	0.000558369	3059	tags=42%, list=23%, signal=54%
OLF1_01	Genes having at least one occurence of the transcription factor binding site V$OLF1_01 (v7.4 TRANSFAC) in the regions spanning up to 4 kb around their transcription starting sites.	273	198	0.440978	1.90136	0	0.000541947	1507	tags=23%, list=12%, signal=26%
TAAYNRNNTCC_UNKNOWN	Genes having at least one occurence of the highly conserved motif M136 TAAYNRNNTCC in the region spanning up to 4 kb around their transcription start sites. The motif does not match any known transcription factor binding site (v7.4 TRANSFAC).	170	116	0.474951	1.89798	0	0.000526462	1713	tags=29%, list=13%, signal=33%
GATA1_04	Genes having at least one occurence of the transcription factor binding site V$GATA1_04 (v7.4 TRANSFAC) in the regions spanning up to 4 kb around their transcription starting sites.	241	148	0.454408	1.89576	0	0.000511838	2227	tags=32%, list=17%, signal=38%
MYOGENIN_Q6	Genes having at least one occurence of the transcription factor binding site V$MYOGENIN_Q6 (v7.4 TRANSFAC) in the regions spanning up to 4 kb around their transcription starting sites.	255	187	0.437117	1.89574	0	0.000498005	2533	tags=36%, list=19%, signal=44%
AP1FJ_Q2	Genes having at least one occurence of the transcription factor binding site V$AP1FJ_Q2 (v7.4 TRANSFAC) in the regions spanning up to 4 kb around their transcription starting sites.	267	209	0.437905	1.89527	0	0.0004849	1997	tags=26%, list=15%, signal=30%
IK3_01	Genes having at least one occurence of the transcription factor binding site V$IK3_01 (v7.4 TRANSFAC) in the regions spanning up to 4 kb around their transcription starting sites.	226	167	0.448665	1.89016	0	0.000584074	2227	tags=30%, list=17%, signal=36%
GCCNNNWTAAR_UNKNOWN	Genes having at least one occurence of the highly conserved motif M95 GCCNNNWTAAR in the region spanning up to 4 kb around their transcription start sites. The motif does not match any known transcription factor binding site (v7.4 TRANSFAC).	150	117	0.476666	1.88961	0	0.000569472	2908	tags=42%, list=22%, signal=53%
GGARNTKYCCA_UNKNOWN	Genes having at least one occurence of the highly conserved motif M163 GGARNTKYCCA in the region spanning up to 4 kb around their transcription start sites. The motif does not match any known transcription factor binding site (v7.4 TRANSFAC).	79	57	0.535846	1.8849	0	0.000555583	1615	tags=30%, list=12%, signal=34%
LYF1_01	Genes having at least one occurence of the transcription factor binding site V$LYF1_01 (v7.4 TRANSFAC) in the regions spanning up to 4 kb around their transcription starting sites.	267	195	0.436548	1.88459	0	0.000542355	2761	tags=35%, list=21%, signal=44%
AP1_Q2_01	Genes having at least one occurence of the transcription factor binding site V$AP1_Q2_01 (v7.4 TRANSFAC) in the regions spanning up to 4 kb around their transcription starting sites.	271	202	0.435533	1.88199	0	0.000574828	2375	tags=30%, list=18%, signal=36%
CP2_02	Genes having at least one occurence of the transcription factor binding site V$CP2_02 (v7.4 TRANSFAC) in the regions spanning up to 4 kb around their transcription starting sites.	250	194	0.441655	1.8748	0	0.000561763	2935	tags=36%, list=23%, signal=46%
NFKB_Q6_01	Genes having at least one occurence of the transcription factor binding site V$NFKB_Q6_01 (v7.4 TRANSFAC) in the regions spanning up to 4 kb around their transcription starting sites.	236	183	0.441355	1.8719	0	0.000599034	2757	tags=34%, list=21%, signal=42%
ZIC2_01	Genes having at least one occurence of the transcription factor binding site V$ZIC2_01 (v7.4 TRANSFAC) in the regions spanning up to 4 kb around their transcription starting sites.	251	198	0.433209	1.86629	0	0.000678898	2628	tags=32%, list=20%, signal=39%
YTAAYNGCT_UNKNOWN	Genes having at least one occurence of the highly conserved motif M168 YTAAYNGCT in the region spanning up to 4 kb around their transcription start sites. The motif does not match any known transcription factor binding site (v7.4 TRANSFAC).	153	107	0.474106	1.86176	0	0.000750649	2372	tags=35%, list=18%, signal=42%
RP58_01	Genes having at least one occurence of the transcription factor binding site V$RP58_01 (v7.4 TRANSFAC) in the regions spanning up to 4 kb around their transcription starting sites.	207	134	0.449903	1.85033	0	0.000912385	2282	tags=31%, list=18%, signal=37%
NFKAPPAB_01	Genes having at least one occurence of the transcription factor binding site V$NFKAPPAB_01 (v7.4 TRANSFAC) in the regions spanning up to 4 kb around their transcription starting sites.	253	192	0.436751	1.8467	0	0.000893765	2627	tags=33%, list=20%, signal=41%
ARP1_01	Genes having at least one occurence of the transcription factor binding site V$ARP1_01 (v7.4 TRANSFAC) in the regions spanning up to 4 kb around their transcription starting sites.	162	108	0.4671	1.84444	0	0.000957588	2210	tags=29%, list=17%, signal=34%
AP1_Q4_01	Genes having at least one occurence of the transcription factor binding site V$AP1_Q4_01 (v7.4 TRANSFAC) in the regions spanning up to 4 kb around their transcription starting sites.	261	200	0.427363	1.84044	0	0.000978027	922	tags=18%, list=7%, signal=19%
NKX62_Q2	Genes having at least one occurence of the transcription factor binding site V$NKX62_Q2 (v7.4 TRANSFAC) in the regions spanning up to 4 kb around their transcription starting sites.	236	163	0.437401	1.83449	0	0.000959219	3130	tags=40%, list=24%, signal=52%
LFA1_Q6	Genes having at least one occurence of the transcription factor binding site V$LFA1_Q6 (v7.4 TRANSFAC) in the regions spanning up to 4 kb around their transcription starting sites.	251	177	0.433735	1.83406	0	0.00094112	2968	tags=38%, list=23%, signal=49%
GATAAGR_GATA_C	Genes having at least one occurence of the highly conserved motif M131 GATAAGR sites. The motif matches transcription factor binding site V$GATA_C (v7.4 TRANSFAC).	295	184	0.427853	1.8287	0	0.00103971	3071	tags=41%, list=24%, signal=53%
FOXO1_01	Genes having at least one occurence of the transcription factor binding site V$FOXO1_01 (v7.4 TRANSFAC) in the regions spanning up to 4 kb around their transcription starting sites.	247	180	0.432291	1.82646	0	0.0010208	2300	tags=32%, list=18%, signal=38%
HNF4_Q6	Genes having at least one occurence of the transcription factor binding site V$HNF4_Q6 (v7.4 TRANSFAC) in the regions spanning up to 4 kb around their transcription starting sites.	267	200	0.417623	1.81391	0	0.0011879	2204	tags=29%, list=17%, signal=34%
FXR_Q3	Genes having at least one occurence of the transcription factor binding site V$FXR_Q3 (v7.4 TRANSFAC) in the regions spanning up to 4 kb around their transcription starting sites.	111	70	0.488189	1.81282	0	0.00116706	2710	tags=43%, list=21%, signal=54%
MAF_Q6	Genes having at least one occurence of the transcription factor binding site V$MAF_Q6 (v7.4 TRANSFAC) in the regions spanning up to 4 kb around their transcription starting sites.	260	204	0.422396	1.81274	0	0.00114694	2146	tags=25%, list=16%, signal=30%
FREAC4_01	Genes having at least one occurence of the transcription factor binding site V$FREAC4_01 (v7.4 TRANSFAC) in the regions spanning up to 4 kb around their transcription starting sites.	152	105	0.451402	1.80622	0	0.00127164	2266	tags=31%, list=17%, signal=38%
LMO2COM_02	Genes having at least one occurence of the transcription factor binding site V$LMO2COM_02 (v7.4 TRANSFAC) in the regions spanning up to 4 kb around their transcription starting sites.	238	166	0.429067	1.80493	0	0.00125044	2917	tags=39%, list=22%, signal=49%
YATGNWAAT_OCT_C	Genes having at least one occurence of the highly conserved motif M44 YATGNWAAT sites. The motif matches transcription factor binding site V$OCT_C (v7.4 TRANSFAC).	357	243	0.413171	1.80228	0	0.00130066	2391	tags=32%, list=18%, signal=38%
E2A_Q2	Genes having at least one occurence of the transcription factor binding site V$E2A_Q2 (v7.4 TRANSFAC) in the regions spanning up to 4 kb around their transcription starting sites.	248	172	0.422818	1.79548	0	0.0013505	2514	tags=31%, list=19%, signal=38%
E12_Q6	Genes having at least one occurence of the transcription factor binding site V$E12_Q6 (v7.4 TRANSFAC) in the regions spanning up to 4 kb around their transcription starting sites.	261	191	0.424249	1.79445	0	0.00132906	3128	tags=38%, list=24%, signal=50%
OCT1_01	Genes having at least one occurence of the transcription factor binding site V$OCT1_01 (v7.4 TRANSFAC) in the regions spanning up to 4 kb around their transcription starting sites.	261	179	0.419523	1.79432	0	0.0013407	3059	tags=39%, list=23%, signal=50%
TTF1_Q6	Genes having at least one occurence of the transcription factor binding site V$TTF1_Q6 (v7.4 TRANSFAC) in the regions spanning up to 4 kb around their transcription starting sites.	261	194	0.422324	1.79417	0	0.00132007	2935	tags=34%, list=23%, signal=43%
GATA_Q6	Genes having at least one occurence of the transcription factor binding site V$GATA_Q6 (v7.4 TRANSFAC) in the regions spanning up to 4 kb around their transcription starting sites.	198	120	0.44568	1.79326	0	0.00130007	3048	tags=43%, list=23%, signal=55%
ZIC1_01	Genes having at least one occurence of the transcription factor binding site V$ZIC1_01 (v7.4 TRANSFAC) in the regions spanning up to 4 kb around their transcription starting sites.	260	202	0.416703	1.7931	0	0.00128067	2144	tags=27%, list=16%, signal=32%
STAT3_02	Genes having at least one occurence of the transcription factor binding site V$STAT3_02 (v7.4 TRANSFAC) in the regions spanning up to 4 kb around their transcription starting sites.	147	115	0.446007	1.79211	0	0.00126184	3117	tags=37%, list=24%, signal=48%
HOXA4_Q2	Genes having at least one occurence of the transcription factor binding site V$HOXA4_Q2 (v7.4 TRANSFAC) in the regions spanning up to 4 kb around their transcription starting sites.	266	181	0.413498	1.78906	0	0.00130333	1213	tags=20%, list=9%, signal=22%
E47_02	Genes having at least one occurence of the transcription factor binding site V$E47_02 (v7.4 TRANSFAC) in the regions spanning up to 4 kb around their transcription starting sites.	251	179	0.41863	1.78787	0	0.00134637	3136	tags=40%, list=24%, signal=52%
PBX1_01	Genes having at least one occurence of the transcription factor binding site V$PBX1_01 (v7.4 TRANSFAC) in the regions spanning up to 4 kb around their transcription starting sites.	258	179	0.41712	1.7872	0	0.00132741	2026	tags=30%, list=16%, signal=35%
RGTTAMWNATT_HNF1_01	Genes having at least one occurence of the highly conserved motif M84 RGTTAMWNATT sites. The motif matches transcription factor binding site V$HNF1_01 (v7.4 TRANSFAC).	72	48	0.528453	1.78101	0.00218818	0.00145262	1245	tags=31%, list=10%, signal=34%
HNF4_DR1_Q3	Genes having at least one occurence of the transcription factor binding site V$HNF4_DR1_Q3 (v7.4 TRANSFAC) in the regions spanning up to 4 kb around their transcription starting sites.	263	205	0.413306	1.78078	0	0.00146312	2625	tags=31%, list=20%, signal=38%
NFKB_C	Genes having at least one occurence of the transcription factor binding site V$NFKB_C (v7.4 TRANSFAC) in the regions spanning up to 4 kb around their transcription starting sites.	265	202	0.41465	1.78051	0	0.00144335	3753	tags=46%, list=29%, signal=63%
FAC1_01	Genes having at least one occurence of the transcription factor binding site V$FAC1_01 (v7.4 TRANSFAC) in the regions spanning up to 4 kb around their transcription starting sites.	219	168	0.422938	1.78001	0	0.00147881	3256	tags=43%, list=25%, signal=56%
CAGNYGKNAAA_UNKNOWN	Genes having at least one occurence of the highly conserved motif M160 CAGNYGKNAAA in the region spanning up to 4 kb around their transcription start sites. The motif does not match any known transcription factor binding site (v7.4 TRANSFAC).	77	57	0.503578	1.77694	0.00440529	0.00154015	2801	tags=39%, list=21%, signal=49%
DR4_Q2	Genes having at least one occurence of the transcription factor binding site V$DR4_Q2 (v7.4 TRANSFAC) in the regions spanning up to 4 kb around their transcription starting sites.	260	200	0.411357	1.77646	0	0.00154654	2625	tags=32%, list=20%, signal=39%
EN1_01	Genes having at least one occurence of the transcription factor binding site V$EN1_01 (v7.4 TRANSFAC) in the regions spanning up to 4 kb around their transcription starting sites.	110	83	0.461927	1.77504	0.00238663	0.00155396	1899	tags=25%, list=15%, signal=29%
AML_Q6	Genes having at least one occurence of the transcription factor binding site V$AML_Q6 (v7.4 TRANSFAC) in the regions spanning up to 4 kb around their transcription starting sites.	264	180	0.422412	1.77306	0	0.00160919	3073	tags=41%, list=24%, signal=53%
FOXO4_01	Genes having at least one occurence of the transcription factor binding site V$FOXO4_01 (v7.4 TRANSFAC) in the regions spanning up to 4 kb around their transcription starting sites.	243	184	0.41223	1.76612	0	0.00169823	3846	tags=44%, list=29%, signal=62%
PAX8_B	Genes having at least one occurence of the transcription factor binding site V$PAX8_B (v7.4 TRANSFAC) in the regions spanning up to 4 kb around their transcription starting sites.	105	74	0.471291	1.76534	0	0.00170176	1615	tags=24%, list=12%, signal=28%
SRY_02	Genes having at least one occurence of the transcription factor binding site V$SRY_02 (v7.4 TRANSFAC) in the regions spanning up to 4 kb around their transcription starting sites.	254	188	0.415519	1.76513	0	0.00168101	2749	tags=34%, list=21%, signal=43%
TTTNNANAGCYR_UNKNOWN	Genes having at least one occurence of the highly conserved motif M169 TTTNNANAGCYR in the region spanning up to 4 kb around their transcription start sites. The motif does not match any known transcription factor binding site (v7.4 TRANSFAC).	133	68	0.482264	1.76032	0	0.00173461	1615	tags=21%, list=12%, signal=23%
NFKAPPAB65_01	Genes having at least one occurence of the transcription factor binding site V$NFKAPPAB65_01 (v7.4 TRANSFAC) in the regions spanning up to 4 kb around their transcription starting sites.	239	174	0.418992	1.7598	0	0.00171396	3748	tags=45%, list=29%, signal=62%
GTTRYCATRR_UNKNOWN	Genes having at least one occurence of the highly conserved motif M37 GTTRYCATRR in the region spanning up to 4 kb around their transcription start sites. The motif does not match any known transcription factor binding site (v7.4 TRANSFAC).	173	115	0.436715	1.75793	0	0.00176578	3891	tags=50%, list=30%, signal=70%
PAX4_03	Genes having at least one occurence of the transcription factor binding site V$PAX4_03 (v7.4 TRANSFAC) in the regions spanning up to 4 kb around their transcription starting sites.	254	196	0.404738	1.75046	0	0.0018929	2722	tags=31%, list=21%, signal=39%
OCT1_Q6	Genes having at least one occurence of the transcription factor binding site V$OCT1_Q6 (v7.4 TRANSFAC) in the regions spanning up to 4 kb around their transcription starting sites.	264	184	0.412286	1.75001	0	0.0018946	2386	tags=32%, list=18%, signal=38%
GATA1_05	Genes having at least one occurence of the transcription factor binding site V$GATA1_05 (v7.4 TRANSFAC) in the regions spanning up to 4 kb around their transcription starting sites.	279	186	0.410447	1.74635	0	0.0019899	1999	tags=30%, list=15%, signal=34%
GFI1_01	Genes having at least one occurence of the transcription factor binding site V$GFI1_01 (v7.4 TRANSFAC) in the regions spanning up to 4 kb around their transcription starting sites.	262	188	0.409967	1.74574	0	0.00196754	2625	tags=32%, list=20%, signal=40%
P53_DECAMER_Q2	Genes having at least one occurence of the transcription factor binding site V$P53_DECAMER_Q2 (v7.4 TRANSFAC) in the regions spanning up to 4 kb around their transcription starting sites.	251	187	0.40583	1.74149	0	0.00201651	2865	tags=33%, list=22%, signal=42%
NF1_Q6_01	Genes having at least one occurence of the transcription factor binding site V$NF1_Q6_01 (v7.4 TRANSFAC) in the regions spanning up to 4 kb around their transcription starting sites.	267	186	0.404465	1.73969	0	0.00206245	2710	tags=33%, list=21%, signal=41%
AREB6_03	Genes having at least one occurence of the transcription factor binding site V$AREB6_03 (v7.4 TRANSFAC) in the regions spanning up to 4 kb around their transcription starting sites.	261	197	0.404387	1.73783	0	0.00208818	3055	tags=39%, list=23%, signal=50%
EVI1_05	Genes having at least one occurence of the transcription factor binding site V$EVI1_05 (v7.4 TRANSFAC) in the regions spanning up to 4 kb around their transcription starting sites.	172	112	0.43595	1.73515	0	0.00208595	3020	tags=37%, list=23%, signal=47%
STAT5A_03	Genes having at least one occurence of the transcription factor binding site V$STAT5A_03 (v7.4 TRANSFAC) in the regions spanning up to 4 kb around their transcription starting sites.	265	202	0.405224	1.73427	0	0.00208676	2887	tags=34%, list=22%, signal=43%
AP1_Q6	Genes having at least one occurence of the transcription factor binding site V$AP1_Q6 (v7.4 TRANSFAC) in the regions spanning up to 4 kb around their transcription starting sites.	254	200	0.409186	1.73397	0	0.00208727	2372	tags=28%, list=18%, signal=34%
OCT1_B	Genes having at least one occurence of the transcription factor binding site V$OCT1_B (v7.4 TRANSFAC) in the regions spanning up to 4 kb around their transcription starting sites.	263	169	0.415972	1.73083	0	0.00217485	3059	tags=42%, list=23%, signal=54%
SP1_01	Genes having at least one occurence of the transcription factor binding site V$SP1_01 (v7.4 TRANSFAC) in the regions spanning up to 4 kb around their transcription starting sites.	237	196	0.403841	1.73075	0	0.00215243	3497	tags=40%, list=27%, signal=54%
CDP_01	Genes having at least one occurence of the transcription factor binding site V$CDP_01 (v7.4 TRANSFAC) in the regions spanning up to 4 kb around their transcription starting sites.	88	56	0.494095	1.72397	0.0021692	0.00236406	882	tags=21%, list=7%, signal=23%
TEF1_Q6	Genes having at least one occurence of the transcription factor binding site V$TEF1_Q6 (v7.4 TRANSFAC) in the regions spanning up to 4 kb around their transcription starting sites.	224	179	0.403216	1.72326	0	0.00236341	2518	tags=30%, list=19%, signal=37%
T3R_Q6	Genes having at least one occurence of the transcription factor binding site V$T3R_Q6 (v7.4 TRANSFAC) in the regions spanning up to 4 kb around their transcription starting sites.	253	171	0.412075	1.72306	0	0.00236078	2082	tags=27%, list=16%, signal=32%
SRF_Q6	Genes having at least one occurence of the transcription factor binding site V$SRF_Q6 (v7.4 TRANSFAC) in the regions spanning up to 4 kb around their transcription starting sites.	246	188	0.401586	1.7209	0	0.00237907	3407	tags=40%, list=26%, signal=53%
LMO2COM_01	Genes having at least one occurence of the transcription factor binding site V$LMO2COM_01 (v7.4 TRANSFAC) in the regions spanning up to 4 kb around their transcription starting sites.	262	190	0.403187	1.71632	0	0.00239801	3657	tags=43%, list=28%, signal=58%
PAX4_04	Genes having at least one occurence of the transcription factor binding site V$PAX4_04 (v7.4 TRANSFAC) in the regions spanning up to 4 kb around their transcription starting sites.	220	169	0.403775	1.70927	0	0.00264173	2599	tags=30%, list=20%, signal=37%
SP1_Q6_01	Genes having at least one occurence of the transcription factor binding site V$SP1_Q6_01 (v7.4 TRANSFAC) in the regions spanning up to 4 kb around their transcription starting sites.	246	218	0.396799	1.70902	0	0.00263677	3071	tags=36%, list=24%, signal=46%
PU1_Q6	Genes having at least one occurence of the transcription factor binding site V$PU1_Q6 (v7.4 TRANSFAC) in the regions spanning up to 4 kb around their transcription starting sites.	232	174	0.405689	1.70697	0	0.00270836	1920	tags=25%, list=15%, signal=29%
SRY_01	Genes having at least one occurence of the transcription factor binding site V$SRY_01 (v7.4 TRANSFAC) in the regions spanning up to 4 kb around their transcription starting sites.	224	177	0.401619	1.70339	0	0.0027434	2081	tags=27%, list=16%, signal=31%
TGASTMAGC_NFE2_01	Genes having at least one occurence of the highly conserved motif M32 TGASTMAGC sites. The motif matches transcription factor binding site V$NFE2_01 (v7.4 TRANSFAC).	189	147	0.412138	1.70179	0	0.00281419	1139	tags=18%, list=9%, signal=20%
TFIIA_Q6	Genes having at least one occurence of the transcription factor binding site V$TFIIA_Q6 (v7.4 TRANSFAC) in the regions spanning up to 4 kb around their transcription starting sites.	254	193	0.394749	1.70114	0	0.00278813	2844	tags=35%, list=22%, signal=44%
OCT1_05	Genes having at least one occurence of the transcription factor binding site V$OCT1_05 (v7.4 TRANSFAC) in the regions spanning up to 4 kb around their transcription starting sites.	244	171	0.397071	1.70045	0	0.00276255	2855	tags=36%, list=22%, signal=45%
AP1_Q2	Genes having at least one occurence of the transcription factor binding site V$AP1_Q2 (v7.4 TRANSFAC) in the regions spanning up to 4 kb around their transcription starting sites.	261	196	0.39285	1.69688	0	0.00288692	1224	tags=20%, list=9%, signal=22%
MYOGNF1_01	Genes having at least one occurence of the transcription factor binding site V$MYOGNF1_01 (v7.4 TRANSFAC) in the regions spanning up to 4 kb around their transcription starting sites.	47	35	0.530623	1.69232	0.00680272	0.0030336	3331	tags=49%, list=26%, signal=65%
AP2ALPHA_01	Genes having at least one occurence of the transcription factor binding site V$AP2ALPHA_01 (v7.4 TRANSFAC) in the regions spanning up to 4 kb around their transcription starting sites.	242	203	0.391773	1.69171	0	0.00302496	2286	tags=28%, list=18%, signal=34%
PAX2_02	Genes having at least one occurence of the transcription factor binding site V$PAX2_02 (v7.4 TRANSFAC) in the regions spanning up to 4 kb around their transcription starting sites.	261	194	0.396066	1.68926	0	0.00314494	2893	tags=35%, list=22%, signal=44%
CRX_Q4	Genes having at least one occurence of the transcription factor binding site V$CRX_Q4 (v7.4 TRANSFAC) in the regions spanning up to 4 kb around their transcription starting sites.	271	179	0.397985	1.68892	0	0.00315381	2619	tags=34%, list=20%, signal=42%
SPZ1_01	Genes having at least one occurence of the transcription factor binding site V$SPZ1_01 (v7.4 TRANSFAC) in the regions spanning up to 4 kb around their transcription starting sites.	233	188	0.395392	1.68835	0	0.00314527	3201	tags=38%, list=25%, signal=50%
AREB6_02	Genes having at least one occurence of the transcription factor binding site V$AREB6_02 (v7.4 TRANSFAC) in the regions spanning up to 4 kb around their transcription starting sites.	256	185	0.392391	1.68727	0	0.00320811	2749	tags=35%, list=21%, signal=43%
AAANWWTGC_UNKNOWN	Genes having at least one occurence of the highly conserved motif M144 AAANWWTGC in the region spanning up to 4 kb around their transcription start sites. The motif does not match any known transcription factor binding site (v7.4 TRANSFAC).	194	145	0.410975	1.68506	0	0.00323693	3138	tags=39%, list=24%, signal=50%
HOX13_01	Genes having at least one occurence of the transcription factor binding site V$HOX13_01 (v7.4 TRANSFAC) in the regions spanning up to 4 kb around their transcription starting sites.	44	33	0.531041	1.68485	0.0107296	0.0032095	2578	tags=42%, list=20%, signal=53%
WTTGKCTG_UNKNOWN	Genes having at least one occurence of the highly conserved motif M46 WTTGKCTG in the region spanning up to 4 kb around their transcription start sites. The motif does not match any known transcription factor binding site (v7.4 TRANSFAC).	512	384	0.364761	1.68428	0	0.00321715	2626	tags=30%, list=20%, signal=37%
AP4_Q5	Genes having at least one occurence of the transcription factor binding site V$AP4_Q5 (v7.4 TRANSFAC) in the regions spanning up to 4 kb around their transcription starting sites.	263	200	0.38744	1.68387	0	0.00322585	2654	tags=36%, list=20%, signal=45%
HEN1_02	Genes having at least one occurence of the transcription factor binding site V$HEN1_02 (v7.4 TRANSFAC) in the regions spanning up to 4 kb around their transcription starting sites.	197	154	0.403789	1.68147	0	0.00328895	2272	tags=28%, list=17%, signal=33%
CIZ_01	Genes having at least one occurence of the transcription factor binding site V$CIZ_01 (v7.4 TRANSFAC) in the regions spanning up to 4 kb around their transcription starting sites.	242	182	0.392968	1.67754	0	0.00336183	3156	tags=34%, list=24%, signal=44%
TGCTGAY_UNKNOWN	Genes having at least one occurence of the highly conserved motif M92 TGCTGAY in the region spanning up to 4 kb around their transcription start sites. The motif does not match any known transcription factor binding site (v7.4 TRANSFAC).	536	398	0.362237	1.6775	0	0.0033345	2619	tags=30%, list=20%, signal=36%
PXR_Q2	Genes having at least one occurence of the transcription factor binding site V$PXR_Q2 (v7.4 TRANSFAC) in the regions spanning up to 4 kb around their transcription starting sites.	258	193	0.393359	1.67695	0	0.00332419	2336	tags=28%, list=18%, signal=34%
GATA1_03	Genes having at least one occurence of the transcription factor binding site V$GATA1_03 (v7.4 TRANSFAC) in the regions spanning up to 4 kb around their transcription starting sites.	242	171	0.396161	1.67538	0	0.00336371	2682	tags=34%, list=21%, signal=42%
FREAC3_01	Genes having at least one occurence of the transcription factor binding site V$FREAC3_01 (v7.4 TRANSFAC) in the regions spanning up to 4 kb around their transcription starting sites.	254	187	0.395537	1.67176	0.00243902	0.00341794	2693	tags=31%, list=21%, signal=39%
NF1_Q6	Genes having at least one occurence of the transcription factor binding site V$NF1_Q6 (v7.4 TRANSFAC) in the regions spanning up to 4 kb around their transcription starting sites.	263	187	0.392906	1.67097	0	0.00344099	2617	tags=34%, list=20%, signal=42%
GGATTA_PITX2_Q2	Genes having at least one occurence of the highly conserved motif M93 GGATTA sites. The motif matches transcription factor binding site V$PITX2_Q2 (v7.4 TRANSFAC).	579	393	0.365013	1.66994	0	0.00346228	3043	tags=33%, list=23%, signal=42%
DR3_Q4	Genes having at least one occurence of the transcription factor binding site V$DR3_Q4 (v7.4 TRANSFAC) in the regions spanning up to 4 kb around their transcription starting sites.	144	110	0.419232	1.6675	0	0.00356881	2757	tags=36%, list=21%, signal=46%
AR_Q2	Genes having at least one occurence of the transcription factor binding site V$AR_Q2 (v7.4 TRANSFAC) in the regions spanning up to 4 kb around their transcription starting sites.	124	87	0.436429	1.66553	0.002331	0.00367008	2889	tags=31%, list=22%, signal=40%
CREL_01	Genes having at least one occurence of the transcription factor binding site V$CREL_01 (v7.4 TRANSFAC) in the regions spanning up to 4 kb around their transcription starting sites.	255	184	0.389634	1.66131	0	0.00389588	3753	tags=45%, list=29%, signal=62%
PAX4_01	Genes having at least one occurence of the transcription factor binding site V$PAX4_01 (v7.4 TRANSFAC) in the regions spanning up to 4 kb around their transcription starting sites.	263	216	0.377869	1.65488	0	0.00405124	2953	tags=33%, list=23%, signal=42%
YRCCAKNNGNCGC_UNKNOWN	Genes having at least one occurence of the highly conserved motif M156 YRCCAKNNGNCGC in the region spanning up to 4 kb around their transcription start sites. The motif does not match any known transcription factor binding site (v7.4 TRANSFAC).	66	51	0.482214	1.65468	0	0.00402078	1871	tags=25%, list=14%, signal=30%
PITX2_Q2	Genes having at least one occurence of the transcription factor binding site V$PITX2_Q2 (v7.4 TRANSFAC) in the regions spanning up to 4 kb around their transcription starting sites.	256	177	0.387184	1.65433	0	0.004006	2557	tags=33%, list=20%, signal=41%
HMGIY_Q6	Genes having at least one occurence of the transcription factor binding site V$HMGIY_Q6 (v7.4 TRANSFAC) in the regions spanning up to 4 kb around their transcription starting sites.	246	165	0.389934	1.65264	0	0.00413088	1615	tags=21%, list=12%, signal=24%
MYOD_Q6_01	Genes having at least one occurence of the transcription factor binding site V$MYOD_Q6_01 (v7.4 TRANSFAC) in the regions spanning up to 4 kb around their transcription starting sites.	253	189	0.385883	1.65259	0	0.00410051	2646	tags=30%, list=20%, signal=37%
LXR_Q3	Genes having at least one occurence of the transcription factor binding site V$LXR_Q3 (v7.4 TRANSFAC) in the regions spanning up to 4 kb around their transcription starting sites.	80	62	0.46145	1.65189	0	0.00413094	1779	tags=24%, list=14%, signal=28%
RYTAAWNNNTGAY_UNKNOWN	Genes having at least one occurence of the highly conserved motif M133 RYTAAWNNNTGAY in the region spanning up to 4 kb around their transcription start sites. The motif does not match any known transcription factor binding site (v7.4 TRANSFAC).	63	35	0.513548	1.64905	0.0043956	0.00416019	1167	tags=29%, list=9%, signal=31%
AP1_Q6_01	Genes having at least one occurence of the transcription factor binding site V$AP1_Q6_01 (v7.4 TRANSFAC) in the regions spanning up to 4 kb around their transcription starting sites.	263	197	0.380652	1.64795	0	0.0041595	1847	tags=24%, list=14%, signal=27%
ETS2_B	Genes having at least one occurence of the transcription factor binding site V$ETS2_B (v7.4 TRANSFAC) in the regions spanning up to 4 kb around their transcription starting sites.	276	220	0.380158	1.64458	0	0.00427874	2379	tags=28%, list=18%, signal=34%
OCT1_04	Genes having at least one occurence of the transcription factor binding site V$OCT1_04 (v7.4 TRANSFAC) in the regions spanning up to 4 kb around their transcription starting sites.	231	161	0.392697	1.63669	0	0.00458546	3031	tags=37%, list=23%, signal=48%
ACCTGTTG_UNKNOWN	Genes having at least one occurence of the highly conserved motif M57 ACCTGTTG in the region spanning up to 4 kb around their transcription start sites. The motif does not match any known transcription factor binding site (v7.4 TRANSFAC).	157	118	0.410438	1.63624	0	0.00455317	2050	tags=24%, list=16%, signal=28%
RSRFC4_01	Genes having at least one occurence of the transcription factor binding site V$RSRFC4_01 (v7.4 TRANSFAC) in the regions spanning up to 4 kb around their transcription starting sites.	246	164	0.388006	1.63583	0	0.00458046	2266	tags=28%, list=17%, signal=34%
TAL1ALPHAE47_01	Genes having at least one occurence of the transcription factor binding site V$TAL1ALPHAE47_01 (v7.4 TRANSFAC) in the regions spanning up to 4 kb around their transcription starting sites.	252	175	0.389342	1.63398	0	0.00467702	2855	tags=31%, list=22%, signal=40%
RREB1_01	Genes having at least one occurence of the transcription factor binding site V$RREB1_01 (v7.4 TRANSFAC) in the regions spanning up to 4 kb around their transcription starting sites.	208	161	0.387955	1.63395	0	0.00464477	2015	tags=23%, list=15%, signal=27%
TAL1BETAE47_01	Genes having at least one occurence of the transcription factor binding site V$TAL1BETAE47_01 (v7.4 TRANSFAC) in the regions spanning up to 4 kb around their transcription starting sites.	248	160	0.394117	1.62871	0.00238663	0.00492992	3018	tags=38%, list=23%, signal=49%
P300_01	Genes having at least one occurence of the transcription factor binding site V$P300_01 (v7.4 TRANSFAC) in the regions spanning up to 4 kb around their transcription starting sites.	253	203	0.38074	1.62765	0	0.00491091	3244	tags=32%, list=25%, signal=41%
BACH2_01	Genes having at least one occurence of the transcription factor binding site V$BACH2_01 (v7.4 TRANSFAC) in the regions spanning up to 4 kb around their transcription starting sites.	266	210	0.37365	1.62209	0	0.00503308	3169	tags=36%, list=24%, signal=47%
SRF_Q5_01	Genes having at least one occurence of the transcription factor binding site V$SRF_Q5_01 (v7.4 TRANSFAC) in the regions spanning up to 4 kb around their transcription starting sites.	223	176	0.382557	1.61763	0	0.00527712	2953	tags=34%, list=23%, signal=43%
RACCACAR_AML_Q6	Genes having at least one occurence of the highly conserved motif M111 RACCACAR sites. The motif matches transcription factor binding site V$AML_Q6 (v7.4 TRANSFAC).	262	187	0.378034	1.61634	0	0.00532546	3099	tags=39%, list=24%, signal=50%
ATF6_01	Genes having at least one occurence of the transcription factor binding site V$ATF6_01 (v7.4 TRANSFAC) in the regions spanning up to 4 kb around their transcription starting sites.	126	100	0.416034	1.61631	0.00223214	0.00529019	3661	tags=42%, list=28%, signal=58%
SMAD4_Q6	Genes having at least one occurence of the transcription factor binding site V$SMAD4_Q6 (v7.4 TRANSFAC) in the regions spanning up to 4 kb around their transcription starting sites.	239	191	0.371886	1.60941	0	0.00563412	2372	tags=27%, list=18%, signal=33%
LBP1_Q6	Genes having at least one occurence of the transcription factor binding site V$LBP1_Q6 (v7.4 TRANSFAC) in the regions spanning up to 4 kb around their transcription starting sites.	217	152	0.38442	1.60908	0	0.00561096	2651	tags=36%, list=20%, signal=45%
ELF1_Q6	Genes having at least one occurence of the transcription factor binding site V$ELF1_Q6 (v7.4 TRANSFAC) in the regions spanning up to 4 kb around their transcription starting sites.	246	193	0.372601	1.60904	0	0.00558851	2895	tags=32%, list=22%, signal=40%
LEF1_Q6	Genes having at least one occurence of the transcription factor binding site V$LEF1_Q6 (v7.4 TRANSFAC) in the regions spanning up to 4 kb around their transcription starting sites.	261	192	0.378427	1.60838	0	0.00559202	3233	tags=40%, list=25%, signal=52%
PR_Q2	Genes having at least one occurence of the transcription factor binding site V$PR_Q2 (v7.4 TRANSFAC) in the regions spanning up to 4 kb around their transcription starting sites.	263	175	0.376928	1.60304	0	0.0059222	2979	tags=33%, list=23%, signal=42%
P53_02	Genes having at least one occurence of the transcription factor binding site V$P53_02 (v7.4 TRANSFAC) in the regions spanning up to 4 kb around their transcription starting sites.	252	193	0.374147	1.60234	0	0.00592272	3020	tags=35%, list=23%, signal=45%
FOXJ2_02	Genes having at least one occurence of the transcription factor binding site V$FOXJ2_02 (v7.4 TRANSFAC) in the regions spanning up to 4 kb around their transcription starting sites.	237	175	0.375733	1.60205	0	0.00591185	2229	tags=26%, list=17%, signal=31%
CDPCR3HD_01	Genes having at least one occurence of the transcription factor binding site V$CDPCR3HD_01 (v7.4 TRANSFAC) in the regions spanning up to 4 kb around their transcription starting sites.	236	169	0.380438	1.60125	0	0.00590081	1738	tags=22%, list=13%, signal=25%
HNF3B_01	Genes having at least one occurence of the transcription factor binding site V$HNF3B_01 (v7.4 TRANSFAC) in the regions spanning up to 4 kb around their transcription starting sites.	216	141	0.390035	1.60109	0	0.00587614	2367	tags=32%, list=18%, signal=39%
EVI1_04	Genes having at least one occurence of the transcription factor binding site V$EVI1_04 (v7.4 TRANSFAC) in the regions spanning up to 4 kb around their transcription starting sites.	235	162	0.386233	1.60016	0	0.00590361	2646	tags=30%, list=20%, signal=37%
CCANNAGRKGGC_UNKNOWN	Genes having at least one occurence of the highly conserved motif M45 CCANNAGRKGGC in the region spanning up to 4 kb around their transcription start sites. The motif does not match any known transcription factor binding site (v7.4 TRANSFAC).	115	80	0.421648	1.59843	0	0.00602183	2590	tags=35%, list=20%, signal=43%
CDPCR1_01	Genes having at least one occurence of the transcription factor binding site V$CDPCR1_01 (v7.4 TRANSFAC) in the regions spanning up to 4 kb around their transcription starting sites.	126	88	0.420998	1.59721	0.00235849	0.00605073	2143	tags=30%, list=16%, signal=35%
SRF_C	Genes having at least one occurence of the transcription factor binding site V$SRF_C (v7.4 TRANSFAC) in the regions spanning up to 4 kb around their transcription starting sites.	213	168	0.378411	1.59413	0	0.0062015	3249	tags=39%, list=25%, signal=51%
SREBP_Q3	Genes having at least one occurence of the transcription factor binding site V$SREBP_Q3 (v7.4 TRANSFAC) in the regions spanning up to 4 kb around their transcription starting sites.	255	183	0.372578	1.59196	0	0.00627483	3161	tags=39%, list=24%, signal=50%
STAT5A_01	Genes having at least one occurence of the transcription factor binding site V$STAT5A_01 (v7.4 TRANSFAC) in the regions spanning up to 4 kb around their transcription starting sites.	256	184	0.378465	1.5919	0	0.00625011	2369	tags=30%, list=18%, signal=36%
HNF1_Q6	Genes having at least one occurence of the transcription factor binding site V$HNF1_Q6 (v7.4 TRANSFAC) in the regions spanning up to 4 kb around their transcription starting sites.	251	167	0.375842	1.59149	0	0.00626377	2399	tags=31%, list=18%, signal=37%
GGGNNTTTCC_NFKB_Q6_01	Genes having at least one occurence of the highly conserved motif M86 GGGNNTTTCC sites. The motif matches transcription factor binding site V$NFKB_Q6_01 (v7.4 TRANSFAC).	133	103	0.407647	1.58912	0	0.00638536	3748	tags=47%, list=29%, signal=65%
HTF_01	Genes having at least one occurence of the transcription factor binding site V$HTF_01 (v7.4 TRANSFAC) in the regions spanning up to 4 kb around their transcription starting sites.	71	60	0.438803	1.58836	0.00441501	0.00640868	1213	tags=20%, list=9%, signal=22%
SOX5_01	Genes having at least one occurence of the transcription factor binding site V$SOX5_01 (v7.4 TRANSFAC) in the regions spanning up to 4 kb around their transcription starting sites.	261	212	0.364448	1.58788	0.00246914	0.0064438	2990	tags=35%, list=23%, signal=45%
NFAT_Q6	Genes having at least one occurence of the transcription factor binding site V$NFAT_Q6 (v7.4 TRANSFAC) in the regions spanning up to 4 kb around their transcription starting sites.	244	182	0.375291	1.58707	0	0.00646705	3120	tags=35%, list=24%, signal=46%
TAL1BETAITF2_01	Genes having at least one occurence of the transcription factor binding site V$TAL1BETAITF2_01 (v7.4 TRANSFAC) in the regions spanning up to 4 kb around their transcription starting sites.	257	175	0.37092	1.58636	0	0.0064897	3451	tags=39%, list=26%, signal=53%
ISRE_01	Genes having at least one occurence of the transcription factor binding site V$ISRE_01 (v7.4 TRANSFAC) in the regions spanning up to 4 kb around their transcription starting sites.	251	193	0.365504	1.58443	0	0.00657279	2695	tags=34%, list=21%, signal=42%
YATTNATC_UNKNOWN	Genes having at least one occurence of the highly conserved motif M97 YATTNATC in the region spanning up to 4 kb around their transcription start sites. The motif does not match any known transcription factor binding site (v7.4 TRANSFAC).	372	235	0.363763	1.58411	0	0.00655731	2653	tags=30%, list=20%, signal=37%
STAT5B_01	Genes having at least one occurence of the transcription factor binding site V$STAT5B_01 (v7.4 TRANSFAC) in the regions spanning up to 4 kb around their transcription starting sites.	251	177	0.376133	1.58313	0.00235294	0.00657855	2506	tags=31%, list=19%, signal=38%
AP4_01	Genes having at least one occurence of the transcription factor binding site V$AP4_01 (v7.4 TRANSFAC) in the regions spanning up to 4 kb around their transcription starting sites.	264	194	0.365235	1.57862	0	0.00688549	3855	tags=47%, list=30%, signal=66%
COUP_01	Genes having at least one occurence of the transcription factor binding site V$COUP_01 (v7.4 TRANSFAC) in the regions spanning up to 4 kb around their transcription starting sites.	263	198	0.366592	1.57834	0.00253807	0.00688151	2043	tags=24%, list=16%, signal=28%
CDC5_01	Genes having at least one occurence of the transcription factor binding site V$CDC5_01 (v7.4 TRANSFAC) in the regions spanning up to 4 kb around their transcription starting sites.	259	185	0.372019	1.57436	0	0.00718636	1385	tags=19%, list=11%, signal=21%
STTTCRNTTT_IRF_Q6	Genes having at least one occurence of the highly conserved motif M85 STTTCRNTTT sites. The motif matches transcription factor binding site V$IRF_Q6 (v7.4 TRANSFAC).	189	149	0.37781	1.57279	0	0.00730888	3323	tags=41%, list=25%, signal=54%
AMEF2_Q6	Genes having at least one occurence of the transcription factor binding site V$AMEF2_Q6 (v7.4 TRANSFAC) in the regions spanning up to 4 kb around their transcription starting sites.	256	180	0.374475	1.57098	0	0.00740711	3071	tags=36%, list=24%, signal=47%
OSF2_Q6	Genes having at least one occurence of the transcription factor binding site V$OSF2_Q6 (v7.4 TRANSFAC) in the regions spanning up to 4 kb around their transcription starting sites.	266	195	0.364253	1.57078	0	0.00739989	3099	tags=38%, list=24%, signal=49%
HEB_Q6	Genes having at least one occurence of the transcription factor binding site V$HEB_Q6 (v7.4 TRANSFAC) in the regions spanning up to 4 kb around their transcription starting sites.	262	176	0.368146	1.57045	0	0.00738277	3433	tags=45%, list=26%, signal=60%
FREAC2_01	Genes having at least one occurence of the transcription factor binding site V$FREAC2_01 (v7.4 TRANSFAC) in the regions spanning up to 4 kb around their transcription starting sites.	256	191	0.366549	1.56796	0.00238095	0.00748985	3673	tags=40%, list=28%, signal=55%
STAT4_01	Genes having at least one occurence of the transcription factor binding site V$STAT4_01 (v7.4 TRANSFAC) in the regions spanning up to 4 kb around their transcription starting sites.	264	187	0.371058	1.56796	0	0.00744914	2588	tags=29%, list=20%, signal=36%
TGTYNNNNNRGCARM_UNKNOWN	Genes having at least one occurence of the highly conserved motif M117 TGTYNNNNNRGCARM in the region spanning up to 4 kb around their transcription start sites. The motif does not match any known transcription factor binding site (v7.4 TRANSFAC).	87	62	0.43891	1.5673	0.010395	0.00747607	3625	tags=50%, list=28%, signal=69%
CHOP_01	Genes having at least one occurence of the transcription factor binding site V$CHOP_01 (v7.4 TRANSFAC) in the regions spanning up to 4 kb around their transcription starting sites.	236	181	0.36862	1.56693	0.00252525	0.00743587	1937	tags=23%, list=15%, signal=27%
MYOD_01	Genes having at least one occurence of the transcription factor binding site V$MYOD_01 (v7.4 TRANSFAC) in the regions spanning up to 4 kb around their transcription starting sites.	261	189	0.367894	1.5667	0	0.00741909	2341	tags=28%, list=18%, signal=33%
CATTGTYY_SOX9_B1	Genes having at least one occurence of the highly conserved motif M49 CATTGTYY sites. The motif matches transcription factor binding site V$SOX9_B1 (v7.4 TRANSFAC).	362	293	0.345933	1.56322	0	0.0075702	2825	tags=30%, list=22%, signal=37%
SRF_Q4	Genes having at least one occurence of the transcription factor binding site V$SRF_Q4 (v7.4 TRANSFAC) in the regions spanning up to 4 kb around their transcription starting sites.	228	176	0.36858	1.56304	0	0.00755228	3407	tags=38%, list=26%, signal=50%
ATF4_Q2	Genes having at least one occurence of the transcription factor binding site V$ATF4_Q2 (v7.4 TRANSFAC) in the regions spanning up to 4 kb around their transcription starting sites.	256	212	0.361324	1.55977	0	0.00776207	1459	tags=18%, list=11%, signal=20%
RGAGGAARY_PU1_Q6	Genes having at least one occurence of the highly conserved motif M50 RGAGGAARY sites. The motif matches transcription factor binding site V$PU1_Q6 (v7.4 TRANSFAC).	507	380	0.33913	1.55829	0	0.00779908	2937	tags=31%, list=23%, signal=38%
GATA2_01	Genes having at least one occurence of the transcription factor binding site V$GATA2_01 (v7.4 TRANSFAC) in the regions spanning up to 4 kb around their transcription starting sites.	105	87	0.407167	1.5569	0.0042735	0.00786835	2352	tags=24%, list=18%, signal=29%
MTF1_Q4	Genes having at least one occurence of the transcription factor binding site V$MTF1_Q4 (v7.4 TRANSFAC) in the regions spanning up to 4 kb around their transcription starting sites.	253	197	0.36777	1.55675	0	0.00787261	2087	tags=24%, list=16%, signal=28%
TEF_Q6	Genes having at least one occurence of the transcription factor binding site V$TEF_Q6 (v7.4 TRANSFAC) in the regions spanning up to 4 kb around their transcription starting sites.	260	195	0.361668	1.55573	0	0.00786397	2870	tags=35%, list=22%, signal=45%
IK2_01	Genes having at least one occurence of the transcription factor binding site V$IK2_01 (v7.4 TRANSFAC) in the regions spanning up to 4 kb around their transcription starting sites.	270	210	0.356636	1.55258	0.00238095	0.00816335	3128	tags=36%, list=24%, signal=46%
EGR_Q6	Genes having at least one occurence of the transcription factor binding site V$EGR_Q6 (v7.4 TRANSFAC) in the regions spanning up to 4 kb around their transcription starting sites.	276	225	0.35533	1.55173	0	0.00819712	2613	tags=28%, list=20%, signal=34%
AP1_Q4	Genes having at least one occurence of the transcription factor binding site V$AP1_Q4 (v7.4 TRANSFAC) in the regions spanning up to 4 kb around their transcription starting sites.	267	211	0.356963	1.55104	0	0.0081891	1224	tags=18%, list=9%, signal=19%
HNF4_01	Genes having at least one occurence of the transcription factor binding site V$HNF4_01 (v7.4 TRANSFAC) in the regions spanning up to 4 kb around their transcription starting sites.	272	202	0.355486	1.54991	0	0.00819217	1892	tags=21%, list=15%, signal=25%
GATA6_01	Genes having at least one occurence of the transcription factor binding site V$GATA6_01 (v7.4 TRANSFAC) in the regions spanning up to 4 kb around their transcription starting sites.	263	171	0.368483	1.54743	0	0.00830871	2625	tags=35%, list=20%, signal=43%
MZF1_02	Genes having at least one occurence of the transcription factor binding site V$MZF1_02 (v7.4 TRANSFAC) in the regions spanning up to 4 kb around their transcription starting sites.	234	192	0.363234	1.54728	0	0.00827762	3156	tags=34%, list=24%, signal=44%
EVI1_03	Genes having at least one occurence of the transcription factor binding site V$EVI1_03 (v7.4 TRANSFAC) in the regions spanning up to 4 kb around their transcription starting sites.	58	33	0.483829	1.5449	0.023913	0.00829874	3020	tags=42%, list=23%, signal=55%
HNF1_01	Genes having at least one occurence of the transcription factor binding site V$HNF1_01 (v7.4 TRANSFAC) in the regions spanning up to 4 kb around their transcription starting sites.	243	158	0.367734	1.5448	0.00473934	0.00825765	2885	tags=35%, list=22%, signal=44%
RORA2_01	Genes having at least one occurence of the transcription factor binding site V$RORA2_01 (v7.4 TRANSFAC) in the regions spanning up to 4 kb around their transcription starting sites.	151	108	0.393088	1.54256	0.0046729	0.00850541	3331	tags=39%, list=26%, signal=52%
PTF1BETA_Q6	Genes having at least one occurence of the transcription factor binding site V$PTF1BETA_Q6 (v7.4 TRANSFAC) in the regions spanning up to 4 kb around their transcription starting sites.	238	172	0.362673	1.54248	0	0.00846372	3034	tags=33%, list=23%, signal=42%
PAX4_02	Genes having at least one occurence of the transcription factor binding site V$PAX4_02 (v7.4 TRANSFAC) in the regions spanning up to 4 kb around their transcription starting sites.	236	159	0.368162	1.53911	0	0.00871847	3119	tags=36%, list=24%, signal=47%
CCCNNNNNNAAGWT_UNKNOWN	Genes having at least one occurence of the highly conserved motif M158 CCCNNNNNNAAGWT in the region spanning up to 4 kb around their transcription start sites. The motif does not match any known transcription factor binding site (v7.4 TRANSFAC).	103	87	0.404303	1.53891	0.00222717	0.0086866	3136	tags=40%, list=24%, signal=53%
HSF1_01	Genes having at least one occurence of the transcription factor binding site V$HSF1_01 (v7.4 TRANSFAC) in the regions spanning up to 4 kb around their transcription starting sites.	269	200	0.356143	1.53835	0	0.00874494	2433	tags=27%, list=19%, signal=33%
FOX_Q2	Genes having at least one occurence of the transcription factor binding site V$FOX_Q2 (v7.4 TRANSFAC) in the regions spanning up to 4 kb around their transcription starting sites.	209	160	0.370412	1.5381	0	0.00873276	1922	tags=27%, list=15%, signal=31%
LXR_DR4_Q3	Genes having at least one occurence of the transcription factor binding site V$LXR_DR4_Q3 (v7.4 TRANSFAC) in the regions spanning up to 4 kb around their transcription starting sites.	92	68	0.419542	1.53708	0	0.00879968	2281	tags=28%, list=17%, signal=34%
NFE2_01	Genes having at least one occurence of the transcription factor binding site V$NFE2_01 (v7.4 TRANSFAC) in the regions spanning up to 4 kb around their transcription starting sites.	265	208	0.355935	1.53655	0	0.00883609	2079	tags=26%, list=16%, signal=31%
MYOD_Q6	Genes having at least one occurence of the transcription factor binding site V$MYOD_Q6 (v7.4 TRANSFAC) in the regions spanning up to 4 kb around their transcription starting sites.	244	177	0.363829	1.53588	0	0.00886365	2624	tags=31%, list=20%, signal=38%
E47_01	Genes having at least one occurence of the transcription factor binding site V$E47_01 (v7.4 TRANSFAC) in the regions spanning up to 4 kb around their transcription starting sites.	251	180	0.360108	1.53447	0	0.00898839	3105	tags=34%, list=24%, signal=44%
TGATTTRY_GFI1_01	Genes having at least one occurence of the highly conserved motif M94 TGATTTRY sites. The motif matches transcription factor binding site V$GFI1_01 (v7.4 TRANSFAC).	288	197	0.355415	1.53264	0	0.00914988	2300	tags=29%, list=18%, signal=35%
PBX1_02	Genes having at least one occurence of the transcription factor binding site V$PBX1_02 (v7.4 TRANSFAC) in the regions spanning up to 4 kb around their transcription starting sites.	131	93	0.395568	1.53244	0.00684931	0.00913574	2489	tags=33%, list=19%, signal=41%
RGAANNTTC_HSF1_01	Genes having at least one occurence of the highly conserved motif M68 RGAANNTTC sites. The motif matches transcription factor binding site V$HSF1_01 (v7.4 TRANSFAC).	448	341	0.334334	1.52974	0	0.00933455	2227	tags=22%, list=17%, signal=25%
ER_Q6	Genes having at least one occurence of the transcription factor binding site V$ER_Q6 (v7.4 TRANSFAC) in the regions spanning up to 4 kb around their transcription starting sites.	278	213	0.357357	1.52511	0	0.00985567	3364	tags=39%, list=26%, signal=52%
HNF4ALPHA_Q6	Genes having at least one occurence of the transcription factor binding site V$HNF4ALPHA_Q6 (v7.4 TRANSFAC) in the regions spanning up to 4 kb around their transcription starting sites.	269	212	0.351426	1.51921	0	0.0105237	2758	tags=30%, list=21%, signal=38%
STAT6_01	Genes having at least one occurence of the transcription factor binding site V$STAT6_01 (v7.4 TRANSFAC) in the regions spanning up to 4 kb around their transcription starting sites.	265	204	0.348889	1.51848	0	0.0105513	2613	tags=27%, list=20%, signal=34%
GR_Q6_01	Genes having at least one occurence of the transcription factor binding site V$GR_Q6_01 (v7.4 TRANSFAC) in the regions spanning up to 4 kb around their transcription starting sites.	267	204	0.35013	1.51764	0.00493827	0.010617	3364	tags=31%, list=26%, signal=41%
AR_Q6	Genes having at least one occurence of the transcription factor binding site V$AR_Q6 (v7.4 TRANSFAC) in the regions spanning up to 4 kb around their transcription starting sites.	253	191	0.356035	1.5173	0.00257069	0.0106706	2580	tags=28%, list=20%, signal=35%
YTAATTAA_LHX3_01	Genes having at least one occurence of the highly conserved motif M61 YTAATTAA sites. The motif matches transcription factor binding site V$LHX3_01 (v7.4 TRANSFAC).	191	127	0.372088	1.51338	0	0.0110672	3205	tags=38%, list=25%, signal=50%
NERF_Q2	Genes having at least one occurence of the transcription factor binding site V$NERF_Q2 (v7.4 TRANSFAC) in the regions spanning up to 4 kb around their transcription starting sites.	250	215	0.349474	1.51325	0	0.0110277	2832	tags=30%, list=22%, signal=37%
HNF1_C	Genes having at least one occurence of the transcription factor binding site V$HNF1_C (v7.4 TRANSFAC) in the regions spanning up to 4 kb around their transcription starting sites.	246	163	0.361089	1.51046	0.00502513	0.0112943	3018	tags=36%, list=23%, signal=46%
STAT5A_04	Genes having at least one occurence of the transcription factor binding site V$STAT5A_04 (v7.4 TRANSFAC) in the regions spanning up to 4 kb around their transcription starting sites.	212	149	0.360978	1.50858	0.00242718	0.0113849	2919	tags=33%, list=22%, signal=42%
HFH3_01	Genes having at least one occurence of the transcription factor binding site V$HFH3_01 (v7.4 TRANSFAC) in the regions spanning up to 4 kb around their transcription starting sites.	193	137	0.370684	1.50853	0.00226244	0.0113434	3031	tags=37%, list=23%, signal=48%
AREB6_01	Genes having at least one occurence of the transcription factor binding site V$AREB6_01 (v7.4 TRANSFAC) in the regions spanning up to 4 kb around their transcription starting sites.	269	186	0.348606	1.50514	0.00251889	0.0116426	2026	tags=24%, list=16%, signal=28%
CEBP_Q2_01	Genes having at least one occurence of the transcription factor binding site V$CEBP_Q2_01 (v7.4 TRANSFAC) in the regions spanning up to 4 kb around their transcription starting sites.	270	203	0.347439	1.50285	0	0.0118528	2194	tags=25%, list=17%, signal=30%
AREB6_04	Genes having at least one occurence of the transcription factor binding site V$AREB6_04 (v7.4 TRANSFAC) in the regions spanning up to 4 kb around their transcription starting sites.	248	189	0.352951	1.50046	0.00246305	0.0121681	1922	tags=22%, list=15%, signal=26%
CREBP1_01	Genes having at least one occurence of the transcription factor binding site V$CREBP1_01 (v7.4 TRANSFAC) in the regions spanning up to 4 kb around their transcription starting sites.	180	151	0.358139	1.49888	0.00493827	0.0123322	2619	tags=28%, list=20%, signal=35%
TTCYNRGAA_STAT5B_01	Genes having at least one occurence of the highly conserved motif M40 TTCYNRGAA sites. The motif matches transcription factor binding site V$STAT5B_01 (v7.4 TRANSFAC).	336	245	0.342865	1.4971	0	0.0125328	2772	tags=31%, list=21%, signal=38%
MYB_Q6	Genes having at least one occurence of the transcription factor binding site V$MYB_Q6 (v7.4 TRANSFAC) in the regions spanning up to 4 kb around their transcription starting sites.	251	192	0.353198	1.49665	0	0.0125404	2278	tags=27%, list=17%, signal=32%
CTAWWWATA_RSRFC4_Q2	Genes having at least one occurence of the highly conserved motif M28 CTAWWWATA sites. The motif matches transcription factor binding site V$RSRFC4_Q2 (v7.4 TRANSFAC).	361	238	0.341982	1.4966	0.00239234	0.0124864	1615	tags=20%, list=12%, signal=23%
CEBPB_01	Genes having at least one occurence of the transcription factor binding site V$CEBPB_01 (v7.4 TRANSFAC) in the regions spanning up to 4 kb around their transcription starting sites.	266	196	0.347548	1.49462	0.00218341	0.0125724	2194	tags=22%, list=17%, signal=26%
TCF4_Q5	Genes having at least one occurence of the transcription factor binding site V$TCF4_Q5 (v7.4 TRANSFAC) in the regions spanning up to 4 kb around their transcription starting sites.	237	153	0.356842	1.49318	0.00485437	0.0127328	2983	tags=35%, list=23%, signal=45%
STAT6_02	Genes having at least one occurence of the transcription factor binding site V$STAT6_02 (v7.4 TRANSFAC) in the regions spanning up to 4 kb around their transcription starting sites.	255	196	0.347601	1.49171	0.0108108	0.0128722	2609	tags=27%, list=20%, signal=33%
AP2_Q6_01	Genes having at least one occurence of the transcription factor binding site V$AP2_Q6_01 (v7.4 TRANSFAC) in the regions spanning up to 4 kb around their transcription starting sites.	267	225	0.340207	1.48994	0	0.0130297	3367	tags=34%, list=26%, signal=45%
RYTGCNWTGGNR_UNKNOWN	Genes having at least one occurence of the highly conserved motif M87 RYTGCNWTGGNR in the region spanning up to 4 kb around their transcription start sites. The motif does not match any known transcription factor binding site (v7.4 TRANSFAC).	115	83	0.391673	1.48935	0.00457666	0.0130543	1916	tags=28%, list=15%, signal=32%
AFP1_Q6	Genes having at least one occurence of the transcription factor binding site V$AFP1_Q6 (v7.4 TRANSFAC) in the regions spanning up to 4 kb around their transcription starting sites.	263	198	0.345035	1.4798	0	0.0144353	2885	tags=32%, list=22%, signal=40%
PAX5_01	Genes having at least one occurence of the transcription factor binding site V$PAX5_01 (v7.4 TRANSFAC) in the regions spanning up to 4 kb around their transcription starting sites.	154	129	0.362267	1.47847	0.00533333	0.0145506	2393	tags=25%, list=18%, signal=30%
ETS1_B	Genes having at least one occurence of the transcription factor binding site V$ETS1_B (v7.4 TRANSFAC) in the regions spanning up to 4 kb around their transcription starting sites.	263	215	0.338057	1.47754	0	0.014628	2186	tags=21%, list=17%, signal=25%
MAZ_Q6	Genes having at least one occurence of the transcription factor binding site V$MAZ_Q6 (v7.4 TRANSFAC) in the regions spanning up to 4 kb around their transcription starting sites.	191	158	0.353544	1.47733	0.00224215	0.0146274	2382	tags=23%, list=18%, signal=28%
AAAYRNCTG_UNKNOWN	Genes having at least one occurence of the highly conserved motif M77 AAAYRNCTG in the region spanning up to 4 kb around their transcription start sites. The motif does not match any known transcription factor binding site (v7.4 TRANSFAC).	364	270	0.329636	1.47604	0	0.0147316	2844	tags=30%, list=22%, signal=38%
IPF1_Q4	Genes having at least one occurence of the transcription factor binding site V$IPF1_Q4 (v7.4 TRANSFAC) in the regions spanning up to 4 kb around their transcription starting sites.	253	172	0.351645	1.47562	0.00647948	0.0147742	1938	tags=23%, list=15%, signal=27%
YCATTAA_UNKNOWN	Genes having at least one occurence of the highly conserved motif M58 YCATTAA in the region spanning up to 4 kb around their transcription start sites. The motif does not match any known transcription factor binding site (v7.4 TRANSFAC).	562	372	0.319087	1.47499	0	0.0148413	2653	tags=29%, list=20%, signal=35%
ETS_Q4	Genes having at least one occurence of the transcription factor binding site V$ETS_Q4 (v7.4 TRANSFAC) in the regions spanning up to 4 kb around their transcription starting sites.	250	206	0.344435	1.47485	0.00249377	0.0148064	3095	tags=33%, list=24%, signal=43%
RFX1_02	Genes having at least one occurence of the transcription factor binding site V$RFX1_02 (v7.4 TRANSFAC) in the regions spanning up to 4 kb around their transcription starting sites.	278	208	0.344874	1.47209	0.00271003	0.0151092	2210	tags=26%, list=17%, signal=31%
HLF_01	Genes having at least one occurence of the transcription factor binding site V$HLF_01 (v7.4 TRANSFAC) in the regions spanning up to 4 kb around their transcription starting sites.	257	211	0.337992	1.47198	0	0.0150652	2636	tags=28%, list=20%, signal=34%
YTATTTTNR_MEF2_02	Genes having at least one occurence of the highly conserved motif M33 YTATTTTNR sites. The motif matches transcription factor binding site V$MEF2_02 (v7.4 TRANSFAC).	701	494	0.311032	1.46926	0	0.0154854	2266	tags=25%, list=17%, signal=29%
TGANNYRGCA_TCF11MAFG_01	Genes having at least one occurence of the highly conserved motif M67 TGANNYRGCA sites. The motif matches transcription factor binding site V$TCF11MAFG_01 (v7.4 TRANSFAC).	298	232	0.332434	1.46876	0	0.0155301	2188	tags=22%, list=17%, signal=26%
EGR1_01	Genes having at least one occurence of the transcription factor binding site V$EGR1_01 (v7.4 TRANSFAC) in the regions spanning up to 4 kb around their transcription starting sites.	266	218	0.336285	1.46685	0.002331	0.0157421	1889	tags=20%, list=14%, signal=23%
FOXO3_01	Genes having at least one occurence of the transcription factor binding site V$FOXO3_01 (v7.4 TRANSFAC) in the regions spanning up to 4 kb around their transcription starting sites.	248	187	0.345176	1.46462	0.00236407	0.016118	2919	tags=34%, list=22%, signal=43%
AP4_Q6_01	Genes having at least one occurence of the transcription factor binding site V$AP4_Q6_01 (v7.4 TRANSFAC) in the regions spanning up to 4 kb around their transcription starting sites.	254	170	0.349596	1.46352	0	0.0162432	2832	tags=36%, list=22%, signal=46%
POU3F2_02	Genes having at least one occurence of the transcription factor binding site V$POU3F2_02 (v7.4 TRANSFAC) in the regions spanning up to 4 kb around their transcription starting sites.	262	188	0.343325	1.46252	0.00468384	0.016343	2769	tags=34%, list=21%, signal=42%
CDX2_Q5	Genes having at least one occurence of the transcription factor binding site V$CDX2_Q5 (v7.4 TRANSFAC) in the regions spanning up to 4 kb around their transcription starting sites.	258	192	0.344282	1.4597	0.00235849	0.0166955	2636	tags=33%, list=20%, signal=41%
GATA1_02	Genes having at least one occurence of the transcription factor binding site V$GATA1_02 (v7.4 TRANSFAC) in the regions spanning up to 4 kb around their transcription starting sites.	243	166	0.345137	1.45934	0.00471698	0.0166777	2979	tags=33%, list=23%, signal=42%
KRCTCNNNNMANAGC_UNKNOWN	Genes having at least one occurence of the highly conserved motif M120 KRCTCNNNNMANAGC in the region spanning up to 4 kb around their transcription start sites. The motif does not match any known transcription factor binding site (v7.4 TRANSFAC).	66	18	0.535962	1.45807	0.0661157	0.0167671	543	tags=28%, list=4%, signal=29%
SOX9_B1	Genes having at least one occurence of the transcription factor binding site V$SOX9_B1 (v7.4 TRANSFAC) in the regions spanning up to 4 kb around their transcription starting sites.	235	190	0.339168	1.45751	0.0023753	0.0168039	3260	tags=39%, list=25%, signal=51%
AR_02	Genes having at least one occurence of the transcription factor binding site V$AR_02 (v7.4 TRANSFAC) in the regions spanning up to 4 kb around their transcription starting sites.	38	32	0.468829	1.45656	0.0456432	0.0168855	1263	tags=28%, list=10%, signal=31%
NRF2_Q4	Genes having at least one occurence of the transcription factor binding site V$NRF2_Q4 (v7.4 TRANSFAC) in the regions spanning up to 4 kb around their transcription starting sites.	254	203	0.335447	1.45474	0	0.0171811	2969	tags=31%, list=23%, signal=40%
BACH1_01	Genes having at least one occurence of the transcription factor binding site V$BACH1_01 (v7.4 TRANSFAC) in the regions spanning up to 4 kb around their transcription starting sites.	259	206	0.33625	1.45431	0	0.017194	1607	tags=18%, list=12%, signal=21%
MMEF2_Q6	Genes having at least one occurence of the transcription factor binding site V$MMEF2_Q6 (v7.4 TRANSFAC) in the regions spanning up to 4 kb around their transcription starting sites.	267	189	0.339779	1.44624	0.00238095	0.0186477	2740	tags=32%, list=21%, signal=40%
PIT1_Q6	Genes having at least one occurence of the transcription factor binding site V$PIT1_Q6 (v7.4 TRANSFAC) in the regions spanning up to 4 kb around their transcription starting sites.	233	165	0.34021	1.44482	0.00475059	0.0189385	2825	tags=33%, list=22%, signal=41%
GGGNRMNNYCAT_UNKNOWN	Genes having at least one occurence of the highly conserved motif M119 GGGNRMNNYCAT in the region spanning up to 4 kb around their transcription start sites. The motif does not match any known transcription factor binding site (v7.4 TRANSFAC).	82	71	0.382544	1.44431	0.0150538	0.0189853	3252	tags=38%, list=25%, signal=50%
SP1_Q6	Genes having at least one occurence of the transcription factor binding site V$SP1_Q6 (v7.4 TRANSFAC) in the regions spanning up to 4 kb around their transcription starting sites.	256	220	0.33531	1.44387	0.00230947	0.0190229	2602	tags=29%, list=20%, signal=36%
TITF1_Q3	Genes having at least one occurence of the transcription factor binding site V$TITF1_Q3 (v7.4 TRANSFAC) in the regions spanning up to 4 kb around their transcription starting sites.	239	182	0.340745	1.44353	0.00544959	0.0189897	2908	tags=31%, list=22%, signal=39%
AP2_Q3	Genes having at least one occurence of the transcription factor binding site V$AP2_Q3 (v7.4 TRANSFAC) in the regions spanning up to 4 kb around their transcription starting sites.	253	197	0.337526	1.44308	0.00246914	0.0190042	3486	tags=32%, list=27%, signal=43%
SF1_Q6	Genes having at least one occurence of the transcription factor binding site V$SF1_Q6 (v7.4 TRANSFAC) in the regions spanning up to 4 kb around their transcription starting sites.	255	210	0.331803	1.44291	0	0.0189478	2130	tags=23%, list=16%, signal=27%
GCM_Q2	Genes having at least one occurence of the transcription factor binding site V$GCM_Q2 (v7.4 TRANSFAC) in the regions spanning up to 4 kb around their transcription starting sites.	239	178	0.340859	1.43675	0.00507614	0.0201706	2399	tags=26%, list=18%, signal=32%
ICSBP_Q6	Genes having at least one occurence of the transcription factor binding site V$ICSBP_Q6 (v7.4 TRANSFAC) in the regions spanning up to 4 kb around their transcription starting sites.	250	196	0.338491	1.43572	0.00475059	0.0203198	3138	tags=34%, list=24%, signal=44%
TST1_01	Genes having at least one occurence of the transcription factor binding site V$TST1_01 (v7.4 TRANSFAC) in the regions spanning up to 4 kb around their transcription starting sites.	257	180	0.34083	1.43442	0.0120482	0.0205981	2393	tags=28%, list=18%, signal=34%
DR1_Q3	Genes having at least one occurence of the transcription factor binding site V$DR1_Q3 (v7.4 TRANSFAC) in the regions spanning up to 4 kb around their transcription starting sites.	260	205	0.331826	1.43377	0.00469484	0.0206836	2755	tags=31%, list=21%, signal=38%
POU1F1_Q6	Genes having at least one occurence of the transcription factor binding site V$POU1F1_Q6 (v7.4 TRANSFAC) in the regions spanning up to 4 kb around their transcription starting sites.	234	163	0.344338	1.43375	0.0110132	0.0206221	3130	tags=31%, list=24%, signal=41%
WWTAAGGC_UNKNOWN	Genes having at least one occurence of the highly conserved motif M127 WWTAAGGC in the region spanning up to 4 kb around their transcription start sites. The motif does not match any known transcription factor binding site (v7.4 TRANSFAC).	146	105	0.359105	1.43302	0.0183486	0.0206913	2933	tags=32%, list=22%, signal=41%
NKX61_01	Genes having at least one occurence of the transcription factor binding site V$NKX61_01 (v7.4 TRANSFAC) in the regions spanning up to 4 kb around their transcription starting sites.	233	158	0.341265	1.42756	0.00913242	0.0217015	2825	tags=34%, list=22%, signal=43%
GCTNWTTGK_UNKNOWN	Genes having at least one occurence of the highly conserved motif M78 GCTNWTTGK in the region spanning up to 4 kb around their transcription start sites. The motif does not match any known transcription factor binding site (v7.4 TRANSFAC).	304	235	0.321018	1.42731	0.00230947	0.0216767	2901	tags=30%, list=22%, signal=38%
CEBP_01	Genes having at least one occurence of the transcription factor binding site V$CEBP_01 (v7.4 TRANSFAC) in the regions spanning up to 4 kb around their transcription starting sites.	272	196	0.331678	1.42578	0	0.0218835	2935	tags=38%, list=23%, signal=48%
FXR_IR1_Q6	Genes having at least one occurence of the transcription factor binding site V$FXR_IR1_Q6 (v7.4 TRANSFAC) in the regions spanning up to 4 kb around their transcription starting sites.	109	79	0.377029	1.42482	0.0091954	0.0220299	3256	tags=44%, list=25%, signal=59%
HSF2_01	Genes having at least one occurence of the transcription factor binding site V$HSF2_01 (v7.4 TRANSFAC) in the regions spanning up to 4 kb around their transcription starting sites.	252	187	0.333659	1.42463	0.0075	0.0219966	2227	tags=24%, list=17%, signal=28%
COREBINDINGFACTOR_Q6	Genes having at least one occurence of the transcription factor binding site V$COREBINDINGFACTOR_Q6 (v7.4 TRANSFAC) in the regions spanning up to 4 kb around their transcription starting sites.	270	185	0.330326	1.42179	0.00232019	0.0224994	2990	tags=34%, list=23%, signal=44%
YNGTTNNNATT_UNKNOWN	Genes having at least one occurence of the highly conserved motif M170 YNGTTNNNATT in the region spanning up to 4 kb around their transcription start sites. The motif does not match any known transcription factor binding site (v7.4 TRANSFAC).	372	271	0.321918	1.42175	0.00722892	0.0224271	2757	tags=29%, list=21%, signal=36%
TGAYRTCA_ATF3_Q6	Genes having at least one occurence of the highly conserved motif M9 TGAYRTCA sites. The motif matches transcription factor binding site V$ATF3_Q6 (v7.4 TRANSFAC).	543	387	0.306442	1.41345	0.00250627	0.0244372	2562	tags=25%, list=20%, signal=30%
HNF4_01_B	Genes having at least one occurence of the transcription factor binding site V$HNF4_01_B (v7.4 TRANSFAC) in the regions spanning up to 4 kb around their transcription starting sites.	254	189	0.333225	1.41124	0.00232558	0.0249363	3233	tags=33%, list=25%, signal=43%
DBP_Q6	Genes having at least one occurence of the transcription factor binding site V$DBP_Q6 (v7.4 TRANSFAC) in the regions spanning up to 4 kb around their transcription starting sites.	261	192	0.329437	1.41078	0.0124069	0.0249451	2819	tags=31%, list=22%, signal=39%
AP2REP_01	Genes having at least one occurence of the transcription factor binding site V$AP2REP_01 (v7.4 TRANSFAC) in the regions spanning up to 4 kb around their transcription starting sites.	179	129	0.344717	1.40936	0.0119617	0.0252305	3473	tags=40%, list=27%, signal=54%
ZID_01	Genes having at least one occurence of the transcription factor binding site V$ZID_01 (v7.4 TRANSFAC) in the regions spanning up to 4 kb around their transcription starting sites.	265	205	0.328723	1.40685	0.00719425	0.025717	2766	tags=28%, list=21%, signal=35%
TGCCAAR_NF1_Q6	Genes having at least one occurence of the highly conserved motif M47 TGCCAAR sites. The motif matches transcription factor binding site V$NF1_Q6 (v7.4 TRANSFAC).	710	494	0.300266	1.40642	0	0.0257265	3103	tags=30%, list=24%, signal=38%
ER_Q6_01	Genes having at least one occurence of the transcription factor binding site V$ER_Q6_01 (v7.4 TRANSFAC) in the regions spanning up to 4 kb around their transcription starting sites.	277	214	0.323579	1.40627	0.0148148	0.0256724	2098	tags=23%, list=16%, signal=27%
PAX8_01	Genes having at least one occurence of the transcription factor binding site V$PAX8_01 (v7.4 TRANSFAC) in the regions spanning up to 4 kb around their transcription starting sites.	37	26	0.463414	1.40269	0.0675676	0.026418	1415	tags=27%, list=11%, signal=30%
COUP_DR1_Q6	Genes having at least one occurence of the transcription factor binding site V$COUP_DR1_Q6 (v7.4 TRANSFAC) in the regions spanning up to 4 kb around their transcription starting sites.	248	201	0.327887	1.40262	0.00493827	0.0263337	2927	tags=31%, list=22%, signal=40%
RSRFC4_Q2	Genes having at least one occurence of the transcription factor binding site V$RSRFC4_Q2 (v7.4 TRANSFAC) in the regions spanning up to 4 kb around their transcription starting sites.	214	142	0.337576	1.40254	0.0113895	0.0262713	2920	tags=32%, list=22%, signal=41%
HSF_Q6	Genes having at least one occurence of the transcription factor binding site V$HSF_Q6 (v7.4 TRANSFAC) in the regions spanning up to 4 kb around their transcription starting sites.	204	159	0.335756	1.3997	0.00980392	0.0270865	3509	tags=34%, list=27%, signal=46%
MEF2_03	Genes having at least one occurence of the transcription factor binding site V$MEF2_03 (v7.4 TRANSFAC) in the regions spanning up to 4 kb around their transcription starting sites.	237	164	0.334241	1.39938	0.0078125	0.027093	1312	tags=16%, list=10%, signal=18%
TCF11MAFG_01	Genes having at least one occurence of the transcription factor binding site V$TCF11MAFG_01 (v7.4 TRANSFAC) in the regions spanning up to 4 kb around their transcription starting sites.	204	156	0.328236	1.39834	0.0107296	0.0272708	2722	tags=26%, list=21%, signal=33%
TCF11_01	Genes having at least one occurence of the transcription factor binding site V$TCF11_01 (v7.4 TRANSFAC) in the regions spanning up to 4 kb around their transcription starting sites.	255	189	0.32751	1.39722	0.00496278	0.0274671	3030	tags=29%, list=23%, signal=37%
CREB_Q2	Genes having at least one occurence of the transcription factor binding site V$CREB_Q2 (v7.4 TRANSFAC) in the regions spanning up to 4 kb around their transcription starting sites.	267	224	0.318843	1.39674	0.00232558	0.0275342	2693	tags=26%, list=21%, signal=32%
HMEF2_Q6	Genes having at least one occurence of the transcription factor binding site V$HMEF2_Q6 (v7.4 TRANSFAC) in the regions spanning up to 4 kb around their transcription starting sites.	139	87	0.360265	1.39483	0.0253456	0.0280137	2892	tags=32%, list=22%, signal=41%
WCAANNNYCAG_UNKNOWN	Genes having at least one occurence of the highly conserved motif M152 WCAANNNYCAG in the region spanning up to 4 kb around their transcription start sites. The motif does not match any known transcription factor binding site (v7.4 TRANSFAC).	252	208	0.317064	1.39375	0.0026178	0.0282526	3306	tags=35%, list=25%, signal=46%
S8_01	Genes having at least one occurence of the transcription factor binding site V$S8_01 (v7.4 TRANSFAC) in the regions spanning up to 4 kb around their transcription starting sites.	243	158	0.330255	1.39108	0.00952381	0.0288667	2920	tags=34%, list=22%, signal=44%
AML1_Q6	Genes having at least one occurence of the transcription factor binding site V$AML1_Q6 (v7.4 TRANSFAC) in the regions spanning up to 4 kb around their transcription starting sites.	269	201	0.319047	1.38576	0	0.0303424	2678	tags=28%, list=21%, signal=35%
EGR2_01	Genes having at least one occurence of the transcription factor binding site V$EGR2_01 (v7.4 TRANSFAC) in the regions spanning up to 4 kb around their transcription starting sites.	198	155	0.329035	1.38473	0.0140515	0.0305694	2272	tags=25%, list=17%, signal=29%
PEA3_Q6	Genes having at least one occurence of the transcription factor binding site V$PEA3_Q6 (v7.4 TRANSFAC) in the regions spanning up to 4 kb around their transcription starting sites.	262	205	0.317471	1.38438	0.00234192	0.0305513	3680	tags=39%, list=28%, signal=53%
AHRARNT_01	Genes having at least one occurence of the transcription factor binding site V$AHRARNT_01 (v7.4 TRANSFAC) in the regions spanning up to 4 kb around their transcription starting sites.	141	113	0.346643	1.37979	0.0183066	0.0320317	2375	tags=30%, list=18%, signal=36%
AML1_01	Genes having at least one occurence of the transcription factor binding site V$AML1_01 (v7.4 TRANSFAC) in the regions spanning up to 4 kb around their transcription starting sites.	269	201	0.319047	1.37779	0	0.0324395	2678	tags=28%, list=21%, signal=35%
RYTGCNNRGNAAC_MIF1_01	Genes having at least one occurence of the highly conserved motif M53 RYTGCNNRGNAAC sites. The motif matches transcription factor binding site V$MIF1_01 (v7.4 TRANSFAC).	89	66	0.381697	1.37461	0.04814	0.033336	2662	tags=33%, list=20%, signal=42%
ER_Q6_02	Genes having at least one occurence of the transcription factor binding site V$ER_Q6_02 (v7.4 TRANSFAC) in the regions spanning up to 4 kb around their transcription starting sites.	256	189	0.318277	1.37353	0.00737101	0.0335042	3064	tags=33%, list=24%, signal=42%
POU6F1_01	Genes having at least one occurence of the transcription factor binding site V$POU6F1_01 (v7.4 TRANSFAC) in the regions spanning up to 4 kb around their transcription starting sites.	237	161	0.328486	1.37329	0.0115473	0.0335061	2015	tags=25%, list=15%, signal=29%
STAT_01	Genes having at least one occurence of the transcription factor binding site V$STAT_01 (v7.4 TRANSFAC) in the regions spanning up to 4 kb around their transcription starting sites.	255	190	0.322262	1.37264	0.00987654	0.0336115	3043	tags=33%, list=23%, signal=43%
MSX1_01	Genes having at least one occurence of the transcription factor binding site V$MSX1_01 (v7.4 TRANSFAC) in the regions spanning up to 4 kb around their transcription starting sites.	173	123	0.34211	1.37246	0.00952381	0.0335806	2184	tags=24%, list=17%, signal=29%
MEIS1AHOXA9_01	Genes having at least one occurence of the transcription factor binding site V$MEIS1AHOXA9_01 (v7.4 TRANSFAC) in the regions spanning up to 4 kb around their transcription starting sites.	118	82	0.363576	1.36953	0.039261	0.0343627	1385	tags=21%, list=11%, signal=23%
NKX25_02	Genes having at least one occurence of the transcription factor binding site V$NKX25_02 (v7.4 TRANSFAC) in the regions spanning up to 4 kb around their transcription starting sites.	261	176	0.321371	1.36399	0.00691244	0.0362704	2990	tags=34%, list=23%, signal=43%
MEF2_01	Genes having at least one occurence of the transcription factor binding site V$MEF2_01 (v7.4 TRANSFAC) in the regions spanning up to 4 kb around their transcription starting sites.	147	88	0.357339	1.35998	0.0497738	0.0378307	1207	tags=17%, list=9%, signal=19%
ALPHACP1_01	Genes having at least one occurence of the transcription factor binding site V$ALPHACP1_01 (v7.4 TRANSFAC) in the regions spanning up to 4 kb around their transcription starting sites.	260	205	0.315578	1.3582	0.010582	0.038389	1779	tags=21%, list=14%, signal=24%
EFC_Q6	Genes having at least one occurence of the transcription factor binding site V$EFC_Q6 (v7.4 TRANSFAC) in the regions spanning up to 4 kb around their transcription starting sites.	270	190	0.314408	1.35641	0.004914	0.0389576	4088	tags=41%, list=31%, signal=59%
AP1_01	Genes having at least one occurence of the transcription factor binding site V$AP1_01 (v7.4 TRANSFAC) in the regions spanning up to 4 kb around their transcription starting sites.	264	200	0.315922	1.35416	0.0126904	0.0396641	2326	tags=24%, list=18%, signal=29%
OCT1_07	Genes having at least one occurence of the transcription factor binding site V$OCT1_07 (v7.4 TRANSFAC) in the regions spanning up to 4 kb around their transcription starting sites.	160	111	0.340778	1.34725	0.0340136	0.042267	2825	tags=31%, list=22%, signal=39%
IRF7_01	Genes having at least one occurence of the transcription factor binding site V$IRF7_01 (v7.4 TRANSFAC) in the regions spanning up to 4 kb around their transcription starting sites.	251	183	0.313076	1.34631	0.026253	0.0424968	2779	tags=30%, list=21%, signal=38%
RORA1_01	Genes having at least one occurence of the transcription factor binding site V$RORA1_01 (v7.4 TRANSFAC) in the regions spanning up to 4 kb around their transcription starting sites.	246	185	0.312306	1.34489	0.0253456	0.0429554	2085	tags=23%, list=16%, signal=27%
AGCYRWTTC_UNKNOWN	Genes having at least one occurence of the highly conserved motif M135 AGCYRWTTC in the region spanning up to 4 kb around their transcription start sites. The motif does not match any known transcription factor binding site (v7.4 TRANSFAC).	121	80	0.351292	1.3426	0.0359551	0.0438441	859	tags=14%, list=7%, signal=15%
TATA_C	Genes having at least one occurence of the transcription factor binding site V$TATA_C (v7.4 TRANSFAC) in the regions spanning up to 4 kb around their transcription starting sites.	285	180	0.313283	1.34	0.0127226	0.0447471	1656	tags=22%, list=13%, signal=25%
CRGAARNNNNCGA_UNKNOWN	Genes having at least one occurence of the highly conserved motif M100 CRGAARNNNNCGA in the region spanning up to 4 kb around their transcription start sites. The motif does not match any known transcription factor binding site (v7.4 TRANSFAC).	48	44	0.396005	1.33908	0.0686695	0.0450349	1827	tags=18%, list=14%, signal=21%
TTAYRTAA_E4BP4_01	Genes having at least one occurence of the highly conserved motif M26 TTAYRTAA sites. The motif matches transcription factor binding site V$E4BP4_01 (v7.4 TRANSFAC).	264	210	0.305478	1.33825	0.0141509	0.0453279	2372	tags=22%, list=18%, signal=27%
SP1_Q4_01	Genes having at least one occurence of the transcription factor binding site V$SP1_Q4_01 (v7.4 TRANSFAC) in the regions spanning up to 4 kb around their transcription starting sites.	254	218	0.309734	1.33727	0.00468384	0.0455332	2602	tags=28%, list=20%, signal=35%
PPAR_DR1_Q2	Genes having at least one occurence of the transcription factor binding site V$PPAR_DR1_Q2 (v7.4 TRANSFAC) in the regions spanning up to 4 kb around their transcription starting sites.	261	207	0.312081	1.33424	0.0136054	0.0466954	2597	tags=27%, list=20%, signal=33%
GATA3_01	Genes having at least one occurence of the transcription factor binding site V$GATA3_01 (v7.4 TRANSFAC) in the regions spanning up to 4 kb around their transcription starting sites.	238	157	0.319881	1.33302	0.0283505	0.0471385	2847	tags=32%, list=22%, signal=41%
STAT_Q6	Genes having at least one occurence of the transcription factor binding site V$STAT_Q6 (v7.4 TRANSFAC) in the regions spanning up to 4 kb around their transcription starting sites.	260	195	0.309311	1.3318	0.0120482	0.0475504	2619	tags=26%, list=20%, signal=32%
TGACATY_UNKNOWN	Genes having at least one occurence of the highly conserved motif M42 TGACATY in the region spanning up to 4 kb around their transcription start sites. The motif does not match any known transcription factor binding site (v7.4 TRANSFAC).	670	463	0.284146	1.33051	0	0.0480111	2979	tags=28%, list=23%, signal=35%
AP2_Q6	Genes having at least one occurence of the transcription factor binding site V$AP2_Q6 (v7.4 TRANSFAC) in the regions spanning up to 4 kb around their transcription starting sites.	258	222	0.30484	1.32946	0.0147059	0.0484322	3016	tags=27%, list=23%, signal=35%
WGTTNNNNNAAA_UNKNOWN	Genes having at least one occurence of the highly conserved motif M155 WGTTNNNNNAAA in the region spanning up to 4 kb around their transcription start sites. The motif does not match any known transcription factor binding site (v7.4 TRANSFAC).	550	414	0.284584	1.32617	0	0.0499666	2935	tags=29%, list=23%, signal=36%
XBP1_01	Genes having at least one occurence of the transcription factor binding site V$XBP1_01 (v7.4 TRANSFAC) in the regions spanning up to 4 kb around their transcription starting sites.	135	108	0.333963	1.32611	0.0393873	0.0498385	1585	tags=16%, list=12%, signal=18%

## Sheet: Normal
NAME	msigdb_c3_tft_tft_legacy_term_desc	Original size	Size (after restricting to dataset)	ES	NES	NOM p-val	FDR q-val	RANK AT MAX	LEADING EDGE
E2F1_Q6	Genes having at least one occurence of the transcription factor binding site V$E2F1_Q6 (v7.4 TRANSFAC) in the regions spanning up to 4 kb around their transcription starting sites.	235	215	-0.551054	-2.32987	0	0	2095	tags=42%, list=16%, signal=50%
E2F4DP2_01	Genes having at least one occurence of the transcription factor binding site V$E2F4DP2_01 (v7.4 TRANSFAC) in the regions spanning up to 4 kb around their transcription starting sites.	237	211	-0.549849	-2.32681	0	0	2095	tags=42%, list=16%, signal=49%
E2F_Q6	Genes having at least one occurence of the transcription factor binding site V$E2F_Q6 (v7.4 TRANSFAC) in the regions spanning up to 4 kb around their transcription starting sites.	235	212	-0.550672	-2.32641	0	0	2294	tags=44%, list=18%, signal=53%
E2F_02	Genes having at least one occurence of the transcription factor binding site V$E2F_02 (v7.4 TRANSFAC) in the regions spanning up to 4 kb around their transcription starting sites.	237	211	-0.548528	-2.30481	0	0	2095	tags=42%, list=16%, signal=49%
E2F_Q4	Genes having at least one occurence of the transcription factor binding site V$E2F_Q4 (v7.4 TRANSFAC) in the regions spanning up to 4 kb around their transcription starting sites.	237	216	-0.546665	-2.30093	0	0	2294	tags=43%, list=18%, signal=51%
E2F1DP1_01	Genes having at least one occurence of the transcription factor binding site V$E2F1DP1_01 (v7.4 TRANSFAC) in the regions spanning up to 4 kb around their transcription starting sites.	237	211	-0.549849	-2.29746	0	0	2095	tags=42%, list=16%, signal=49%
E2F1DP2_01	Genes having at least one occurence of the transcription factor binding site V$E2F1DP2_01 (v7.4 TRANSFAC) in the regions spanning up to 4 kb around their transcription starting sites.	237	211	-0.549849	-2.29309	0	0	2095	tags=42%, list=16%, signal=49%
SGCGSSAAA_E2F1DP2_01	Genes having at least one occurence of the highly conserved motif M69 SGCGSSAAA sites. The motif matches transcription factor binding site V$E2F1DP2_01 (v7.4 TRANSFAC).	169	153	-0.562233	-2.24667	0	0	2095	tags=44%, list=16%, signal=52%
E2F4DP1_01	Genes having at least one occurence of the transcription factor binding site V$E2F4DP1_01 (v7.4 TRANSFAC) in the regions spanning up to 4 kb around their transcription starting sites.	240	214	-0.531912	-2.2255	0	0	2229	tags=43%, list=17%, signal=52%
E2F1_Q4_01	Genes having at least one occurence of the transcription factor binding site V$E2F1_Q4_01 (v7.4 TRANSFAC) in the regions spanning up to 4 kb around their transcription starting sites.	229	203	-0.526261	-2.19761	0	0	2294	tags=40%, list=18%, signal=48%
E2F_Q3_01	Genes having at least one occurence of the transcription factor binding site V$E2F_Q3_01 (v7.4 TRANSFAC) in the regions spanning up to 4 kb around their transcription starting sites.	236	210	-0.525084	-2.1873	0	0	2294	tags=40%, list=18%, signal=47%
E2F1_Q3	Genes having at least one occurence of the transcription factor binding site V$E2F1_Q3 (v7.4 TRANSFAC) in the regions spanning up to 4 kb around their transcription starting sites.	246	219	-0.51768	-2.18637	0	0	2094	tags=41%, list=16%, signal=48%
E2F_Q4_01	Genes having at least one occurence of the transcription factor binding site V$E2F_Q4_01 (v7.4 TRANSFAC) in the regions spanning up to 4 kb around their transcription starting sites.	238	213	-0.515188	-2.17395	0	0	2323	tags=39%, list=18%, signal=47%
E2F_Q6_01	Genes having at least one occurence of the transcription factor binding site V$E2F_Q6_01 (v7.4 TRANSFAC) in the regions spanning up to 4 kb around their transcription starting sites.	240	207	-0.513368	-2.13228	0	0	2323	tags=38%, list=18%, signal=46%
E2F1DP1RB_01	Genes having at least one occurence of the transcription factor binding site V$E2F1DP1RB_01 (v7.4 TRANSFAC) in the regions spanning up to 4 kb around their transcription starting sites.	231	206	-0.508402	-2.13112	0	0	2294	tags=43%, list=18%, signal=51%
E2F_03	Genes having at least one occurence of the transcription factor binding site V$E2F_03 (v7.4 TRANSFAC) in the regions spanning up to 4 kb around their transcription starting sites.	249	220	-0.504002	-2.12325	0	0	2294	tags=37%, list=18%, signal=44%
E2F1_Q6_01	Genes having at least one occurence of the transcription factor binding site V$E2F1_Q6_01 (v7.4 TRANSFAC) in the regions spanning up to 4 kb around their transcription starting sites.	240	222	-0.497895	-2.10883	0	0	2294	tags=38%, list=18%, signal=46%
E2F_Q3	Genes having at least one occurence of the transcription factor binding site V$E2F_Q3 (v7.4 TRANSFAC) in the regions spanning up to 4 kb around their transcription starting sites.	227	197	-0.48003	-1.99743	0	2.32316e-05	2263	tags=38%, list=17%, signal=45%
KTGGYRSGAA_UNKNOWN	Genes having at least one occurence of the highly conserved motif M112 KTGGYRSGAA in the region spanning up to 4 kb around their transcription start sites. The motif does not match any known transcription factor binding site (v7.4 TRANSFAC).	77	70	-0.518141	-1.86128	0	0.000191178	2304	tags=37%, list=18%, signal=45%
E2F1_Q4	Genes having at least one occurence of the transcription factor binding site V$E2F1_Q4 (v7.4 TRANSFAC) in the regions spanning up to 4 kb around their transcription starting sites.	246	221	-0.39618	-1.68982	0	0.00165072	2334	tags=27%, list=18%, signal=32%
GKCGCNNNNNNNTGAYG_UNKNOWN	Genes having at least one occurence of the highly conserved motif M19 GKCGCNNNNNNNTGAYG in the region spanning up to 4 kb around their transcription start sites. The motif does not match any known transcription factor binding site (v7.4 TRANSFAC).	60	59	-0.463408	-1.60707	0.0034904	0.0045907	4423	tags=56%, list=34%, signal=84%
CAGNWMCNNNGAC_UNKNOWN	Genes having at least one occurence of the highly conserved motif M143 CAGNWMCNNNGAC in the region spanning up to 4 kb around their transcription start sites. The motif does not match any known transcription factor binding site (v7.4 TRANSFAC).	85	44	-0.450723	-1.47215	0.0373832	0.022845	2187	tags=41%, list=17%, signal=49%
E2F_01	Genes having at least one occurence of the transcription factor binding site V$E2F_01 (v7.4 TRANSFAC) in the regions spanning up to 4 kb around their transcription starting sites.	68	57	-0.415668	-1.44125	0.0282486	0.0308	2294	tags=40%, list=18%, signal=49%
